# Supplementary material for: The dose-dependent mechanism behind the protective effect of lentinan against acute alcoholic liver injury via proliferating intestinal probiotics
Source: Royal Society of Chemistry journal article supplement (doi:10.1039/d4fo02256d), 2024-01-01
Supplement: d4fo02256d1.pdf [file d4fo02256d1.pdf]

### FTIR

**Wavenumber(cm<sup>-1</sup>) Transmittance(%)**

|           |        |
|-----------|--------|
| 3996.2579 | 1.0000 |
| 3994.3292 | 0.9999 |
| 3992.4006 | 0.9999 |
| 3990.4719 | 0.9998 |
| 3988.5432 | 0.9997 |
| 3986.6145 | 0.9995 |
| 3984.6858 | 0.9993 |
| 3982.7571 | 0.9992 |
| 3980.8284 | 0.9991 |
| 3978.8997 | 0.9990 |
| 3976.9710 | 0.9989 |
| 3975.0423 | 0.9988 |
| 3973.1136 | 0.9986 |
| 3971.1849 | 0.9984 |
| 3969.2562 | 0.9982 |
| 3967.3275 | 0.9981 |
| 3965.3988 | 0.9980 |
| 3963.4701 | 0.9980 |
| 3961.5414 | 0.9980 |
| 3959.6127 | 0.9978 |
| 3957.6840 | 0.9976 |
| 3955.7553 | 0.9975 |
| 3953.8266 | 0.9973 |
| 3951.8979 | 0.9973 |
| 3949.9692 | 0.9972 |
| 3948.0405 | 0.9971 |
| 3946.1118 | 0.9969 |
| 3944.1832 | 0.9968 |
| 3942.2545 | 0.9966 |
| 3940.3258 | 0.9964 |
| 3938.3971 | 0.9962 |
| 3936.4684 | 0.9961 |
| 3934.5397 | 0.9962 |
| 3932.6110 | 0.9962 |
| 3930.6823 | 0.9960 |
| 3928.7536 | 0.9958 |
| 3926.8249 | 0.9956 |
| 3924.8962 | 0.9955 |
| 3922.9675 | 0.9953 |
| 3921.0388 | 0.9951 |
| 3919.1101 | 0.9950 |
| 3917.1814 | 0.9949 |

|           |        |
|-----------|--------|
| 3915.2527 | 0.9946 |
| 3913.3240 | 0.9944 |
| 3911.3953 | 0.9942 |
| 3909.4666 | 0.9941 |
| 3907.5379 | 0.9941 |
| 3905.6092 | 0.9942 |
| 3903.6805 | 0.9943 |
| 3901.7518 | 0.9941 |
| 3899.8231 | 0.9938 |
| 3897.8945 | 0.9935 |
| 3895.9658 | 0.9932 |
| 3894.0371 | 0.9930 |
| 3892.1084 | 0.9928 |
| 3890.1797 | 0.9925 |
| 3888.2510 | 0.9924 |
| 3886.3223 | 0.9924 |
| 3884.3936 | 0.9923 |
| 3882.4649 | 0.9921 |
| 3880.5362 | 0.9918 |
| 3878.6075 | 0.9914 |
| 3876.6788 | 0.9912 |
| 3874.7501 | 0.9911 |
| 3872.8214 | 0.9910 |
| 3870.8927 | 0.9908 |
| 3868.9640 | 0.9905 |
| 3867.0353 | 0.9902 |
| 3865.1066 | 0.9900 |
| 3863.1779 | 0.9899 |
| 3861.2492 | 0.9896 |
| 3859.3205 | 0.9893 |
| 3857.3918 | 0.9891 |
| 3855.4631 | 0.9889 |
| 3853.5344 | 0.9886 |
| 3851.6057 | 0.9884 |
| 3849.6771 | 0.9881 |
| 3847.7484 | 0.9878 |
| 3845.8197 | 0.9876 |
| 3843.8910 | 0.9874 |
| 3841.9623 | 0.9872 |
| 3840.0336 | 0.9869 |
| 3838.1049 | 0.9865 |
| 3836.1762 | 0.9862 |
| 3834.2475 | 0.9859 |
| 3832.3188 | 0.9855 |

|           |        |
|-----------|--------|
| 3830.3901 | 0.9852 |
| 3828.4614 | 0.9849 |
| 3826.5327 | 0.9847 |
| 3824.6040 | 0.9843 |
| 3822.6753 | 0.9840 |
| 3820.7466 | 0.9837 |
| 3818.8179 | 0.9835 |
| 3816.8892 | 0.9830 |
| 3814.9605 | 0.9827 |
| 3813.0318 | 0.9823 |
| 3811.1031 | 0.9820 |
| 3809.1744 | 0.9817 |
| 3807.2457 | 0.9813 |
| 3805.3170 | 0.9810 |
| 3803.3884 | 0.9807 |
| 3801.4597 | 0.9803 |
| 3799.5310 | 0.9800 |
| 3797.6023 | 0.9797 |
| 3795.6736 | 0.9793 |
| 3793.7449 | 0.9789 |
| 3791.8162 | 0.9785 |
| 3789.8875 | 0.9782 |
| 3787.9588 | 0.9778 |
| 3786.0301 | 0.9775 |
| 3784.1014 | 0.9770 |
| 3782.1727 | 0.9766 |
| 3780.2440 | 0.9761 |
| 3778.3153 | 0.9757 |
| 3776.3866 | 0.9753 |
| 3774.4579 | 0.9748 |
| 3772.5292 | 0.9744 |
| 3770.6005 | 0.9740 |
| 3768.6718 | 0.9735 |
| 3766.7431 | 0.9731 |
| 3764.8144 | 0.9726 |
| 3762.8857 | 0.9721 |
| 3760.9570 | 0.9717 |
| 3759.0283 | 0.9712 |
| 3757.0996 | 0.9707 |
| 3755.1710 | 0.9701 |
| 3753.2423 | 0.9695 |
| 3751.3136 | 0.9689 |
| 3749.3849 | 0.9683 |
| 3747.4562 | 0.9679 |

|           |        |
|-----------|--------|
| 3745.5275 | 0.9675 |
| 3743.5988 | 0.9671 |
| 3741.6701 | 0.9666 |
| 3739.7414 | 0.9661 |
| 3737.8127 | 0.9657 |
| 3735.8840 | 0.9653 |
| 3733.9553 | 0.9646 |
| 3732.0266 | 0.9637 |
| 3730.0979 | 0.9629 |
| 3728.1692 | 0.9623 |
| 3726.2405 | 0.9618 |
| 3724.3118 | 0.9611 |
| 3722.3831 | 0.9601 |
| 3720.4544 | 0.9592 |
| 3718.5257 | 0.9582 |
| 3716.5970 | 0.9574 |
| 3714.6683 | 0.9566 |
| 3712.7396 | 0.9557 |
| 3710.8109 | 0.9547 |
| 3708.8823 | 0.9537 |
| 3706.9536 | 0.9528 |
| 3705.0249 | 0.9518 |
| 3703.0962 | 0.9507 |
| 3701.1675 | 0.9496 |
| 3699.2388 | 0.9484 |
| 3697.3101 | 0.9473 |
| 3695.3814 | 0.9461 |
| 3693.4527 | 0.9449 |
| 3691.5240 | 0.9436 |
| 3689.5953 | 0.9421 |
| 3687.6666 | 0.9404 |
| 3685.7379 | 0.9388 |
| 3683.8092 | 0.9373 |
| 3681.8805 | 0.9358 |
| 3679.9518 | 0.9342 |
| 3678.0231 | 0.9326 |
| 3676.0944 | 0.9307 |
| 3674.1657 | 0.9288 |
| 3672.2370 | 0.9270 |
| 3670.3083 | 0.9250 |
| 3668.3796 | 0.9228 |
| 3666.4509 | 0.9207 |
| 3664.5222 | 0.9185 |
| 3662.5935 | 0.9162 |

|           |        |
|-----------|--------|
| 3660.6649 | 0.9139 |
| 3658.7362 | 0.9115 |
| 3656.8075 | 0.9089 |
| 3654.8788 | 0.9062 |
| 3652.9501 | 0.9038 |
| 3651.0214 | 0.9013 |
| 3649.0927 | 0.8981 |
| 3647.1640 | 0.8947 |
| 3645.2353 | 0.8916 |
| 3643.3066 | 0.8887 |
| 3641.3779 | 0.8857 |
| 3639.4492 | 0.8825 |
| 3637.5205 | 0.8794 |
| 3635.5918 | 0.8763 |
| 3633.6631 | 0.8731 |
| 3631.7344 | 0.8701 |
| 3629.8057 | 0.8668 |
| 3627.8770 | 0.8627 |
| 3625.9483 | 0.8590 |
| 3624.0196 | 0.8557 |
| 3622.0909 | 0.8524 |
| 3620.1622 | 0.8489 |
| 3618.2335 | 0.8451 |
| 3616.3048 | 0.8416 |
| 3614.3762 | 0.8381 |
| 3612.4475 | 0.8344 |
| 3610.5188 | 0.8306 |
| 3608.5901 | 0.8269 |
| 3606.6614 | 0.8230 |
| 3604.7327 | 0.8193 |
| 3602.8040 | 0.8158 |
| 3600.8753 | 0.8123 |
| 3598.9466 | 0.8087 |
| 3597.0179 | 0.8052 |
| 3595.0892 | 0.8016 |
| 3593.1605 | 0.7978 |
| 3591.2318 | 0.7943 |
| 3589.3031 | 0.7910 |
| 3587.3744 | 0.7874 |
| 3585.4457 | 0.7835 |
| 3583.5170 | 0.7799 |
| 3581.5883 | 0.7765 |
| 3579.6596 | 0.7732 |
| 3577.7309 | 0.7698 |

|           |        |
|-----------|--------|
| 3575.8022 | 0.7665 |
| 3573.8735 | 0.7633 |
| 3571.9448 | 0.7601 |
| 3570.0161 | 0.7572 |
| 3568.0874 | 0.7543 |
| 3566.1588 | 0.7511 |
| 3564.2301 | 0.7477 |
| 3562.3014 | 0.7446 |
| 3560.3727 | 0.7416 |
| 3558.4440 | 0.7386 |
| 3556.5153 | 0.7358 |
| 3554.5866 | 0.7330 |
| 3552.6579 | 0.7302 |
| 3550.7292 | 0.7274 |
| 3548.8005 | 0.7248 |
| 3546.8718 | 0.7222 |
| 3544.9431 | 0.7195 |
| 3543.0144 | 0.7167 |
| 3541.0857 | 0.7141 |
| 3539.1570 | 0.7115 |
| 3537.2283 | 0.7091 |
| 3535.2996 | 0.7067 |
| 3533.3709 | 0.7044 |
| 3531.4422 | 0.7021 |
| 3529.5135 | 0.6999 |
| 3527.5848 | 0.6977 |
| 3525.6561 | 0.6954 |
| 3523.7274 | 0.6931 |
| 3521.7987 | 0.6910 |
| 3519.8701 | 0.6888 |
| 3517.9414 | 0.6867 |
| 3516.0127 | 0.6845 |
| 3514.0840 | 0.6825 |
| 3512.1553 | 0.6805 |
| 3510.2266 | 0.6786 |
| 3508.2979 | 0.6767 |
| 3506.3692 | 0.6748 |
| 3504.4405 | 0.6730 |
| 3502.5118 | 0.6712 |
| 3500.5831 | 0.6693 |
| 3498.6544 | 0.6674 |
| 3496.7257 | 0.6656 |
| 3494.7970 | 0.6640 |
| 3492.8683 | 0.6623 |

|           |        |
|-----------|--------|
| 3490.9396 | 0.6607 |
| 3489.0109 | 0.6590 |
| 3487.0822 | 0.6574 |
| 3485.1535 | 0.6558 |
| 3483.2248 | 0.6543 |
| 3481.2961 | 0.6528 |
| 3479.3674 | 0.6512 |
| 3477.4387 | 0.6497 |
| 3475.5100 | 0.6482 |
| 3473.5813 | 0.6467 |
| 3471.6527 | 0.6452 |
| 3469.7240 | 0.6437 |
| 3467.7953 | 0.6424 |
| 3465.8666 | 0.6411 |
| 3463.9379 | 0.6399 |
| 3462.0092 | 0.6387 |
| 3460.0805 | 0.6375 |
| 3458.1518 | 0.6363 |
| 3456.2231 | 0.6353 |
| 3454.2944 | 0.6342 |
| 3452.3657 | 0.6331 |
| 3450.4370 | 0.6321 |
| 3448.5083 | 0.6311 |
| 3446.5796 | 0.6301 |
| 3444.6509 | 0.6293 |
| 3442.7222 | 0.6284 |
| 3440.7935 | 0.6276 |
| 3438.8648 | 0.6267 |
| 3436.9361 | 0.6259 |
| 3435.0074 | 0.6252 |
| 3433.0787 | 0.6247 |
| 3431.1500 | 0.6242 |
| 3429.2213 | 0.6238 |
| 3427.2926 | 0.6234 |
| 3425.3640 | 0.6230 |
| 3423.4353 | 0.6226 |
| 3421.5066 | 0.6224 |
| 3419.5779 | 0.6221 |
| 3417.6492 | 0.6219 |
| 3415.7205 | 0.6217 |
| 3413.7918 | 0.6215 |
| 3411.8631 | 0.6214 |
| 3409.9344 | 0.6214 |
| 3408.0057 | 0.6214 |

|           |        |
|-----------|--------|
| 3406.0770 | 0.6214 |
| 3404.1483 | 0.6215 |
| 3402.2196 | 0.6216 |
| 3400.2909 | 0.6217 |
| 3398.3622 | 0.6219 |
| 3396.4335 | 0.6222 |
| 3394.5048 | 0.6224 |
| 3392.5761 | 0.6226 |
| 3390.6474 | 0.6229 |
| 3388.7187 | 0.6233 |
| 3386.7900 | 0.6238 |
| 3384.8613 | 0.6242 |
| 3382.9326 | 0.6246 |
| 3381.0039 | 0.6251 |
| 3379.0752 | 0.6257 |
| 3377.1466 | 0.6263 |
| 3375.2179 | 0.6269 |
| 3373.2892 | 0.6276 |
| 3371.3605 | 0.6283 |
| 3369.4318 | 0.6291 |
| 3367.5031 | 0.6299 |
| 3365.5744 | 0.6308 |
| 3363.6457 | 0.6317 |
| 3361.7170 | 0.6326 |
| 3359.7883 | 0.6335 |
| 3357.8596 | 0.6344 |
| 3355.9309 | 0.6353 |
| 3354.0022 | 0.6362 |
| 3352.0735 | 0.6371 |
| 3350.1448 | 0.6381 |
| 3348.2161 | 0.6391 |
| 3346.2874 | 0.6400 |
| 3344.3587 | 0.6410 |
| 3342.4300 | 0.6419 |
| 3340.5013 | 0.6429 |
| 3338.5726 | 0.6440 |
| 3336.6439 | 0.6450 |
| 3334.7152 | 0.6460 |
| 3332.7865 | 0.6469 |
| 3330.8579 | 0.6479 |
| 3328.9292 | 0.6489 |
| 3327.0005 | 0.6498 |
| 3325.0718 | 0.6508 |
| 3323.1431 | 0.6518 |



|           |        |
|-----------|--------|
| 3321.2144 | 0.6527 |
| 3319.2857 | 0.6537 |
| 3317.3570 | 0.6546 |
| 3315.4283 | 0.6555 |
| 3313.4996 | 0.6565 |
| 3311.5709 | 0.6575 |
| 3309.6422 | 0.6585 |
| 3307.7135 | 0.6595 |
| 3305.7848 | 0.6603 |
| 3303.8561 | 0.6611 |
| 3301.9274 | 0.6619 |
| 3299.9987 | 0.6628 |
| 3298.0700 | 0.6637 |
| 3296.1413 | 0.6646 |
| 3294.2126 | 0.6656 |
| 3292.2839 | 0.6665 |
| 3290.3552 | 0.6673 |
| 3288.4265 | 0.6682 |
| 3286.4978 | 0.6691 |
| 3284.5691 | 0.6701 |
| 3282.6405 | 0.6710 |
| 3280.7118 | 0.6720 |
| 3278.7831 | 0.6730 |
| 3276.8544 | 0.6740 |
| 3274.9257 | 0.6752 |
| 3272.9970 | 0.6764 |
| 3271.0683 | 0.6776 |
| 3269.1396 | 0.6786 |
| 3267.2109 | 0.6797 |
| 3265.2822 | 0.6808 |
| 3263.3535 | 0.6819 |
| 3261.4248 | 0.6832 |
| 3259.4961 | 0.6845 |
| 3257.5674 | 0.6858 |
| 3255.6387 | 0.6871 |
| 3253.7100 | 0.6884 |
| 3251.7813 | 0.6896 |
| 3249.8526 | 0.6909 |
| 3247.9239 | 0.6923 |
| 3245.9952 | 0.6937 |
| 3244.0665 | 0.6951 |
| 3242.1378 | 0.6964 |
| 3240.2091 | 0.6977 |
| 3238.2804 | 0.6990 |

|           |        |
|-----------|--------|
| 3236.3518 | 0.7004 |
| 3234.4231 | 0.7019 |
| 3232.4944 | 0.7033 |
| 3230.5657 | 0.7046 |
| 3228.6370 | 0.7060 |
| 3226.7083 | 0.7074 |
| 3224.7796 | 0.7088 |
| 3222.8509 | 0.7102 |
| 3220.9222 | 0.7116 |
| 3218.9935 | 0.7131 |
| 3217.0648 | 0.7146 |
| 3215.1361 | 0.7161 |
| 3213.2074 | 0.7175 |
| 3211.2787 | 0.7189 |
| 3209.3500 | 0.7203 |
| 3207.4213 | 0.7219 |
| 3205.4926 | 0.7234 |
| 3203.5639 | 0.7250 |
| 3201.6352 | 0.7265 |
| 3199.7065 | 0.7280 |
| 3197.7778 | 0.7295 |
| 3195.8491 | 0.7311 |
| 3193.9204 | 0.7327 |
| 3191.9917 | 0.7343 |
| 3190.0630 | 0.7360 |
| 3188.1344 | 0.7376 |
| 3186.2057 | 0.7393 |
| 3184.2770 | 0.7409 |
| 3182.3483 | 0.7426 |
| 3180.4196 | 0.7442 |
| 3178.4909 | 0.7459 |
| 3176.5622 | 0.7476 |
| 3174.6335 | 0.7492 |
| 3172.7048 | 0.7509 |
| 3170.7761 | 0.7524 |
| 3168.8474 | 0.7540 |
| 3166.9187 | 0.7557 |
| 3164.9900 | 0.7575 |
| 3163.0613 | 0.7592 |
| 3161.1326 | 0.7608 |
| 3159.2039 | 0.7624 |
| 3157.2752 | 0.7641 |
| 3155.3465 | 0.7658 |
| 3153.4178 | 0.7675 |

|           |        |
|-----------|--------|
| 3151.4891 | 0.7692 |
| 3149.5604 | 0.7707 |
| 3147.6317 | 0.7723 |
| 3145.7030 | 0.7738 |
| 3143.7743 | 0.7754 |
| 3141.8457 | 0.7770 |
| 3139.9170 | 0.7787 |
| 3137.9883 | 0.7803 |
| 3136.0596 | 0.7818 |
| 3134.1309 | 0.7832 |
| 3132.2022 | 0.7847 |
| 3130.2735 | 0.7862 |
| 3128.3448 | 0.7877 |
| 3126.4161 | 0.7892 |
| 3124.4874 | 0.7907 |
| 3122.5587 | 0.7922 |
| 3120.6300 | 0.7937 |
| 3118.7013 | 0.7952 |
| 3116.7726 | 0.7966 |
| 3114.8439 | 0.7979 |
| 3112.9152 | 0.7993 |
| 3110.9865 | 0.8006 |
| 3109.0578 | 0.8019 |
| 3107.1291 | 0.8032 |
| 3105.2004 | 0.8045 |
| 3103.2717 | 0.8058 |
| 3101.3430 | 0.8072 |
| 3099.4143 | 0.8084 |
| 3097.4856 | 0.8097 |
| 3095.5569 | 0.8109 |
| 3093.6283 | 0.8122 |
| 3091.6996 | 0.8135 |
| 3089.7709 | 0.8147 |
| 3087.8422 | 0.8159 |
| 3085.9135 | 0.8172 |
| 3083.9848 | 0.8185 |
| 3082.0561 | 0.8197 |
| 3080.1274 | 0.8210 |
| 3078.1987 | 0.8222 |
| 3076.2700 | 0.8234 |
| 3074.3413 | 0.8246 |
| 3072.4126 | 0.8258 |
| 3070.4839 | 0.8271 |
| 3068.5552 | 0.8284 |

|           |        |
|-----------|--------|
| 3066.6265 | 0.8297 |
| 3064.6978 | 0.8310 |
| 3062.7691 | 0.8322 |
| 3060.8404 | 0.8335 |
| 3058.9117 | 0.8348 |
| 3056.9830 | 0.8362 |
| 3055.0543 | 0.8376 |
| 3053.1256 | 0.8390 |
| 3051.1969 | 0.8404 |
| 3049.2682 | 0.8417 |
| 3047.3396 | 0.8431 |
| 3045.4109 | 0.8445 |
| 3043.4822 | 0.8459 |
| 3041.5535 | 0.8472 |
| 3039.6248 | 0.8484 |
| 3037.6961 | 0.8497 |
| 3035.7674 | 0.8510 |
| 3033.8387 | 0.8524 |
| 3031.9100 | 0.8537 |
| 3029.9813 | 0.8549 |
| 3028.0526 | 0.8560 |
| 3026.1239 | 0.8572 |
| 3024.1952 | 0.8585 |
| 3022.2665 | 0.8597 |
| 3020.3378 | 0.8609 |
| 3018.4091 | 0.8621 |
| 3016.4804 | 0.8632 |
| 3014.5517 | 0.8642 |
| 3012.6230 | 0.8651 |
| 3010.6943 | 0.8660 |
| 3008.7656 | 0.8667 |
| 3006.8369 | 0.8675 |
| 3004.9082 | 0.8681 |
| 3002.9795 | 0.8687 |
| 3001.0508 | 0.8691 |
| 2999.1222 | 0.8694 |
| 2997.1935 | 0.8695 |
| 2995.2648 | 0.8696 |
| 2993.3361 | 0.8695 |
| 2991.4074 | 0.8692 |
| 2989.4787 | 0.8686 |
| 2987.5500 | 0.8679 |
| 2985.6213 | 0.8671 |
| 2983.6926 | 0.8662 |

|           |        |
|-----------|--------|
| 2981.7639 | 0.8653 |
| 2979.8352 | 0.8643 |
| 2977.9065 | 0.8630 |
| 2975.9778 | 0.8616 |
| 2974.0491 | 0.8601 |
| 2972.1204 | 0.8586 |
| 2970.1917 | 0.8569 |
| 2968.2630 | 0.8553 |
| 2966.3343 | 0.8537 |
| 2964.4056 | 0.8522 |
| 2962.4769 | 0.8507 |
| 2960.5482 | 0.8493 |
| 2958.6195 | 0.8480 |
| 2956.6908 | 0.8468 |
| 2954.7621 | 0.8456 |
| 2952.8335 | 0.8443 |
| 2950.9048 | 0.8427 |
| 2948.9761 | 0.8409 |
| 2947.0474 | 0.8388 |
| 2945.1187 | 0.8366 |
| 2943.1900 | 0.8342 |
| 2941.2613 | 0.8319 |
| 2939.3326 | 0.8298 |
| 2937.4039 | 0.8280 |
| 2935.4752 | 0.8265 |
| 2933.5465 | 0.8254 |
| 2931.6178 | 0.8246 |
| 2929.6891 | 0.8242 |
| 2927.7604 | 0.8241 |
| 2925.8317 | 0.8243 |
| 2923.9030 | 0.8249 |
| 2921.9743 | 0.8260 |
| 2920.0456 | 0.8275 |
| 2918.1169 | 0.8295 |
| 2916.1882 | 0.8318 |
| 2914.2595 | 0.8342 |
| 2912.3308 | 0.8366 |
| 2910.4021 | 0.8386 |
| 2908.4734 | 0.8404 |
| 2906.5447 | 0.8419 |
| 2904.6161 | 0.8432 |
| 2902.6874 | 0.8444 |
| 2900.7587 | 0.8455 |
| 2898.8300 | 0.8465 |

|           |        |
|-----------|--------|
| 2896.9013 | 0.8474 |
| 2894.9726 | 0.8483 |
| 2893.0439 | 0.8491 |
| 2891.1152 | 0.8499 |
| 2889.1865 | 0.8508 |
| 2887.2578 | 0.8518 |
| 2885.3291 | 0.8527 |
| 2883.4004 | 0.8537 |
| 2881.4717 | 0.8548 |
| 2879.5430 | 0.8560 |
| 2877.6143 | 0.8574 |
| 2875.6856 | 0.8589 |
| 2873.7569 | 0.8605 |
| 2871.8282 | 0.8623 |
| 2869.8995 | 0.8641 |
| 2867.9708 | 0.8659 |
| 2866.0421 | 0.8678 |
| 2864.1134 | 0.8696 |
| 2862.1847 | 0.8712 |
| 2860.2560 | 0.8726 |
| 2858.3274 | 0.8738 |
| 2856.3987 | 0.8749 |
| 2854.4700 | 0.8761 |
| 2852.5413 | 0.8775 |
| 2850.6126 | 0.8793 |
| 2848.6839 | 0.8815 |
| 2846.7552 | 0.8840 |
| 2844.8265 | 0.8863 |
| 2842.8978 | 0.8884 |
| 2840.9691 | 0.8904 |
| 2839.0404 | 0.8922 |
| 2837.1117 | 0.8938 |
| 2835.1830 | 0.8953 |
| 2833.2543 | 0.8966 |
| 2831.3256 | 0.8978 |
| 2829.3969 | 0.8990 |
| 2827.4682 | 0.9001 |
| 2825.5395 | 0.9013 |
| 2823.6108 | 0.9025 |
| 2821.6821 | 0.9037 |
| 2819.7534 | 0.9048 |
| 2817.8247 | 0.9058 |
| 2815.8960 | 0.9068 |
| 2813.9673 | 0.9078 |

|           |        |
|-----------|--------|
| 2812.0387 | 0.9089 |
| 2810.1100 | 0.9099 |
| 2808.1813 | 0.9109 |
| 2806.2526 | 0.9118 |
| 2804.3239 | 0.9126 |
| 2802.3952 | 0.9135 |
| 2800.4665 | 0.9145 |
| 2798.5378 | 0.9154 |
| 2796.6091 | 0.9163 |
| 2794.6804 | 0.9171 |
| 2792.7517 | 0.9179 |
| 2790.8230 | 0.9186 |
| 2788.8943 | 0.9193 |
| 2786.9656 | 0.9199 |
| 2785.0369 | 0.9206 |
| 2783.1082 | 0.9213 |
| 2781.1795 | 0.9220 |
| 2779.2508 | 0.9226 |
| 2777.3221 | 0.9232 |
| 2775.3934 | 0.9237 |
| 2773.4647 | 0.9243 |
| 2771.5360 | 0.9249 |
| 2769.6073 | 0.9254 |
| 2767.6786 | 0.9260 |
| 2765.7499 | 0.9265 |
| 2763.8213 | 0.9269 |
| 2761.8926 | 0.9273 |
| 2759.9639 | 0.9278 |
| 2758.0352 | 0.9284 |
| 2756.1065 | 0.9289 |
| 2754.1778 | 0.9295 |
| 2752.2491 | 0.9300 |
| 2750.3204 | 0.9304 |
| 2748.3917 | 0.9308 |
| 2746.4630 | 0.9312 |
| 2744.5343 | 0.9316 |
| 2742.6056 | 0.9321 |
| 2740.6769 | 0.9326 |
| 2738.7482 | 0.9331 |
| 2736.8195 | 0.9335 |
| 2734.8908 | 0.9339 |
| 2732.9621 | 0.9344 |
| 2731.0334 | 0.9349 |
| 2729.1047 | 0.9355 |

|           |        |
|-----------|--------|
| 2727.1760 | 0.9360 |
| 2725.2473 | 0.9365 |
| 2723.3186 | 0.9369 |
| 2721.3899 | 0.9373 |
| 2719.4612 | 0.9377 |
| 2717.5326 | 0.9383 |
| 2715.6039 | 0.9388 |
| 2713.6752 | 0.9393 |
| 2711.7465 | 0.9398 |
| 2709.8178 | 0.9402 |
| 2707.8891 | 0.9407 |
| 2705.9604 | 0.9411 |
| 2704.0317 | 0.9416 |
| 2702.1030 | 0.9421 |
| 2700.1743 | 0.9427 |
| 2698.2456 | 0.9432 |
| 2696.3169 | 0.9436 |
| 2694.3882 | 0.9441 |
| 2692.4595 | 0.9446 |
| 2690.5308 | 0.9451 |
| 2688.6021 | 0.9456 |
| 2686.6734 | 0.9461 |
| 2684.7447 | 0.9466 |
| 2682.8160 | 0.9471 |
| 2680.8873 | 0.9477 |
| 2678.9586 | 0.9483 |
| 2677.0299 | 0.9488 |
| 2675.1012 | 0.9493 |
| 2673.1725 | 0.9499 |
| 2671.2438 | 0.9503 |
| 2669.3152 | 0.9508 |
| 2667.3865 | 0.9514 |
| 2665.4578 | 0.9520 |
| 2663.5291 | 0.9526 |
| 2661.6004 | 0.9532 |
| 2659.6717 | 0.9538 |
| 2657.7430 | 0.9544 |
| 2655.8143 | 0.9550 |
| 2653.8856 | 0.9556 |
| 2651.9569 | 0.9562 |
| 2650.0282 | 0.9569 |
| 2648.0995 | 0.9575 |
| 2646.1708 | 0.9581 |
| 2644.2421 | 0.9587 |



|           |        |
|-----------|--------|
| 2642.3134 | 0.9593 |
| 2640.3847 | 0.9599 |
| 2638.4560 | 0.9606 |
| 2636.5273 | 0.9612 |
| 2634.5986 | 0.9619 |
| 2632.6699 | 0.9624 |
| 2630.7412 | 0.9629 |
| 2628.8125 | 0.9635 |
| 2626.8838 | 0.9640 |
| 2624.9551 | 0.9646 |
| 2623.0265 | 0.9652 |
| 2621.0978 | 0.9658 |
| 2619.1691 | 0.9663 |
| 2617.2404 | 0.9667 |
| 2615.3117 | 0.9671 |
| 2613.3830 | 0.9676 |
| 2611.4543 | 0.9681 |
| 2609.5256 | 0.9686 |
| 2607.5969 | 0.9690 |
| 2605.6682 | 0.9695 |
| 2603.7395 | 0.9699 |
| 2601.8108 | 0.9702 |
| 2599.8821 | 0.9706 |
| 2597.9534 | 0.9710 |
| 2596.0247 | 0.9714 |
| 2594.0960 | 0.9718 |
| 2592.1673 | 0.9721 |
| 2590.2386 | 0.9724 |
| 2588.3099 | 0.9727 |
| 2586.3812 | 0.9730 |
| 2584.4525 | 0.9734 |
| 2582.5238 | 0.9737 |
| 2580.5951 | 0.9740 |
| 2578.6664 | 0.9743 |
| 2576.7377 | 0.9745 |
| 2574.8091 | 0.9748 |
| 2572.8804 | 0.9751 |
| 2570.9517 | 0.9754 |
| 2569.0230 | 0.9757 |
| 2567.0943 | 0.9760 |
| 2565.1656 | 0.9762 |
| 2563.2369 | 0.9765 |
| 2561.3082 | 0.9767 |
| 2559.3795 | 0.9770 |

|           |        |
|-----------|--------|
| 2557.4508 | 0.9773 |
| 2555.5221 | 0.9775 |
| 2553.5934 | 0.9778 |
| 2551.6647 | 0.9780 |
| 2549.7360 | 0.9782 |
| 2547.8073 | 0.9784 |
| 2545.8786 | 0.9787 |
| 2543.9499 | 0.9789 |
| 2542.0212 | 0.9792 |
| 2540.0925 | 0.9794 |
| 2538.1638 | 0.9797 |
| 2536.2351 | 0.9799 |
| 2534.3064 | 0.9801 |
| 2532.3777 | 0.9803 |
| 2530.4490 | 0.9806 |
| 2528.5204 | 0.9808 |
| 2526.5917 | 0.9810 |
| 2524.6630 | 0.9812 |
| 2522.7343 | 0.9814 |
| 2520.8056 | 0.9816 |
| 2518.8769 | 0.9818 |
| 2516.9482 | 0.9820 |
| 2515.0195 | 0.9822 |
| 2513.0908 | 0.9825 |
| 2511.1621 | 0.9827 |
| 2509.2334 | 0.9829 |
| 2507.3047 | 0.9831 |
| 2505.3760 | 0.9833 |
| 2503.4473 | 0.9835 |
| 2501.5186 | 0.9837 |
| 2499.5899 | 0.9840 |
| 2497.6612 | 0.9842 |
| 2495.7325 | 0.9844 |
| 2493.8038 | 0.9847 |
| 2491.8751 | 0.9849 |
| 2489.9464 | 0.9851 |
| 2488.0177 | 0.9853 |
| 2486.0890 | 0.9856 |
| 2484.1603 | 0.9859 |
| 2482.2316 | 0.9861 |
| 2480.3030 | 0.9864 |
| 2478.3743 | 0.9866 |
| 2476.4456 | 0.9869 |
| 2474.5169 | 0.9871 |

|           |        |
|-----------|--------|
| 2472.5882 | 0.9874 |
| 2470.6595 | 0.9876 |
| 2468.7308 | 0.9879 |
| 2466.8021 | 0.9882 |
| 2464.8734 | 0.9885 |
| 2462.9447 | 0.9887 |
| 2461.0160 | 0.9889 |
| 2459.0873 | 0.9892 |
| 2457.1586 | 0.9894 |
| 2455.2299 | 0.9897 |
| 2453.3012 | 0.9900 |
| 2451.3725 | 0.9902 |
| 2449.4438 | 0.9904 |
| 2447.5151 | 0.9907 |
| 2445.5864 | 0.9909 |
| 2443.6577 | 0.9912 |
| 2441.7290 | 0.9914 |
| 2439.8003 | 0.9917 |
| 2437.8716 | 0.9919 |
| 2435.9429 | 0.9921 |
| 2434.0143 | 0.9923 |
| 2432.0856 | 0.9926 |
| 2430.1569 | 0.9928 |
| 2428.2282 | 0.9930 |
| 2426.2995 | 0.9932 |
| 2424.3708 | 0.9934 |
| 2422.4421 | 0.9937 |
| 2420.5134 | 0.9939 |
| 2418.5847 | 0.9941 |
| 2416.6560 | 0.9942 |
| 2414.7273 | 0.9944 |
| 2412.7986 | 0.9946 |
| 2410.8699 | 0.9948 |
| 2408.9412 | 0.9950 |
| 2407.0125 | 0.9952 |
| 2405.0838 | 0.9953 |
| 2403.1551 | 0.9955 |
| 2401.2264 | 0.9956 |
| 2399.2977 | 0.9957 |
| 2397.3690 | 0.9958 |
| 2395.4403 | 0.9960 |
| 2393.5116 | 0.9962 |
| 2391.5829 | 0.9964 |
| 2389.6542 | 0.9965 |

|           |        |
|-----------|--------|
| 2387.7255 | 0.9967 |
| 2385.7969 | 0.9970 |
| 2383.8682 | 0.9974 |
| 2381.9395 | 0.9980 |
| 2380.0108 | 0.9986 |
| 2378.0821 | 0.9993 |
| 2376.1534 | 1.0000 |
| 2374.2247 | 1.0006 |
| 2372.2960 | 1.0013 |
| 2370.3673 | 1.0022 |
| 2368.4386 | 1.0031 |
| 2366.5099 | 1.0041 |
| 2364.5812 | 1.0050 |
| 2362.6525 | 1.0055 |
| 2360.7238 | 1.0058 |
| 2358.7951 | 1.0058 |
| 2356.8664 | 1.0055 |
| 2354.9377 | 1.0050 |
| 2353.0090 | 1.0043 |
| 2351.0803 | 1.0035 |
| 2349.1516 | 1.0030 |
| 2347.2229 | 1.0029 |
| 2345.2942 | 1.0034 |
| 2343.3655 | 1.0042 |
| 2341.4368 | 1.0046 |
| 2339.5082 | 1.0046 |
| 2337.5795 | 1.0046 |
| 2335.6508 | 1.0046 |
| 2333.7221 | 1.0045 |
| 2331.7934 | 1.0044 |
| 2329.8647 | 1.0045 |
| 2327.9360 | 1.0045 |
| 2326.0073 | 1.0043 |
| 2324.0786 | 1.0042 |
| 2322.1499 | 1.0039 |
| 2320.2212 | 1.0036 |
| 2318.2925 | 1.0032 |
| 2316.3638 | 1.0030 |
| 2314.4351 | 1.0028 |
| 2312.5064 | 1.0027 |
| 2310.5777 | 1.0026 |
| 2308.6490 | 1.0023 |
| 2306.7203 | 1.0020 |
| 2304.7916 | 1.0017 |

|           |        |
|-----------|--------|
| 2302.8629 | 1.0016 |
| 2300.9342 | 1.0015 |
| 2299.0055 | 1.0015 |
| 2297.0768 | 1.0013 |
| 2295.1481 | 1.0011 |
| 2293.2194 | 1.0009 |
| 2291.2908 | 1.0008 |
| 2289.3621 | 1.0007 |
| 2287.4334 | 1.0007 |
| 2285.5047 | 1.0006 |
| 2283.5760 | 1.0005 |
| 2281.6473 | 1.0004 |
| 2279.7186 | 1.0004 |
| 2277.7899 | 1.0004 |
| 2275.8612 | 1.0005 |
| 2273.9325 | 1.0005 |
| 2272.0038 | 1.0005 |
| 2270.0751 | 1.0005 |
| 2268.1464 | 1.0004 |
| 2266.2177 | 1.0003 |
| 2264.2890 | 1.0003 |
| 2262.3603 | 1.0003 |
| 2260.4316 | 1.0003 |
| 2258.5029 | 1.0003 |
| 2256.5742 | 1.0002 |
| 2254.6455 | 1.0001 |
| 2252.7168 | 1.0000 |
| 2250.7881 | 1.0000 |
| 2248.8594 | 1.0000 |
| 2246.9307 | 1.0000 |
| 2245.0021 | 0.9999 |
| 2243.0734 | 0.9998 |
| 2241.1447 | 0.9998 |
| 2239.2160 | 0.9997 |
| 2237.2873 | 0.9998 |
| 2235.3586 | 0.9999 |
| 2233.4299 | 0.9999 |
| 2231.5012 | 0.9998 |
| 2229.5725 | 0.9996 |
| 2227.6438 | 0.9995 |
| 2225.7151 | 0.9995 |
| 2223.7864 | 0.9995 |
| 2221.8577 | 0.9995 |
| 2219.9290 | 0.9995 |

|           |        |
|-----------|--------|
| 2218.0003 | 0.9994 |
| 2216.0716 | 0.9992 |
| 2214.1429 | 0.9991 |
| 2212.2142 | 0.9991 |
| 2210.2855 | 0.9990 |
| 2208.3568 | 0.9990 |
| 2206.4281 | 0.9989 |
| 2204.4994 | 0.9988 |
| 2202.5707 | 0.9986 |
| 2200.6420 | 0.9985 |
| 2198.7133 | 0.9985 |
| 2196.7847 | 0.9985 |
| 2194.8560 | 0.9985 |
| 2192.9273 | 0.9984 |
| 2190.9986 | 0.9983 |
| 2189.0699 | 0.9981 |
| 2187.1412 | 0.9980 |
| 2185.2125 | 0.9979 |
| 2183.2838 | 0.9979 |
| 2181.3551 | 0.9980 |
| 2179.4264 | 0.9979 |
| 2177.4977 | 0.9977 |
| 2175.5690 | 0.9975 |
| 2173.6403 | 0.9974 |
| 2171.7116 | 0.9973 |
| 2169.7829 | 0.9973 |
| 2167.8542 | 0.9973 |
| 2165.9255 | 0.9972 |
| 2163.9968 | 0.9971 |
| 2162.0681 | 0.9970 |
| 2160.1394 | 0.9969 |
| 2158.2107 | 0.9969 |
| 2156.2820 | 0.9969 |
| 2154.3533 | 0.9969 |
| 2152.4246 | 0.9969 |
| 2150.4960 | 0.9968 |
| 2148.5673 | 0.9967 |
| 2146.6386 | 0.9967 |
| 2144.7099 | 0.9967 |
| 2142.7812 | 0.9968 |
| 2140.8525 | 0.9968 |
| 2138.9238 | 0.9968 |
| 2136.9951 | 0.9966 |
| 2135.0664 | 0.9965 |

|           |        |
|-----------|--------|
| 2133.1377 | 0.9965 |
| 2131.2090 | 0.9967 |
| 2129.2803 | 0.9968 |
| 2127.3516 | 0.9969 |
| 2125.4229 | 0.9968 |
| 2123.4942 | 0.9967 |
| 2121.5655 | 0.9966 |
| 2119.6368 | 0.9966 |
| 2117.7081 | 0.9966 |
| 2115.7794 | 0.9968 |
| 2113.8507 | 0.9969 |
| 2111.9220 | 0.9969 |
| 2109.9933 | 0.9968 |
| 2108.0646 | 0.9966 |
| 2106.1359 | 0.9966 |
| 2104.2072 | 0.9966 |
| 2102.2786 | 0.9967 |
| 2100.3499 | 0.9967 |
| 2098.4212 | 0.9968 |
| 2096.4925 | 0.9967 |
| 2094.5638 | 0.9967 |
| 2092.6351 | 0.9967 |
| 2090.7064 | 0.9967 |
| 2088.7777 | 0.9967 |
| 2086.8490 | 0.9967 |
| 2084.9203 | 0.9967 |
| 2082.9916 | 0.9967 |
| 2081.0629 | 0.9967 |
| 2079.1342 | 0.9967 |
| 2077.2055 | 0.9968 |
| 2075.2768 | 0.9968 |
| 2073.3481 | 0.9968 |
| 2071.4194 | 0.9968 |
| 2069.4907 | 0.9968 |
| 2067.5620 | 0.9968 |
| 2065.6333 | 0.9969 |
| 2063.7046 | 0.9969 |
| 2061.7759 | 0.9970 |
| 2059.8472 | 0.9970 |
| 2057.9185 | 0.9970 |
| 2055.9899 | 0.9970 |
| 2054.0612 | 0.9970 |
| 2052.1325 | 0.9971 |
| 2050.2038 | 0.9972 |

|           |        |
|-----------|--------|
| 2048.2751 | 0.9973 |
| 2046.3464 | 0.9974 |
| 2044.4177 | 0.9975 |
| 2042.4890 | 0.9976 |
| 2040.5603 | 0.9977 |
| 2038.6316 | 0.9977 |
| 2036.7029 | 0.9978 |
| 2034.7742 | 0.9980 |
| 2032.8455 | 0.9981 |
| 2030.9168 | 0.9983 |
| 2028.9881 | 0.9984 |
| 2027.0594 | 0.9985 |
| 2025.1307 | 0.9986 |
| 2023.2020 | 0.9987 |
| 2021.2733 | 0.9988 |
| 2019.3446 | 0.9990 |
| 2017.4159 | 0.9992 |
| 2015.4872 | 0.9993 |
| 2013.5585 | 0.9993 |
| 2011.6298 | 0.9994 |
| 2009.7011 | 0.9994 |
| 2007.7725 | 0.9995 |
| 2005.8438 | 0.9996 |
| 2003.9151 | 0.9997 |
| 2001.9864 | 0.9998 |
| 2000.0577 | 0.9998 |
| 1998.1290 | 0.9998 |
| 1996.2003 | 0.9999 |
| 1994.2716 | 0.9999 |
| 1992.3429 | 1.0000 |
| 1990.4142 | 1.0000 |
| 1988.4855 | 1.0000 |
| 1986.5568 | 1.0000 |
| 1984.6281 | 1.0000 |
| 1982.6994 | 1.0000 |
| 1980.7707 | 1.0000 |
| 1978.8420 | 1.0001 |
| 1976.9133 | 1.0001 |
| 1974.9846 | 1.0001 |
| 1973.0559 | 1.0001 |
| 1971.1272 | 1.0001 |
| 1969.1985 | 1.0001 |
| 1967.2698 | 1.0002 |
| 1965.3411 | 1.0002 |



|           |        |
|-----------|--------|
| 1963.4124 | 1.0002 |
| 1961.4838 | 1.0002 |
| 1959.5551 | 1.0001 |
| 1957.6264 | 1.0000 |
| 1955.6977 | 1.0000 |
| 1953.7690 | 1.0000 |
| 1951.8403 | 1.0001 |
| 1949.9116 | 1.0002 |
| 1947.9829 | 1.0002 |
| 1946.0542 | 1.0001 |
| 1944.1255 | 1.0001 |
| 1942.1968 | 1.0001 |
| 1940.2681 | 1.0001 |
| 1938.3394 | 1.0000 |
| 1936.4107 | 1.0001 |
| 1934.4820 | 1.0001 |
| 1932.5533 | 1.0000 |
| 1930.6246 | 0.9998 |
| 1928.6959 | 0.9998 |
| 1926.7672 | 0.9998 |
| 1924.8385 | 0.9999 |
| 1922.9098 | 1.0000 |
| 1920.9811 | 1.0000 |
| 1919.0524 | 0.9999 |
| 1917.1237 | 0.9999 |
| 1915.1950 | 0.9998 |
| 1913.2664 | 0.9998 |
| 1911.3377 | 0.9999 |
| 1909.4090 | 1.0000 |
| 1907.4803 | 1.0000 |
| 1905.5516 | 0.9999 |
| 1903.6229 | 0.9998 |
| 1901.6942 | 0.9997 |
| 1899.7655 | 0.9997 |
| 1897.8368 | 0.9998 |
| 1895.9081 | 0.9998 |
| 1893.9794 | 0.9998 |
| 1892.0507 | 0.9997 |
| 1890.1220 | 0.9996 |
| 1888.1933 | 0.9996 |
| 1886.2646 | 0.9995 |
| 1884.3359 | 0.9994 |
| 1882.4072 | 0.9994 |
| 1880.4785 | 0.9993 |

|           |        |
|-----------|--------|
| 1878.5498 | 0.9992 |
| 1876.6211 | 0.9990 |
| 1874.6924 | 0.9989 |
| 1872.7637 | 0.9989 |
| 1870.8350 | 0.9990 |
| 1868.9063 | 0.9990 |
| 1866.9777 | 0.9988 |
| 1865.0490 | 0.9985 |
| 1863.1203 | 0.9983 |
| 1861.1916 | 0.9982 |
| 1859.2629 | 0.9981 |
| 1857.3342 | 0.9980 |
| 1855.4055 | 0.9978 |
| 1853.4768 | 0.9976 |
| 1851.5481 | 0.9973 |
| 1849.6194 | 0.9972 |
| 1847.6907 | 0.9971 |
| 1845.7620 | 0.9971 |
| 1843.8333 | 0.9971 |
| 1841.9046 | 0.9969 |
| 1839.9759 | 0.9965 |
| 1838.0472 | 0.9962 |
| 1836.1185 | 0.9959 |
| 1834.1898 | 0.9957 |
| 1832.2611 | 0.9956 |
| 1830.3324 | 0.9955 |
| 1828.4037 | 0.9952 |
| 1826.4750 | 0.9949 |
| 1824.5463 | 0.9945 |
| 1822.6176 | 0.9941 |
| 1820.6889 | 0.9938 |
| 1818.7603 | 0.9936 |
| 1816.8316 | 0.9934 |
| 1814.9029 | 0.9930 |
| 1812.9742 | 0.9926 |
| 1811.0455 | 0.9922 |
| 1809.1168 | 0.9918 |
| 1807.1881 | 0.9914 |
| 1805.2594 | 0.9911 |
| 1803.3307 | 0.9908 |
| 1801.4020 | 0.9903 |
| 1799.4733 | 0.9897 |
| 1797.5446 | 0.9891 |
| 1795.6159 | 0.9886 |

|           |        |
|-----------|--------|
| 1793.6872 | 0.9882 |
| 1791.7585 | 0.9878 |
| 1789.8298 | 0.9872 |
| 1787.9011 | 0.9865 |
| 1785.9724 | 0.9858 |
| 1784.0437 | 0.9852 |
| 1782.1150 | 0.9845 |
| 1780.1863 | 0.9840 |
| 1778.2576 | 0.9833 |
| 1776.3289 | 0.9825 |
| 1774.4002 | 0.9816 |
| 1772.4716 | 0.9806 |
| 1770.5429 | 0.9798 |
| 1768.6142 | 0.9790 |
| 1766.6855 | 0.9782 |
| 1764.7568 | 0.9771 |
| 1762.8281 | 0.9760 |
| 1760.8994 | 0.9746 |
| 1758.9707 | 0.9732 |
| 1757.0420 | 0.9717 |
| 1755.1133 | 0.9702 |
| 1753.1846 | 0.9687 |
| 1751.2559 | 0.9670 |
| 1749.3272 | 0.9650 |
| 1747.3985 | 0.9627 |
| 1745.4698 | 0.9606 |
| 1743.5411 | 0.9585 |
| 1741.6124 | 0.9563 |
| 1739.6837 | 0.9542 |
| 1737.7550 | 0.9524 |
| 1735.8263 | 0.9507 |
| 1733.8976 | 0.9486 |
| 1731.9689 | 0.9465 |
| 1730.0402 | 0.9446 |
| 1728.1115 | 0.9426 |
| 1726.1828 | 0.9407 |
| 1724.2542 | 0.9389 |
| 1722.3255 | 0.9370 |
| 1720.3968 | 0.9351 |
| 1718.4681 | 0.9330 |
| 1716.5394 | 0.9304 |
| 1714.6107 | 0.9276 |
| 1712.6820 | 0.9248 |
| 1710.7533 | 0.9218 |

|           |        |
|-----------|--------|
| 1708.8246 | 0.9186 |
| 1706.8959 | 0.9147 |
| 1704.9672 | 0.9100 |
| 1703.0385 | 0.9055 |
| 1701.1098 | 0.8998 |
| 1699.1811 | 0.8924 |
| 1697.2524 | 0.8857 |
| 1695.3237 | 0.8789 |
| 1693.3950 | 0.8727 |
| 1691.4663 | 0.8673 |
| 1689.5376 | 0.8614 |
| 1687.6089 | 0.8556 |
| 1685.6802 | 0.8495 |
| 1683.7515 | 0.8416 |
| 1681.8228 | 0.8348 |
| 1679.8941 | 0.8298 |
| 1677.9655 | 0.8249 |
| 1676.0368 | 0.8196 |
| 1674.1081 | 0.8142 |
| 1672.1794 | 0.8097 |
| 1670.2507 | 0.8054 |
| 1668.3220 | 0.8010 |
| 1666.3933 | 0.7975 |
| 1664.4646 | 0.7946 |
| 1662.5359 | 0.7916 |
| 1660.6072 | 0.7889 |
| 1658.6785 | 0.7866 |
| 1656.7498 | 0.7847 |
| 1654.8211 | 0.7830 |
| 1652.8924 | 0.7818 |
| 1650.9637 | 0.7810 |
| 1649.0350 | 0.7802 |
| 1647.1063 | 0.7796 |
| 1645.1776 | 0.7792 |
| 1643.2489 | 0.7789 |
| 1641.3202 | 0.7787 |
| 1639.3915 | 0.7788 |
| 1637.4628 | 0.7791 |
| 1635.5341 | 0.7802 |
| 1633.6054 | 0.7815 |
| 1631.6767 | 0.7823 |
| 1629.7481 | 0.7834 |
| 1627.8194 | 0.7854 |
| 1625.8907 | 0.7877 |

|           |        |
|-----------|--------|
| 1623.9620 | 0.7907 |
| 1622.0333 | 0.7942 |
| 1620.1046 | 0.7970 |
| 1618.1759 | 0.7999 |
| 1616.2472 | 0.8043 |
| 1614.3185 | 0.8085 |
| 1612.3898 | 0.8116 |
| 1610.4611 | 0.8147 |
| 1608.5324 | 0.8179 |
| 1606.6037 | 0.8208 |
| 1604.6750 | 0.8234 |
| 1602.7463 | 0.8259 |
| 1600.8176 | 0.8284 |
| 1598.8889 | 0.8308 |
| 1596.9602 | 0.8332 |
| 1595.0315 | 0.8356 |
| 1593.1028 | 0.8380 |
| 1591.1741 | 0.8402 |
| 1589.2454 | 0.8425 |
| 1587.3167 | 0.8447 |
| 1585.3880 | 0.8470 |
| 1583.4594 | 0.8492 |
| 1581.5307 | 0.8512 |
| 1579.6020 | 0.8530 |
| 1577.6733 | 0.8550 |
| 1575.7446 | 0.8578 |
| 1573.8159 | 0.8603 |
| 1571.8872 | 0.8620 |
| 1569.9585 | 0.8641 |
| 1568.0298 | 0.8665 |
| 1566.1011 | 0.8683 |
| 1564.1724 | 0.8697 |
| 1562.2437 | 0.8707 |
| 1560.3150 | 0.8720 |
| 1558.3863 | 0.8746 |
| 1556.4576 | 0.8763 |
| 1554.5289 | 0.8770 |
| 1552.6002 | 0.8776 |
| 1550.6715 | 0.8785 |
| 1548.7428 | 0.8795 |
| 1546.8141 | 0.8804 |
| 1544.8854 | 0.8815 |
| 1542.9567 | 0.8827 |
| 1541.0280 | 0.8841 |

|           |        |
|-----------|--------|
| 1539.0993 | 0.8861 |
| 1537.1706 | 0.8875 |
| 1535.2420 | 0.8886 |
| 1533.3133 | 0.8904 |
| 1531.3846 | 0.8924 |
| 1529.4559 | 0.8939 |
| 1527.5272 | 0.8956 |
| 1525.5985 | 0.8976 |
| 1523.6698 | 0.8993 |
| 1521.7411 | 0.9015 |
| 1519.8124 | 0.9038 |
| 1517.8837 | 0.9059 |
| 1515.9550 | 0.9084 |
| 1514.0263 | 0.9109 |
| 1512.0976 | 0.9133 |
| 1510.1689 | 0.9158 |
| 1508.2402 | 0.9187 |
| 1506.3115 | 0.9224 |
| 1504.3828 | 0.9248 |
| 1502.4541 | 0.9258 |
| 1500.5254 | 0.9268 |
| 1498.5967 | 0.9279 |
| 1496.6680 | 0.9292 |
| 1494.7393 | 0.9301 |
| 1492.8106 | 0.9305 |
| 1490.8819 | 0.9306 |
| 1488.9533 | 0.9302 |
| 1487.0246 | 0.9290 |
| 1485.0959 | 0.9273 |
| 1483.1672 | 0.9254 |
| 1481.2385 | 0.9229 |
| 1479.3098 | 0.9200 |
| 1477.3811 | 0.9167 |
| 1475.4524 | 0.9128 |
| 1473.5237 | 0.9080 |
| 1471.5950 | 0.9026 |
| 1469.6663 | 0.8984 |
| 1467.7376 | 0.8952 |
| 1465.8089 | 0.8921 |
| 1463.8802 | 0.8889 |
| 1461.9515 | 0.8864 |
| 1460.0228 | 0.8844 |
| 1458.0941 | 0.8825 |
| 1456.1654 | 0.8810 |

|           |        |
|-----------|--------|
| 1454.2367 | 0.8800 |
| 1452.3080 | 0.8793 |
| 1450.3793 | 0.8788 |
| 1448.4506 | 0.8783 |
| 1446.5219 | 0.8777 |
| 1444.5932 | 0.8769 |
| 1442.6645 | 0.8760 |
| 1440.7359 | 0.8749 |
| 1438.8072 | 0.8736 |
| 1436.8785 | 0.8720 |
| 1434.9498 | 0.8700 |
| 1433.0211 | 0.8679 |
| 1431.0924 | 0.8657 |
| 1429.1637 | 0.8632 |
| 1427.2350 | 0.8606 |
| 1425.3063 | 0.8581 |
| 1423.3776 | 0.8557 |
| 1421.4489 | 0.8535 |
| 1419.5202 | 0.8515 |
| 1417.5915 | 0.8497 |
| 1415.6628 | 0.8483 |
| 1413.7341 | 0.8472 |
| 1411.8054 | 0.8464 |
| 1409.8767 | 0.8460 |
| 1407.9480 | 0.8460 |
| 1406.0193 | 0.8465 |
| 1404.0906 | 0.8474 |
| 1402.1619 | 0.8486 |
| 1400.2332 | 0.8500 |
| 1398.3045 | 0.8518 |
| 1396.3758 | 0.8536 |
| 1394.4472 | 0.8555 |
| 1392.5185 | 0.8572 |
| 1390.5898 | 0.8585 |
| 1388.6611 | 0.8598 |
| 1386.7324 | 0.8607 |
| 1384.8037 | 0.8616 |
| 1382.8750 | 0.8629 |
| 1380.9463 | 0.8647 |
| 1379.0176 | 0.8664 |
| 1377.0889 | 0.8677 |
| 1375.1602 | 0.8690 |
| 1373.2315 | 0.8703 |
| 1371.3028 | 0.8714 |

|           |        |
|-----------|--------|
| 1369.3741 | 0.8727 |
| 1367.4454 | 0.8741 |
| 1365.5167 | 0.8758 |
| 1363.5880 | 0.8777 |
| 1361.6593 | 0.8797 |
| 1359.7306 | 0.8812 |
| 1357.8019 | 0.8825 |
| 1355.8732 | 0.8837 |
| 1353.9445 | 0.8850 |
| 1352.0158 | 0.8864 |
| 1350.0871 | 0.8878 |
| 1348.1585 | 0.8893 |
| 1346.2298 | 0.8905 |
| 1344.3011 | 0.8916 |
| 1342.3724 | 0.8926 |
| 1340.4437 | 0.8936 |
| 1338.5150 | 0.8945 |
| 1336.5863 | 0.8951 |
| 1334.6576 | 0.8957 |
| 1332.7289 | 0.8964 |
| 1330.8002 | 0.8972 |
| 1328.8715 | 0.8980 |
| 1326.9428 | 0.8989 |
| 1325.0141 | 0.8999 |
| 1323.0854 | 0.9008 |
| 1321.1567 | 0.9019 |
| 1319.2280 | 0.9030 |
| 1317.2993 | 0.9040 |
| 1315.3706 | 0.9048 |
| 1313.4419 | 0.9055 |
| 1311.5132 | 0.9061 |
| 1309.5845 | 0.9064 |
| 1307.6558 | 0.9068 |
| 1305.7271 | 0.9071 |
| 1303.7984 | 0.9075 |
| 1301.8697 | 0.9080 |
| 1299.9411 | 0.9086 |
| 1298.0124 | 0.9094 |
| 1296.0837 | 0.9101 |
| 1294.1550 | 0.9109 |
| 1292.2263 | 0.9116 |
| 1290.2976 | 0.9122 |
| 1288.3689 | 0.9128 |
| 1286.4402 | 0.9132 |



|           |        |
|-----------|--------|
| 1284.5115 | 0.9135 |
| 1282.5828 | 0.9137 |
| 1280.6541 | 0.9138 |
| 1278.7254 | 0.9139 |
| 1276.7967 | 0.9140 |
| 1274.8680 | 0.9140 |
| 1272.9393 | 0.9137 |
| 1271.0106 | 0.9131 |
| 1269.0819 | 0.9121 |
| 1267.1532 | 0.9109 |
| 1265.2245 | 0.9097 |
| 1263.2958 | 0.9087 |
| 1261.3671 | 0.9080 |
| 1259.4384 | 0.9078 |
| 1257.5097 | 0.9078 |
| 1255.5810 | 0.9079 |
| 1253.6524 | 0.9081 |
| 1251.7237 | 0.9083 |
| 1249.7950 | 0.9084 |
| 1247.8663 | 0.9087 |
| 1245.9376 | 0.9090 |
| 1244.0089 | 0.9093 |
| 1242.0802 | 0.9096 |
| 1240.1515 | 0.9101 |
| 1238.2228 | 0.9108 |
| 1236.2941 | 0.9118 |
| 1234.3654 | 0.9130 |
| 1232.4367 | 0.9147 |
| 1230.5080 | 0.9165 |
| 1228.5793 | 0.9185 |
| 1226.6506 | 0.9205 |
| 1224.7219 | 0.9222 |
| 1222.7932 | 0.9237 |
| 1220.8645 | 0.9248 |
| 1218.9358 | 0.9255 |
| 1217.0071 | 0.9256 |
| 1215.0784 | 0.9252 |
| 1213.1497 | 0.9243 |
| 1211.2210 | 0.9230 |
| 1209.2923 | 0.9216 |
| 1207.3636 | 0.9203 |
| 1205.4350 | 0.9195 |
| 1203.5063 | 0.9193 |
| 1201.5776 | 0.9195 |

|           |        |
|-----------|--------|
| 1199.6489 | 0.9202 |
| 1197.7202 | 0.9210 |
| 1195.7915 | 0.9216 |
| 1193.8628 | 0.9218 |
| 1191.9341 | 0.9213 |
| 1190.0054 | 0.9200 |
| 1188.0767 | 0.9175 |
| 1186.1480 | 0.9139 |
| 1184.2193 | 0.9091 |
| 1182.2906 | 0.9032 |
| 1180.3619 | 0.8962 |
| 1178.4332 | 0.8883 |
| 1176.5045 | 0.8795 |
| 1174.5758 | 0.8700 |
| 1172.6471 | 0.8596 |
| 1170.7184 | 0.8485 |
| 1168.7897 | 0.8369 |
| 1166.8610 | 0.8253 |
| 1164.9323 | 0.8142 |
| 1163.0036 | 0.8043 |
| 1161.0749 | 0.7959 |
| 1159.1463 | 0.7893 |
| 1157.2176 | 0.7845 |
| 1155.2889 | 0.7816 |
| 1153.3602 | 0.7806 |
| 1151.4315 | 0.7815 |
| 1149.5028 | 0.7839 |
| 1147.5741 | 0.7875 |
| 1145.6454 | 0.7917 |
| 1143.7167 | 0.7961 |
| 1141.7880 | 0.8002 |
| 1139.8593 | 0.8036 |
| 1137.9306 | 0.8059 |
| 1136.0019 | 0.8070 |
| 1134.0732 | 0.8068 |
| 1132.1445 | 0.8055 |
| 1130.2158 | 0.8035 |
| 1128.2871 | 0.8012 |
| 1126.3584 | 0.7988 |
| 1124.4297 | 0.7965 |
| 1122.5010 | 0.7941 |
| 1120.5723 | 0.7913 |
| 1118.6436 | 0.7879 |
| 1116.7149 | 0.7838 |

|           |        |
|-----------|--------|
| 1114.7862 | 0.7792 |
| 1112.8575 | 0.7746 |
| 1110.9289 | 0.7702 |
| 1109.0002 | 0.7662 |
| 1107.0715 | 0.7626 |
| 1105.1428 | 0.7596 |
| 1103.2141 | 0.7571 |
| 1101.2854 | 0.7548 |
| 1099.3567 | 0.7524 |
| 1097.4280 | 0.7492 |
| 1095.4993 | 0.7451 |
| 1093.5706 | 0.7398 |
| 1091.6419 | 0.7334 |
| 1089.7132 | 0.7261 |
| 1087.7845 | 0.7185 |
| 1085.8558 | 0.7115 |
| 1083.9271 | 0.7057 |
| 1081.9984 | 0.7018 |
| 1080.0697 | 0.7004 |
| 1078.1410 | 0.7017 |
| 1076.2123 | 0.7057 |
| 1074.2836 | 0.7116 |
| 1072.3549 | 0.7179 |
| 1070.4262 | 0.7230 |
| 1068.4975 | 0.7258 |
| 1066.5688 | 0.7258 |
| 1064.6402 | 0.7232 |
| 1062.7115 | 0.7190 |
| 1060.7828 | 0.7137 |
| 1058.8541 | 0.7082 |
| 1056.9254 | 0.7028 |
| 1054.9967 | 0.6978 |
| 1053.0680 | 0.6931 |
| 1051.1393 | 0.6889 |
| 1049.2106 | 0.6850 |
| 1047.2819 | 0.6817 |
| 1045.3532 | 0.6790 |
| 1043.4245 | 0.6768 |
| 1041.4958 | 0.6751 |
| 1039.5671 | 0.6736 |
| 1037.6384 | 0.6723 |
| 1035.7097 | 0.6710 |
| 1033.7810 | 0.6695 |
| 1031.8523 | 0.6679 |

|           |        |
|-----------|--------|
| 1029.9236 | 0.6661 |
| 1027.9949 | 0.6643 |
| 1026.0662 | 0.6630 |
| 1024.1375 | 0.6626 |
| 1022.2088 | 0.6635 |
| 1020.2801 | 0.6661 |
| 1018.3514 | 0.6704 |
| 1016.4228 | 0.6763 |
| 1014.4941 | 0.6833 |
| 1012.5654 | 0.6910 |
| 1010.6367 | 0.6988 |
| 1008.7080 | 0.7066 |
| 1006.7793 | 0.7141 |
| 1004.8506 | 0.7211 |
| 1002.9219 | 0.7275 |
| 1000.9932 | 0.7336 |
| 999.0645  | 0.7398 |
| 997.1358  | 0.7466 |
| 995.2071  | 0.7545 |
| 993.2784  | 0.7639 |
| 991.3497  | 0.7746 |
| 989.4210  | 0.7864 |
| 987.4923  | 0.7990 |
| 985.5636  | 0.8120 |
| 983.6349  | 0.8253 |
| 981.7062  | 0.8388 |
| 979.7775  | 0.8520 |
| 977.8488  | 0.8646 |
| 975.9201  | 0.8761 |
| 973.9914  | 0.8864 |
| 972.0627  | 0.8957 |
| 970.1341  | 0.9045 |
| 968.2054  | 0.9131 |
| 966.2767  | 0.9213 |
| 964.3480  | 0.9291 |
| 962.4193  | 0.9360 |
| 960.4906  | 0.9417 |
| 958.5619  | 0.9466 |
| 956.6332  | 0.9510 |
| 954.7045  | 0.9549 |
| 952.7758  | 0.9582 |
| 950.8471  | 0.9603 |
| 948.9184  | 0.9610 |
| 946.9897  | 0.9603 |

|          |        |
|----------|--------|
| 945.0610 | 0.9587 |
| 943.1323 | 0.9570 |
| 941.2036 | 0.9557 |
| 939.2749 | 0.9551 |
| 937.3462 | 0.9550 |
| 935.4175 | 0.9550 |
| 933.4888 | 0.9550 |
| 931.5601 | 0.9553 |
| 929.6314 | 0.9561 |
| 927.7027 | 0.9573 |
| 925.7740 | 0.9588 |
| 923.8453 | 0.9602 |
| 921.9167 | 0.9616 |
| 919.9880 | 0.9631 |
| 918.0593 | 0.9649 |
| 916.1306 | 0.9672 |
| 914.2019 | 0.9697 |
| 912.2732 | 0.9721 |
| 910.3445 | 0.9741 |
| 908.4158 | 0.9756 |
| 906.4871 | 0.9769 |
| 904.5584 | 0.9782 |
| 902.6297 | 0.9797 |
| 900.7010 | 0.9810 |
| 898.7723 | 0.9818 |
| 896.8436 | 0.9820 |
| 894.9149 | 0.9817 |
| 892.9862 | 0.9813 |
| 891.0575 | 0.9813 |
| 889.1288 | 0.9819 |
| 887.2001 | 0.9825 |
| 885.2714 | 0.9828 |
| 883.3427 | 0.9826 |
| 881.4140 | 0.9819 |
| 879.4853 | 0.9812 |
| 877.5566 | 0.9807 |
| 875.6280 | 0.9803 |
| 873.6993 | 0.9797 |
| 871.7706 | 0.9790 |
| 869.8419 | 0.9783 |
| 867.9132 | 0.9775 |
| 865.9845 | 0.9768 |
| 864.0558 | 0.9767 |
| 862.1271 | 0.9771 |

|          |        |
|----------|--------|
| 860.1984 | 0.9776 |
| 858.2697 | 0.9778 |
| 856.3410 | 0.9775 |
| 854.4123 | 0.9771 |
| 852.4836 | 0.9771 |
| 850.5549 | 0.9772 |
| 848.6262 | 0.9776 |
| 846.6975 | 0.9780 |
| 844.7688 | 0.9785 |
| 842.8401 | 0.9790 |
| 840.9114 | 0.9796 |
| 838.9827 | 0.9806 |
| 837.0540 | 0.9820 |
| 835.1253 | 0.9831 |
| 833.1966 | 0.9837 |
| 831.2679 | 0.9836 |
| 829.3392 | 0.9833 |
| 827.4106 | 0.9830 |
| 825.4819 | 0.9830 |
| 823.5532 | 0.9830 |
| 821.6245 | 0.9826 |
| 819.6958 | 0.9816 |
| 817.7671 | 0.9802 |
| 815.8384 | 0.9788 |
| 813.9097 | 0.9777 |
| 811.9810 | 0.9768 |
| 810.0523 | 0.9758 |
| 808.1236 | 0.9743 |
| 806.1949 | 0.9724 |
| 804.2662 | 0.9703 |
| 802.3375 | 0.9689 |
| 800.4088 | 0.9683 |
| 798.4801 | 0.9685 |
| 796.5514 | 0.9688 |
| 794.6227 | 0.9689 |
| 792.6940 | 0.9684 |
| 790.7653 | 0.9678 |
| 788.8366 | 0.9674 |
| 786.9079 | 0.9674 |
| 784.9792 | 0.9674 |
| 783.0505 | 0.9670 |
| 781.1219 | 0.9659 |
| 779.1932 | 0.9641 |
| 777.2645 | 0.9620 |

|          |        |
|----------|--------|
| 775.3358 | 0.9602 |
| 773.4071 | 0.9589 |
| 771.4784 | 0.9575 |
| 769.5497 | 0.9556 |
| 767.6210 | 0.9532 |
| 765.6923 | 0.9506 |
| 763.7636 | 0.9487 |
| 761.8349 | 0.9480 |
| 759.9062 | 0.9487 |
| 757.9775 | 0.9500 |
| 756.0488 | 0.9510 |
| 754.1201 | 0.9516 |
| 752.1914 | 0.9518 |
| 750.2627 | 0.9523 |
| 748.3340 | 0.9532 |
| 746.4053 | 0.9545 |
| 744.4766 | 0.9554 |
| 742.5479 | 0.9555 |
| 740.6192 | 0.9545 |
| 738.6905 | 0.9531 |
| 736.7618 | 0.9519 |
| 734.8331 | 0.9512 |
| 732.9045 | 0.9508 |
| 730.9758 | 0.9501 |
| 729.0471 | 0.9487 |
| 727.1184 | 0.9466 |
| 725.1897 | 0.9442 |
| 723.2610 | 0.9421 |
| 721.3323 | 0.9405 |
| 719.4036 | 0.9388 |
| 717.4749 | 0.9367 |
| 715.5462 | 0.9342 |
| 713.6175 | 0.9318 |
| 711.6888 | 0.9298 |
| 709.7601 | 0.9289 |
| 707.8314 | 0.9289 |
| 705.9027 | 0.9294 |
| 703.9740 | 0.9298 |
| 702.0453 | 0.9300 |
| 700.1166 | 0.9299 |
| 698.1879 | 0.9302 |
| 696.2592 | 0.9310 |
| 694.3305 | 0.9319 |
| 692.4018 | 0.9323 |

|          |        |
|----------|--------|
| 690.4731 | 0.9318 |
| 688.5444 | 0.9305 |
| 686.6158 | 0.9290 |
| 684.6871 | 0.9281 |
| 682.7584 | 0.9278 |
| 680.8297 | 0.9278 |
| 678.9010 | 0.9276 |
| 676.9723 | 0.9266 |
| 675.0436 | 0.9251 |
| 673.1149 | 0.9238 |
| 671.1862 | 0.9234 |
| 669.2575 | 0.9240 |
| 667.3288 | 0.9243 |
| 665.4001 | 0.9235 |
| 663.4714 | 0.9225 |
| 661.5427 | 0.9217 |
| 659.6140 | 0.9211 |
| 657.6853 | 0.9213 |
| 655.7566 | 0.9219 |
| 653.8279 | 0.9223 |
| 651.8992 | 0.9221 |
| 649.9705 | 0.9214 |
| 648.0418 | 0.9205 |
| 646.1131 | 0.9199 |
| 644.1844 | 0.9198 |
| 642.2557 | 0.9198 |
| 640.3270 | 0.9197 |
| 638.3984 | 0.9190 |
| 636.4697 | 0.9177 |
| 634.5410 | 0.9165 |
| 632.6123 | 0.9156 |
| 630.6836 | 0.9152 |
| 628.7549 | 0.9147 |
| 626.8262 | 0.9135 |
| 624.8975 | 0.9116 |
| 622.9688 | 0.9094 |
| 621.0401 | 0.9076 |
| 619.1114 | 0.9065 |
| 617.1827 | 0.9058 |
| 615.2540 | 0.9050 |
| 613.3253 | 0.9037 |
| 611.3966 | 0.9026 |
| 609.4679 | 0.9019 |
| 607.5392 | 0.9018 |



|          |        |
|----------|--------|
| 605.6105 | 0.9025 |
| 603.6818 | 0.9034 |
| 601.7531 | 0.9037 |
| 599.8244 | 0.9030 |
| 597.8957 | 0.9021 |
| 595.9670 | 0.9016 |
| 594.0383 | 0.9017 |
| 592.1097 | 0.9019 |
| 590.1810 | 0.9013 |
| 588.2523 | 0.8996 |
| 586.3236 | 0.8969 |
| 584.3949 | 0.8938 |
| 582.4662 | 0.8911 |
| 580.5375 | 0.8889 |
| 578.6088 | 0.8876 |
| 576.6801 | 0.8872 |
| 574.7514 | 0.8874 |
| 572.8227 | 0.8880 |
| 570.8940 | 0.8889 |
| 568.9653 | 0.8899 |
| 567.0366 | 0.8916 |
| 565.1079 | 0.8940 |
| 563.1792 | 0.8958 |
| 561.2505 | 0.8968 |
| 559.3218 | 0.8973 |
| 557.3931 | 0.8977 |
| 555.4644 | 0.8983 |
| 553.5357 | 0.8992 |
| 551.6070 | 0.8998 |
| 549.6783 | 0.8998 |
| 547.7496 | 0.8992 |
| 545.8209 | 0.8980 |
| 543.8923 | 0.8970 |
| 541.9636 | 0.8964 |
| 540.0349 | 0.8957 |
| 538.1062 | 0.8946 |
| 536.1775 | 0.8933 |
| 534.2488 | 0.8922 |
| 532.3201 | 0.8918 |
| 530.3914 | 0.8924 |
| 528.4627 | 0.8938 |
| 526.5340 | 0.8958 |
| 524.6053 | 0.8979 |
| 522.6766 | 0.8996 |

|          |        |
|----------|--------|
| 520.7479 | 0.9013 |
| 518.8192 | 0.9041 |
| 516.8905 | 0.9076 |
| 514.9618 | 0.9106 |
| 513.0331 | 0.9134 |
| 511.1044 | 0.9162 |
| 509.1757 | 0.9184 |
| 507.2470 | 0.9201 |
| 505.3183 | 0.9226 |
| 503.3896 | 0.9261 |
| 501.4609 | 0.9295 |
| 499.5322 | 0.9317 |
| 497.6036 | 0.9326 |
| 495.6749 | 0.9335 |
| 493.7462 | 0.9352 |
| 491.8175 | 0.9376 |
| 489.8888 | 0.9400 |
| 487.9601 | 0.9423 |
| 486.0314 | 0.9440 |
| 484.1027 | 0.9452 |
| 482.1740 | 0.9461 |
| 480.2453 | 0.9473 |
| 478.3166 | 0.9493 |
| 476.3879 | 0.9518 |
| 474.4592 | 0.9542 |
| 472.5305 | 0.9559 |
| 470.6018 | 0.9565 |
| 468.6731 | 0.9570 |
| 466.7444 | 0.9584 |
| 464.8157 | 0.9608 |
| 462.8870 | 0.9631 |
| 460.9583 | 0.9647 |
| 459.0296 | 0.9654 |
| 457.1009 | 0.9656 |
| 455.1722 | 0.9660 |
| 453.2435 | 0.9669 |
| 451.3148 | 0.9680 |
| 449.3862 | 0.9687 |
| 447.4575 | 0.9693 |
| 445.5288 | 0.9696 |
| 443.6001 | 0.9696 |
| 441.6714 | 0.9697 |
| 439.7427 | 0.9702 |
| 437.8140 | 0.9709 |

|          |        |
|----------|--------|
| 435.8853 | 0.9715 |
| 433.9566 | 0.9720 |
| 432.0279 | 0.9729 |
| 430.0992 | 0.9746 |
| 428.1705 | 0.9765 |
| 426.2418 | 0.9785 |
| 424.3131 | 0.9802 |
| 422.3844 | 0.9806 |
| 420.4557 | 0.9810 |
| 418.5270 | 0.9840 |
| 416.5983 | 0.9871 |
| 414.6696 | 0.9880 |
| 412.7409 | 0.9877 |
| 410.8122 | 0.9864 |
| 408.8835 | 0.9842 |
| 406.9548 | 0.9836 |
| 405.0261 | 0.9863 |
| 403.0975 | 0.9902 |
| 401.1688 | 0.9945 |
| 399.2401 | 1.0000 |

## XRD

| <b>2θ</b> | <b>Intensity</b> |
|-----------|------------------|
| 5.0000    | 1062.0000        |
| 5.0190    | 1062.0000        |
| 5.0390    | 1062.0000        |
| 5.0580    | 1059.0000        |
| 5.0780    | 1055.0000        |
| 5.0970    | 1049.0000        |
| 5.1170    | 1045.0000        |
| 5.1360    | 1043.0000        |
| 5.1560    | 1044.0000        |
| 5.1750    | 1047.0000        |
| 5.1940    | 1050.0000        |
| 5.2140    | 1050.0000        |
| 5.2330    | 1047.0000        |
| 5.2530    | 1041.0000        |
| 5.2720    | 1033.0000        |
| 5.2920    | 1025.0000        |
| 5.3110    | 1020.0000        |
| 5.3310    | 1017.0000        |
| 5.3500    | 1016.0000        |
| 5.3690    | 1018.0000        |
| 5.3890    | 1020.0000        |
| 5.4080    | 1021.0000        |
| 5.4280    | 1022.0000        |
| 5.4470    | 1021.0000        |
| 5.4670    | 1019.0000        |
| 5.4860    | 1016.0000        |
| 5.5060    | 1012.0000        |
| 5.5250    | 1008.0000        |
| 5.5440    | 1005.0000        |
| 5.5640    | 1003.0000        |
| 5.5830    | 1004.0000        |
| 5.6030    | 1006.0000        |
| 5.6220    | 1010.0000        |
| 5.6420    | 1015.0000        |
| 5.6610    | 1019.0000        |
| 5.6810    | 1022.0000        |
| 5.7000    | 1023.0000        |
| 5.7190    | 1021.0000        |
| 5.7390    | 1017.0000        |
| 5.7580    | 1011.0000        |
| 5.7780    | 1005.0000        |
| 5.7970    | 998.0000         |

|        |          |
|--------|----------|
| 5.8170 | 991.0000 |
| 5.8360 | 985.0000 |
| 5.8560 | 978.0000 |
| 5.8750 | 972.0000 |
| 5.8940 | 966.0000 |
| 5.9140 | 961.0000 |
| 5.9330 | 958.0000 |
| 5.9530 | 957.0000 |
| 5.9720 | 959.0000 |
| 5.9920 | 961.0000 |
| 6.0110 | 965.0000 |
| 6.0310 | 967.0000 |
| 6.0500 | 968.0000 |
| 6.0690 | 968.0000 |
| 6.0890 | 965.0000 |
| 6.1080 | 961.0000 |
| 6.1280 | 957.0000 |
| 6.1470 | 953.0000 |
| 6.1670 | 950.0000 |
| 6.1860 | 949.0000 |
| 6.2060 | 949.0000 |
| 6.2250 | 950.0000 |
| 6.2440 | 951.0000 |
| 6.2640 | 952.0000 |
| 6.2830 | 951.0000 |
| 6.3030 | 950.0000 |
| 6.3220 | 949.0000 |
| 6.3420 | 948.0000 |
| 6.3610 | 947.0000 |
| 6.3810 | 949.0000 |
| 6.4000 | 951.0000 |
| 6.4190 | 954.0000 |
| 6.4390 | 957.0000 |
| 6.4580 | 959.0000 |
| 6.4780 | 959.0000 |
| 6.4970 | 956.0000 |
| 6.5170 | 953.0000 |
| 6.5360 | 948.0000 |
| 6.5560 | 944.0000 |
| 6.5750 | 941.0000 |
| 6.5940 | 938.0000 |
| 6.6140 | 936.0000 |
| 6.6330 | 934.0000 |
| 6.6530 | 932.0000 |

|        |          |
|--------|----------|
| 6.6720 | 930.0000 |
| 6.6920 | 930.0000 |
| 6.7110 | 930.0000 |
| 6.7310 | 932.0000 |
| 6.7500 | 934.0000 |
| 6.7690 | 936.0000 |
| 6.7890 | 935.0000 |
| 6.8080 | 933.0000 |
| 6.8280 | 927.0000 |
| 6.8470 | 920.0000 |
| 6.8670 | 912.0000 |
| 6.8860 | 904.0000 |
| 6.9060 | 897.0000 |
| 6.9250 | 891.0000 |
| 6.9440 | 886.0000 |
| 6.9640 | 882.0000 |
| 6.9830 | 876.0000 |
| 7.0030 | 871.0000 |
| 7.0220 | 867.0000 |
| 7.0420 | 864.0000 |
| 7.0610 | 864.0000 |
| 7.0810 | 866.0000 |
| 7.1000 | 871.0000 |
| 7.1190 | 878.0000 |
| 7.1390 | 884.0000 |
| 7.1580 | 889.0000 |
| 7.1780 | 892.0000 |
| 7.1970 | 893.0000 |
| 7.2170 | 893.0000 |
| 7.2360 | 892.0000 |
| 7.2560 | 890.0000 |
| 7.2750 | 889.0000 |
| 7.2940 | 890.0000 |
| 7.3140 | 891.0000 |
| 7.3330 | 894.0000 |
| 7.3530 | 896.0000 |
| 7.3720 | 896.0000 |
| 7.3920 | 894.0000 |
| 7.4110 | 888.0000 |
| 7.4310 | 880.0000 |
| 7.4500 | 871.0000 |
| 7.4690 | 863.0000 |
| 7.4890 | 856.0000 |
| 7.5080 | 852.0000 |

|        |          |
|--------|----------|
| 7.5280 | 852.0000 |
| 7.5470 | 854.0000 |
| 7.5670 | 859.0000 |
| 7.5860 | 863.0000 |
| 7.6060 | 868.0000 |
| 7.6250 | 870.0000 |
| 7.6440 | 870.0000 |
| 7.6640 | 867.0000 |
| 7.6830 | 863.0000 |
| 7.7030 | 858.0000 |
| 7.7220 | 854.0000 |
| 7.7420 | 849.0000 |
| 7.7610 | 845.0000 |
| 7.7810 | 840.0000 |
| 7.8000 | 836.0000 |
| 7.8190 | 832.0000 |
| 7.8390 | 830.0000 |
| 7.8580 | 829.0000 |
| 7.8780 | 829.0000 |
| 7.8970 | 831.0000 |
| 7.9170 | 832.0000 |
| 7.9360 | 832.0000 |
| 7.9560 | 830.0000 |
| 7.9750 | 828.0000 |
| 7.9940 | 825.0000 |
| 8.0140 | 824.0000 |
| 8.0330 | 824.0000 |
| 8.0530 | 826.0000 |
| 8.0720 | 829.0000 |
| 8.0920 | 831.0000 |
| 8.1110 | 834.0000 |
| 8.1310 | 835.0000 |
| 8.1500 | 836.0000 |
| 8.1690 | 837.0000 |
| 8.1890 | 838.0000 |
| 8.2080 | 839.0000 |
| 8.2280 | 840.0000 |
| 8.2470 | 840.0000 |
| 8.2670 | 838.0000 |
| 8.2860 | 834.0000 |
| 8.3060 | 828.0000 |
| 8.3250 | 821.0000 |
| 8.3440 | 813.0000 |
| 8.3640 | 805.0000 |

|        |          |
|--------|----------|
| 8.3830 | 800.0000 |
| 8.4030 | 797.0000 |
| 8.4220 | 795.0000 |
| 8.4420 | 795.0000 |
| 8.4610 | 796.0000 |
| 8.4810 | 796.0000 |
| 8.5000 | 796.0000 |
| 8.5190 | 795.0000 |
| 8.5390 | 793.0000 |
| 8.5580 | 792.0000 |
| 8.5780 | 791.0000 |
| 8.5970 | 791.0000 |
| 8.6170 | 792.0000 |
| 8.6360 | 793.0000 |
| 8.6560 | 794.0000 |
| 8.6750 | 796.0000 |
| 8.6940 | 798.0000 |
| 8.7140 | 799.0000 |
| 8.7330 | 799.0000 |
| 8.7530 | 796.0000 |
| 8.7720 | 791.0000 |
| 8.7920 | 784.0000 |
| 8.8110 | 777.0000 |
| 8.8310 | 769.0000 |
| 8.8500 | 763.0000 |
| 8.8690 | 758.0000 |
| 8.8890 | 755.0000 |
| 8.9080 | 753.0000 |
| 8.9280 | 751.0000 |
| 8.9470 | 749.0000 |
| 8.9670 | 749.0000 |
| 8.9860 | 750.0000 |
| 9.0060 | 754.0000 |
| 9.0250 | 760.0000 |
| 9.0440 | 769.0000 |
| 9.0640 | 778.0000 |
| 9.0830 | 783.0000 |
| 9.1030 | 785.0000 |
| 9.1220 | 781.0000 |
| 9.1420 | 773.0000 |
| 9.1610 | 762.0000 |
| 9.1810 | 751.0000 |
| 9.2000 | 742.0000 |
| 9.2190 | 737.0000 |



|         |          |
|---------|----------|
| 9.2390  | 736.0000 |
| 9.2580  | 738.0000 |
| 9.2780  | 742.0000 |
| 9.2970  | 747.0000 |
| 9.3170  | 752.0000 |
| 9.3360  | 755.0000 |
| 9.3560  | 756.0000 |
| 9.3750  | 755.0000 |
| 9.3940  | 751.0000 |
| 9.4140  | 747.0000 |
| 9.4330  | 743.0000 |
| 9.4530  | 741.0000 |
| 9.4720  | 740.0000 |
| 9.4920  | 741.0000 |
| 9.5110  | 743.0000 |
| 9.5310  | 746.0000 |
| 9.5500  | 748.0000 |
| 9.5690  | 749.0000 |
| 9.5890  | 748.0000 |
| 9.6080  | 745.0000 |
| 9.6280  | 740.0000 |
| 9.6470  | 735.0000 |
| 9.6670  | 729.0000 |
| 9.6860  | 726.0000 |
| 9.7060  | 725.0000 |
| 9.7250  | 726.0000 |
| 9.7440  | 729.0000 |
| 9.7640  | 732.0000 |
| 9.7830  | 734.0000 |
| 9.8030  | 733.0000 |
| 9.8220  | 730.0000 |
| 9.8420  | 725.0000 |
| 9.8610  | 719.0000 |
| 9.8810  | 715.0000 |
| 9.9000  | 712.0000 |
| 9.9190  | 712.0000 |
| 9.9390  | 714.0000 |
| 9.9580  | 718.0000 |
| 9.9780  | 722.0000 |
| 9.9970  | 726.0000 |
| 10.0170 | 728.0000 |
| 10.0360 | 728.0000 |
| 10.0560 | 726.0000 |
| 10.0750 | 721.0000 |

10.0940 715.0000  
10.1140 707.0000  
10.1330 701.0000  
10.1530 696.0000  
10.1720 694.0000  
10.1920 696.0000  
10.2110 699.0000  
10.2310 704.0000  
10.2500 707.0000  
10.2690 708.0000  
10.2890 706.0000  
10.3080 703.0000  
10.3280 697.0000  
10.3470 692.0000  
10.3670 687.0000  
10.3860 683.0000  
10.4060 682.0000  
10.4250 683.0000  
10.4440 685.0000  
10.4640 689.0000  
10.4830 692.0000  
10.5030 696.0000  
10.5220 698.0000  
10.5420 699.0000  
10.5610 697.0000  
10.5810 695.0000  
10.6000 692.0000  
10.6190 690.0000  
10.6390 687.0000  
10.6580 685.0000  
10.6780 682.0000  
10.6970 680.0000  
10.7170 677.0000  
10.7360 675.0000  
10.7560 675.0000  
10.7750 676.0000  
10.7940 678.0000  
10.8140 683.0000  
10.8330 686.0000  
10.8530 689.0000  
10.8720 690.0000  
10.8920 688.0000  
10.9110 683.0000  
10.9310 678.0000

10.9500 672.0000  
10.9690 668.0000  
10.9890 664.0000  
11.0080 663.0000  
11.0280 662.0000  
11.0470 663.0000  
11.0670 663.0000  
11.0860 663.0000  
11.1060 663.0000  
11.1250 662.0000  
11.1440 662.0000  
11.1640 661.0000  
11.1830 661.0000  
11.2030 660.0000  
11.2220 659.0000  
11.2420 659.0000  
11.2610 658.0000  
11.2810 657.0000  
11.3000 656.0000  
11.3190 655.0000  
11.3390 654.0000  
11.3580 653.0000  
11.3780 651.0000  
11.3970 649.0000  
11.4170 647.0000  
11.4360 645.0000  
11.4560 644.0000  
11.4750 644.0000  
11.4940 646.0000  
11.5140 650.0000  
11.5330 655.0000  
11.5530 661.0000  
11.5720 666.0000  
11.5920 671.0000  
11.6110 674.0000  
11.6310 675.0000  
11.6500 674.0000  
11.6690 671.0000  
11.6890 668.0000  
11.7080 664.0000  
11.7280 660.0000  
11.7470 656.0000  
11.7670 652.0000  
11.7860 648.0000

11.8060 644.0000  
11.8250 640.0000  
11.8440 638.0000  
11.8640 637.0000  
11.8830 637.0000  
11.9030 639.0000  
11.9220 643.0000  
11.9420 647.0000  
11.9610 651.0000  
11.9810 656.0000  
12.0000 658.0000  
12.0190 659.0000  
12.0390 657.0000  
12.0580 653.0000  
12.0780 646.0000  
12.0970 639.0000  
12.1170 632.0000  
12.1360 627.0000  
12.1560 624.0000  
12.1750 623.0000  
12.1940 624.0000  
12.2140 626.0000  
12.2330 629.0000  
12.2530 630.0000  
12.2720 631.0000  
12.2920 631.0000  
12.3110 630.0000  
12.3310 630.0000  
12.3500 631.0000  
12.3690 632.0000  
12.3890 635.0000  
12.4080 636.0000  
12.4280 637.0000  
12.4470 636.0000  
12.4670 635.0000  
12.4860 633.0000  
12.5060 633.0000  
12.5250 634.0000  
12.5440 636.0000  
12.5640 639.0000  
12.5830 640.0000  
12.6030 640.0000  
12.6220 638.0000  
12.6420 633.0000

12.6610 628.0000  
12.6810 624.0000  
12.7000 622.0000  
12.7190 623.0000  
12.7390 626.0000  
12.7580 631.0000  
12.7780 637.0000  
12.7970 644.0000  
12.8170 649.0000  
12.8360 652.0000  
12.8560 653.0000  
12.8750 652.0000  
12.8940 649.0000  
12.9140 645.0000  
12.9330 641.0000  
12.9530 638.0000  
12.9720 635.0000  
12.9920 633.0000  
13.0110 632.0000  
13.0310 631.0000  
13.0500 631.0000  
13.0690 631.0000  
13.0890 632.0000  
13.1080 634.0000  
13.1280 635.0000  
13.1470 636.0000  
13.1670 637.0000  
13.1860 638.0000  
13.2060 640.0000  
13.2250 643.0000  
13.2440 646.0000  
13.2640 648.0000  
13.2830 650.0000  
13.3030 652.0000  
13.3220 654.0000  
13.3420 655.0000  
13.3610 657.0000  
13.3810 659.0000  
13.4000 659.0000  
13.4190 659.0000  
13.4390 656.0000  
13.4580 652.0000  
13.4780 646.0000  
13.4970 641.0000

13.5170 636.0000  
13.5360 632.0000  
13.5560 631.0000  
13.5750 632.0000  
13.5940 634.0000  
13.6140 638.0000  
13.6330 642.0000  
13.6530 644.0000  
13.6720 645.0000  
13.6920 644.0000  
13.7110 641.0000  
13.7310 638.0000  
13.7500 635.0000  
13.7690 634.0000  
13.7890 634.0000  
13.8080 635.0000  
13.8280 635.0000  
13.8470 635.0000  
13.8670 635.0000  
13.8860 635.0000  
13.9060 637.0000  
13.9250 642.0000  
13.9440 648.0000  
13.9640 655.0000  
13.9830 661.0000  
14.0030 665.0000  
14.0220 665.0000  
14.0420 663.0000  
14.0610 658.0000  
14.0810 652.0000  
14.1000 648.0000  
14.1190 646.0000  
14.1390 646.0000  
14.1580 647.0000  
14.1780 650.0000  
14.1970 653.0000  
14.2170 655.0000  
14.2360 656.0000  
14.2560 657.0000  
14.2750 657.0000  
14.2940 657.0000  
14.3140 657.0000  
14.3330 656.0000  
14.3530 654.0000

14.3720 652.0000  
14.3920 650.0000  
14.4110 648.0000  
14.4310 649.0000  
14.4500 652.0000  
14.4690 656.0000  
14.4890 663.0000  
14.5080 669.0000  
14.5280 674.0000  
14.5470 678.0000  
14.5670 680.0000  
14.5860 681.0000  
14.6060 680.0000  
14.6250 679.0000  
14.6440 679.0000  
14.6640 678.0000  
14.6830 678.0000  
14.7030 678.0000  
14.7220 677.0000  
14.7420 676.0000  
14.7610 674.0000  
14.7810 671.0000  
14.8000 669.0000  
14.8190 667.0000  
14.8390 665.0000  
14.8580 664.0000  
14.8780 665.0000  
14.8970 666.0000  
14.9170 668.0000  
14.9360 671.0000  
14.9560 674.0000  
14.9750 677.0000  
14.9940 678.0000  
15.0140 678.0000  
15.0330 677.0000  
15.0530 675.0000  
15.0720 673.0000  
15.0920 671.0000  
15.1110 669.0000  
15.1310 667.0000  
15.1500 664.0000  
15.1690 662.0000  
15.1890 660.0000  
15.2080 661.0000

15.2280 664.0000  
15.2470 670.0000  
15.2670 678.0000  
15.2860 687.0000  
15.3060 694.0000  
15.3250 700.0000  
15.3440 703.0000  
15.3640 704.0000  
15.3830 703.0000  
15.4030 699.0000  
15.4220 694.0000  
15.4420 689.0000  
15.4610 684.0000  
15.4810 682.0000  
15.5000 681.0000  
15.5190 684.0000  
15.5390 689.0000  
15.5580 694.0000  
15.5780 700.0000  
15.5970 704.0000  
15.6170 707.0000  
15.6360 708.0000  
15.6560 708.0000  
15.6750 709.0000  
15.6940 711.0000  
15.7140 713.0000  
15.7330 716.0000  
15.7530 719.0000  
15.7720 721.0000  
15.7920 722.0000  
15.8110 722.0000  
15.8310 721.0000  
15.8500 721.0000  
15.8690 721.0000  
15.8890 722.0000  
15.9080 723.0000  
15.9280 724.0000  
15.9470 725.0000  
15.9670 726.0000  
15.9860 726.0000  
16.0060 725.0000  
16.0250 725.0000  
16.0440 725.0000  
16.0640 725.0000



16.0830 726.0000  
16.1030 727.0000  
16.1220 728.0000  
16.1420 729.0000  
16.1610 731.0000  
16.1810 734.0000  
16.2000 737.0000  
16.2190 741.0000  
16.2390 743.0000  
16.2580 745.0000  
16.2780 744.0000  
16.2970 742.0000  
16.3170 739.0000  
16.3360 737.0000  
16.3560 736.0000  
16.3750 736.0000  
16.3940 738.0000  
16.4140 741.0000  
16.4330 744.0000  
16.4530 746.0000  
16.4720 746.0000  
16.4920 745.0000  
16.5110 743.0000  
16.5310 742.0000  
16.5500 741.0000  
16.5690 742.0000  
16.5890 743.0000  
16.6080 746.0000  
16.6280 749.0000  
16.6470 753.0000  
16.6670 756.0000  
16.6860 759.0000  
16.7060 762.0000  
16.7250 767.0000  
16.7440 771.0000  
16.7640 776.0000  
16.7830 780.0000  
16.8030 783.0000  
16.8220 784.0000  
16.8420 785.0000  
16.8610 785.0000  
16.8810 785.0000  
16.9000 788.0000  
16.9190 793.0000

16.9390 798.0000  
16.9580 804.0000  
16.9780 809.0000  
16.9970 812.0000  
17.0170 812.0000  
17.0360 809.0000  
17.0560 805.0000  
17.0750 798.0000  
17.0940 792.0000  
17.1140 788.0000  
17.1330 785.0000  
17.1530 784.0000  
17.1720 786.0000  
17.1920 789.0000  
17.2110 792.0000  
17.2310 796.0000  
17.2500 798.0000  
17.2690 800.0000  
17.2890 801.0000  
17.3080 801.0000  
17.3280 801.0000  
17.3470 801.0000  
17.3670 801.0000  
17.3860 800.0000  
17.4060 799.0000  
17.4250 797.0000  
17.4440 796.0000  
17.4640 795.0000  
17.4830 797.0000  
17.5030 800.0000  
17.5220 806.0000  
17.5420 812.0000  
17.5610 818.0000  
17.5810 822.0000  
17.6000 824.0000  
17.6190 823.0000  
17.6390 819.0000  
17.6580 814.0000  
17.6780 810.0000  
17.6970 807.0000  
17.7170 808.0000  
17.7360 812.0000  
17.7560 820.0000  
17.7750 830.0000

17.7940 840.0000  
17.8140 846.0000  
17.8330 848.0000  
17.8530 846.0000  
17.8720 839.0000  
17.8920 829.0000  
17.9110 820.0000  
17.9310 813.0000  
17.9500 811.0000  
17.9690 814.0000  
17.9890 821.0000  
18.0080 829.0000  
18.0280 838.0000  
18.0470 844.0000  
18.0670 848.0000  
18.0860 849.0000  
18.1060 849.0000  
18.1250 849.0000  
18.1440 849.0000  
18.1640 849.0000  
18.1830 850.0000  
18.2030 851.0000  
18.2220 852.0000  
18.2420 852.0000  
18.2610 853.0000  
18.2810 855.0000  
18.3000 860.0000  
18.3190 866.0000  
18.3390 873.0000  
18.3580 881.0000  
18.3780 887.0000  
18.3970 891.0000  
18.4170 891.0000  
18.4360 889.0000  
18.4560 885.0000  
18.4750 880.0000  
18.4940 876.0000  
18.5140 875.0000  
18.5330 876.0000  
18.5530 879.0000  
18.5720 884.0000  
18.5920 889.0000  
18.6110 895.0000  
18.6310 900.0000

18.6500 904.0000  
18.6690 908.0000  
18.6890 910.0000  
18.7080 911.0000  
18.7280 909.0000  
18.7470 906.0000  
18.7670 904.0000  
18.7860 902.0000  
18.8060 903.0000  
18.8250 906.0000  
18.8440 910.0000  
18.8640 915.0000  
18.8830 918.0000  
18.9030 920.0000  
18.9220 919.0000  
18.9420 916.0000  
18.9610 911.0000  
18.9810 906.0000  
19.0000 901.0000  
19.0190 898.0000  
19.0390 897.0000  
19.0580 898.0000  
19.0780 901.0000  
19.0970 907.0000  
19.1170 912.0000  
19.1360 917.0000  
19.1560 921.0000  
19.1750 922.0000  
19.1940 923.0000  
19.2140 923.0000  
19.2330 925.0000  
19.2530 929.0000  
19.2720 935.0000  
19.2920 942.0000  
19.3110 951.0000  
19.3310 959.0000  
19.3500 965.0000  
19.3690 969.0000  
19.3890 970.0000  
19.4080 968.0000  
19.4280 965.0000  
19.4470 960.0000  
19.4670 955.0000  
19.4860 951.0000

19.5060 950.0000  
19.5250 951.0000  
19.5440 954.0000  
19.5640 958.0000  
19.5830 962.0000  
19.6030 966.0000  
19.6220 968.0000  
19.6420 967.0000  
19.6610 964.0000  
19.6810 959.0000  
19.7000 953.0000  
19.7190 947.0000  
19.7390 943.0000  
19.7580 941.0000  
19.7780 941.0000  
19.7970 944.0000  
19.8170 948.0000  
19.8360 952.0000  
19.8560 955.0000  
19.8750 958.0000  
19.8940 959.0000  
19.9140 959.0000  
19.9330 959.0000  
19.9530 958.0000  
19.9720 958.0000  
19.9920 958.0000  
20.0110 960.0000  
20.0310 963.0000  
20.0500 966.0000  
20.0690 970.0000  
20.0890 972.0000  
20.1080 973.0000  
20.1280 973.0000  
20.1470 971.0000  
20.1670 968.0000  
20.1860 965.0000  
20.2060 964.0000  
20.2250 964.0000  
20.2440 965.0000  
20.2640 967.0000  
20.2830 969.0000  
20.3030 970.0000  
20.3220 971.0000  
20.3420 971.0000

20.3610 971.0000  
20.3810 971.0000  
20.4000 970.0000  
20.4190 970.0000  
20.4390 970.0000  
20.4580 969.0000  
20.4780 967.0000  
20.4970 964.0000  
20.5170 961.0000  
20.5360 959.0000  
20.5560 958.0000  
20.5750 959.0000  
20.5940 962.0000  
20.6140 965.0000  
20.6330 969.0000  
20.6530 972.0000  
20.6720 972.0000  
20.6920 970.0000  
20.7110 967.0000  
20.7310 963.0000  
20.7500 960.0000  
20.7690 959.0000  
20.7890 962.0000  
20.8080 967.0000  
20.8280 973.0000  
20.8470 979.0000  
20.8670 984.0000  
20.8860 987.0000  
20.9060 986.0000  
20.9250 983.0000  
20.9440 979.0000  
20.9640 974.0000  
20.9830 968.0000  
21.0030 964.0000  
21.0220 961.0000  
21.0420 958.0000  
21.0610 956.0000  
21.0810 954.0000  
21.1000 951.0000  
21.1190 947.0000  
21.1390 945.0000  
21.1580 943.0000  
21.1780 943.0000  
21.1970 943.0000

21.2170 945.0000  
21.2360 945.0000  
21.2560 944.0000  
21.2750 941.0000  
21.2940 938.0000  
21.3140 935.0000  
21.3330 934.0000  
21.3530 936.0000  
21.3720 939.0000  
21.3920 943.0000  
21.4110 947.0000  
21.4310 949.0000  
21.4500 950.0000  
21.4690 949.0000  
21.4890 947.0000  
21.5080 946.0000  
21.5280 946.0000  
21.5470 946.0000  
21.5670 947.0000  
21.5860 948.0000  
21.6060 947.0000  
21.6250 945.0000  
21.6440 942.0000  
21.6640 938.0000  
21.6830 935.0000  
21.7030 934.0000  
21.7220 933.0000  
21.7420 933.0000  
21.7610 934.0000  
21.7810 933.0000  
21.8000 932.0000  
21.8190 931.0000  
21.8390 929.0000  
21.8580 929.0000  
21.8780 930.0000  
21.8970 933.0000  
21.9170 936.0000  
21.9360 939.0000  
21.9560 940.0000  
21.9750 938.0000  
21.9940 932.0000  
22.0140 924.0000  
22.0330 914.0000  
22.0530 907.0000

22.0720 903.0000  
22.0920 902.0000  
22.1110 905.0000  
22.1310 911.0000  
22.1500 918.0000  
22.1690 925.0000  
22.1890 931.0000  
22.2080 936.0000  
22.2280 940.0000  
22.2470 940.0000  
22.2670 939.0000  
22.2860 935.0000  
22.3060 928.0000  
22.3250 921.0000  
22.3440 914.0000  
22.3640 907.0000  
22.3830 903.0000  
22.4030 902.0000  
22.4220 902.0000  
22.4420 905.0000  
22.4610 908.0000  
22.4810 911.0000  
22.5000 913.0000  
22.5190 913.0000  
22.5390 912.0000  
22.5580 909.0000  
22.5780 905.0000  
22.5970 899.0000  
22.6170 892.0000  
22.6360 884.0000  
22.6560 876.0000  
22.6750 867.0000  
22.6940 859.0000  
22.7140 853.0000  
22.7330 850.0000  
22.7530 851.0000  
22.7720 854.0000  
22.7920 860.0000  
22.8110 867.0000  
22.8310 872.0000  
22.8500 876.0000  
22.8690 878.0000  
22.8890 877.0000  
22.9080 875.0000



22.9280 873.0000  
22.9470 870.0000  
22.9670 868.0000  
22.9860 866.0000  
23.0060 863.0000  
23.0250 859.0000  
23.0440 855.0000  
23.0640 849.0000  
23.0830 843.0000  
23.1030 838.0000  
23.1220 834.0000  
23.1420 831.0000  
23.1610 830.0000  
23.1810 831.0000  
23.2000 833.0000  
23.2190 834.0000  
23.2390 835.0000  
23.2580 836.0000  
23.2780 837.0000  
23.2970 838.0000  
23.3170 840.0000  
23.3360 842.0000  
23.3560 844.0000  
23.3750 843.0000  
23.3940 841.0000  
23.4140 837.0000  
23.4330 833.0000  
23.4530 828.0000  
23.4720 825.0000  
23.4920 822.0000  
23.5110 820.0000  
23.5310 819.0000  
23.5500 817.0000  
23.5690 815.0000  
23.5890 813.0000  
23.6080 810.0000  
23.6280 808.0000  
23.6470 805.0000  
23.6670 803.0000  
23.6860 802.0000  
23.7060 800.0000  
23.7250 799.0000  
23.7440 798.0000  
23.7640 795.0000

23.7830 790.0000  
23.8030 784.0000  
23.8220 777.0000  
23.8420 771.0000  
23.8610 767.0000  
23.8810 766.0000  
23.9000 768.0000  
23.9190 773.0000  
23.9390 780.0000  
23.9580 787.0000  
23.9780 793.0000  
23.9970 796.0000  
24.0170 797.0000  
24.0360 794.0000  
24.0560 788.0000  
24.0750 781.0000  
24.0940 773.0000  
24.1140 766.0000  
24.1330 761.0000  
24.1530 757.0000  
24.1720 755.0000  
24.1920 756.0000  
24.2110 757.0000  
24.2310 758.0000  
24.2500 759.0000  
24.2690 759.0000  
24.2890 757.0000  
24.3080 755.0000  
24.3280 753.0000  
24.3470 752.0000  
24.3670 752.0000  
24.3860 753.0000  
24.4060 754.0000  
24.4250 755.0000  
24.4440 754.0000  
24.4640 752.0000  
24.4830 749.0000  
24.5030 744.0000  
24.5220 738.0000  
24.5420 731.0000  
24.5610 725.0000  
24.5810 720.0000  
24.6000 717.0000  
24.6190 715.0000

24.6390 716.0000  
24.6580 718.0000  
24.6780 721.0000  
24.6970 724.0000  
24.7170 725.0000  
24.7360 725.0000  
24.7560 722.0000  
24.7750 718.0000  
24.7950 712.0000  
24.8140 706.0000  
24.8330 702.0000  
24.8530 700.0000  
24.8720 700.0000  
24.8920 703.0000  
24.9110 705.0000  
24.9310 707.0000  
24.9500 708.0000  
24.9700 707.0000  
24.9890 706.0000  
25.0080 704.0000  
25.0280 702.0000  
25.0470 700.0000  
25.0670 697.0000  
25.0860 694.0000  
25.1060 691.0000  
25.1250 687.0000  
25.1450 684.0000  
25.1640 681.0000  
25.1830 678.0000  
25.2030 675.0000  
25.2220 672.0000  
25.2420 669.0000  
25.2610 667.0000  
25.2810 664.0000  
25.3000 664.0000  
25.3200 665.0000  
25.3390 668.0000  
25.3580 672.0000  
25.3780 678.0000  
25.3970 682.0000  
25.4170 683.0000  
25.4360 682.0000  
25.4560 676.0000  
25.4750 668.0000

25.4950 659.0000  
25.5140 650.0000  
25.5330 644.0000  
25.5530 642.0000  
25.5720 644.0000  
25.5920 648.0000  
25.6110 654.0000  
25.6310 660.0000  
25.6500 663.0000  
25.6700 663.0000  
25.6890 661.0000  
25.7080 658.0000  
25.7280 655.0000  
25.7470 653.0000  
25.7670 652.0000  
25.7860 652.0000  
25.8060 651.0000  
25.8250 650.0000  
25.8450 648.0000  
25.8640 645.0000  
25.8830 643.0000  
25.9030 642.0000  
25.9220 642.0000  
25.9420 642.0000  
25.9610 643.0000  
25.9810 642.0000  
26.0000 641.0000  
26.0200 637.0000  
26.0390 632.0000  
26.0580 627.0000  
26.0780 621.0000  
26.0970 616.0000  
26.1170 612.0000  
26.1360 612.0000  
26.1560 614.0000  
26.1750 617.0000  
26.1950 621.0000  
26.2140 624.0000  
26.2330 627.0000  
26.2530 628.0000  
26.2720 626.0000  
26.2920 623.0000  
26.3110 619.0000  
26.3310 614.0000

26.3500 610.0000  
26.3700 606.0000  
26.3890 604.0000  
26.4080 603.0000  
26.4280 603.0000  
26.4470 602.0000  
26.4670 601.0000  
26.4860 600.0000  
26.5060 597.0000  
26.5250 595.0000  
26.5450 594.0000  
26.5640 593.0000  
26.5830 592.0000  
26.6030 592.0000  
26.6220 590.0000  
26.6420 588.0000  
26.6610 586.0000  
26.6810 584.0000  
26.7000 582.0000  
26.7200 582.0000  
26.7390 583.0000  
26.7580 585.0000  
26.7780 587.0000  
26.7970 589.0000  
26.8170 591.0000  
26.8360 590.0000  
26.8560 589.0000  
26.8750 586.0000  
26.8950 582.0000  
26.9140 579.0000  
26.9330 577.0000  
26.9530 575.0000  
26.9720 574.0000  
26.9920 574.0000  
27.0110 574.0000  
27.0310 575.0000  
27.0500 577.0000  
27.0700 578.0000  
27.0890 580.0000  
27.1080 580.0000  
27.1280 579.0000  
27.1470 577.0000  
27.1670 573.0000  
27.1860 568.0000

27.2060 565.0000  
27.2250 563.0000  
27.2450 564.0000  
27.2640 567.0000  
27.2830 572.0000  
27.3030 577.0000  
27.3220 581.0000  
27.3420 582.0000  
27.3610 580.0000  
27.3810 577.0000  
27.4000 573.0000  
27.4200 569.0000  
27.4390 566.0000  
27.4580 565.0000  
27.4780 565.0000  
27.4970 566.0000  
27.5170 566.0000  
27.5360 567.0000  
27.5560 567.0000  
27.5750 568.0000  
27.5950 569.0000  
27.6140 569.0000  
27.6330 568.0000  
27.6530 566.0000  
27.6720 563.0000  
27.6920 558.0000  
27.7110 554.0000  
27.7310 551.0000  
27.7500 548.0000  
27.7700 547.0000  
27.7890 546.0000  
27.8080 544.0000  
27.8280 541.0000  
27.8470 538.0000  
27.8670 534.0000  
27.8860 531.0000  
27.9060 530.0000  
27.9250 529.0000  
27.9450 530.0000  
27.9640 531.0000  
27.9830 532.0000  
28.0030 534.0000  
28.0220 535.0000  
28.0420 537.0000

28.0610 539.0000  
28.0810 542.0000  
28.1000 545.0000  
28.1200 547.0000  
28.1390 547.0000  
28.1580 545.0000  
28.1780 540.0000  
28.1970 534.0000  
28.2170 526.0000  
28.2360 519.0000  
28.2560 514.0000  
28.2750 512.0000  
28.2950 512.0000  
28.3140 515.0000  
28.3330 520.0000  
28.3530 523.0000  
28.3720 526.0000  
28.3920 527.0000  
28.4110 527.0000  
28.4310 525.0000  
28.4500 523.0000  
28.4700 521.0000  
28.4890 519.0000  
28.5080 518.0000  
28.5280 517.0000  
28.5470 517.0000  
28.5670 517.0000  
28.5860 518.0000  
28.6060 519.0000  
28.6250 520.0000  
28.6450 521.0000  
28.6640 523.0000  
28.6830 525.0000  
28.7030 527.0000  
28.7220 528.0000  
28.7420 527.0000  
28.7610 524.0000  
28.7810 521.0000  
28.8000 516.0000  
28.8200 512.0000  
28.8390 509.0000  
28.8580 508.0000  
28.8780 508.0000  
28.8970 509.0000

28.9170 510.0000  
28.9360 511.0000  
28.9560 512.0000  
28.9750 511.0000  
28.9950 509.0000  
29.0140 507.0000  
29.0330 504.0000  
29.0530 501.0000  
29.0720 499.0000  
29.0920 496.0000  
29.1110 494.0000  
29.1310 492.0000  
29.1500 491.0000  
29.1700 491.0000  
29.1890 491.0000  
29.2080 492.0000  
29.2280 492.0000  
29.2470 493.0000  
29.2670 493.0000  
29.2860 494.0000  
29.3060 495.0000  
29.3250 497.0000  
29.3450 500.0000  
29.3640 504.0000  
29.3830 508.0000  
29.4030 512.0000  
29.4220 513.0000  
29.4420 513.0000  
29.4610 511.0000  
29.4810 506.0000  
29.5000 499.0000  
29.5200 493.0000  
29.5390 486.0000  
29.5580 482.0000  
29.5780 480.0000  
29.5970 480.0000  
29.6170 482.0000  
29.6360 485.0000  
29.6560 488.0000  
29.6750 489.0000  
29.6950 488.0000  
29.7140 485.0000  
29.7330 479.0000  
29.7530 473.0000



29.7720 468.0000  
29.7920 464.0000  
29.8110 463.0000  
29.8310 464.0000  
29.8500 468.0000  
29.8700 472.0000  
29.8890 475.0000  
29.9080 476.0000  
29.9280 475.0000  
29.9470 472.0000  
29.9670 468.0000  
29.9860 465.0000  
30.0060 463.0000  
30.0250 464.0000  
30.0450 466.0000  
30.0640 469.0000  
30.0830 471.0000  
30.1030 473.0000  
30.1220 472.0000  
30.1420 470.0000  
30.1610 467.0000  
30.1810 463.0000  
30.2000 460.0000  
30.2200 457.0000  
30.2390 454.0000  
30.2580 453.0000  
30.2780 453.0000  
30.2970 455.0000  
30.3170 457.0000  
30.3360 460.0000  
30.3560 463.0000  
30.3750 465.0000  
30.3950 466.0000  
30.4140 466.0000  
30.4330 467.0000  
30.4530 468.0000  
30.4720 468.0000  
30.4920 467.0000  
30.5110 466.0000  
30.5310 463.0000  
30.5500 459.0000  
30.5700 454.0000  
30.5890 450.0000  
30.6080 446.0000

30.6280 443.0000  
30.6470 441.0000  
30.6670 438.0000  
30.6860 436.0000  
30.7060 434.0000  
30.7250 433.0000  
30.7450 435.0000  
30.7640 438.0000  
30.7830 442.0000  
30.8030 448.0000  
30.8220 452.0000  
30.8420 455.0000  
30.8610 455.0000  
30.8810 454.0000  
30.9000 451.0000  
30.9200 448.0000  
30.9390 447.0000  
30.9580 447.0000  
30.9780 449.0000  
30.9970 452.0000  
31.0170 455.0000  
31.0360 457.0000  
31.0560 458.0000  
31.0750 456.0000  
31.0950 452.0000  
31.1140 446.0000  
31.1330 441.0000  
31.1530 438.0000  
31.1720 436.0000  
31.1920 436.0000  
31.2110 437.0000  
31.2310 439.0000  
31.2500 441.0000  
31.2700 442.0000  
31.2890 444.0000  
31.3080 444.0000  
31.3280 445.0000  
31.3470 446.0000  
31.3670 447.0000  
31.3860 448.0000  
31.4060 448.0000  
31.4250 447.0000  
31.4450 445.0000  
31.4640 442.0000

31.4830 439.0000  
31.5030 437.0000  
31.5220 435.0000  
31.5420 434.0000  
31.5610 434.0000  
31.5810 434.0000  
31.6000 433.0000  
31.6200 434.0000  
31.6390 434.0000  
31.6580 434.0000  
31.6780 436.0000  
31.6970 439.0000  
31.7170 442.0000  
31.7360 445.0000  
31.7560 446.0000  
31.7750 446.0000  
31.7950 444.0000  
31.8140 440.0000  
31.8330 435.0000  
31.8530 432.0000  
31.8720 430.0000  
31.8920 430.0000  
31.9110 431.0000  
31.9310 434.0000  
31.9500 436.0000  
31.9700 437.0000  
31.9890 436.0000  
32.0080 435.0000  
32.0280 432.0000  
32.0470 431.0000  
32.0670 430.0000  
32.0860 431.0000  
32.1060 433.0000  
32.1250 436.0000  
32.1450 439.0000  
32.1640 441.0000  
32.1830 442.0000  
32.2030 442.0000  
32.2220 439.0000  
32.2420 435.0000  
32.2610 430.0000  
32.2810 424.0000  
32.3000 419.0000  
32.3200 414.0000

32.3390 411.0000  
32.3580 410.0000  
32.3780 410.0000  
32.3970 410.0000  
32.4170 412.0000  
32.4360 413.0000  
32.4560 416.0000  
32.4750 419.0000  
32.4950 424.0000  
32.5140 429.0000  
32.5330 435.0000  
32.5530 440.0000  
32.5720 445.0000  
32.5920 447.0000  
32.6110 447.0000  
32.6310 444.0000  
32.6500 440.0000  
32.6700 434.0000  
32.6890 428.0000  
32.7080 423.0000  
32.7280 418.0000  
32.7470 416.0000  
32.7670 414.0000  
32.7860 414.0000  
32.8060 413.0000  
32.8250 412.0000  
32.8450 411.0000  
32.8640 409.0000  
32.8830 407.0000  
32.9030 406.0000  
32.9220 407.0000  
32.9420 409.0000  
32.9610 412.0000  
32.9810 416.0000  
33.0000 421.0000  
33.0200 424.0000  
33.0390 425.0000  
33.0580 425.0000  
33.0780 423.0000  
33.0970 421.0000  
33.1170 419.0000  
33.1360 418.0000  
33.1560 418.0000  
33.1750 419.0000

33.1950 418.0000  
33.2140 417.0000  
33.2330 416.0000  
33.2530 414.0000  
33.2720 414.0000  
33.2920 415.0000  
33.3110 417.0000  
33.3310 420.0000  
33.3500 422.0000  
33.3700 423.0000  
33.3890 422.0000  
33.4080 418.0000  
33.4280 414.0000  
33.4470 410.0000  
33.4670 408.0000  
33.4860 407.0000  
33.5060 408.0000  
33.5250 411.0000  
33.5450 413.0000  
33.5640 414.0000  
33.5830 414.0000  
33.6030 412.0000  
33.6220 409.0000  
33.6420 406.0000  
33.6610 405.0000  
33.6810 404.0000  
33.7000 405.0000  
33.7200 407.0000  
33.7390 408.0000  
33.7580 410.0000  
33.7780 410.0000  
33.7970 410.0000  
33.8170 409.0000  
33.8360 407.0000  
33.8560 405.0000  
33.8750 402.0000  
33.8950 398.0000  
33.9140 393.0000  
33.9330 389.0000  
33.9530 385.0000  
33.9720 383.0000  
33.9920 384.0000  
34.0110 386.0000  
34.0310 390.0000

34.0500 396.0000  
34.0700 401.0000  
34.0890 404.0000  
34.1080 406.0000  
34.1280 405.0000  
34.1470 403.0000  
34.1670 399.0000  
34.1860 397.0000  
34.2060 395.0000  
34.2250 396.0000  
34.2450 398.0000  
34.2640 402.0000  
34.2830 405.0000  
34.3030 407.0000  
34.3220 407.0000  
34.3420 405.0000  
34.3610 401.0000  
34.3810 396.0000  
34.4000 393.0000  
34.4200 392.0000  
34.4390 394.0000  
34.4580 398.0000  
34.4780 404.0000  
34.4970 409.0000  
34.5170 412.0000  
34.5360 413.0000  
34.5560 411.0000  
34.5750 407.0000  
34.5950 401.0000  
34.6140 396.0000  
34.6330 392.0000  
34.6530 389.0000  
34.6720 389.0000  
34.6920 391.0000  
34.7110 393.0000  
34.7310 395.0000  
34.7500 396.0000  
34.7700 396.0000  
34.7890 394.0000  
34.8080 393.0000  
34.8280 391.0000  
34.8470 390.0000  
34.8670 389.0000  
34.8860 388.0000

34.9060 387.0000  
34.9250 384.0000  
34.9450 380.0000  
34.9640 375.0000  
34.9830 370.0000  
35.0030 367.0000  
35.0220 366.0000  
35.0420 367.0000  
35.0610 369.0000  
35.0810 373.0000  
35.1000 375.0000  
35.1200 378.0000  
35.1390 379.0000  
35.1580 380.0000  
35.1780 381.0000  
35.1970 382.0000  
35.2170 383.0000  
35.2360 382.0000  
35.2560 380.0000  
35.2750 377.0000  
35.2950 373.0000  
35.3140 370.0000  
35.3330 368.0000  
35.3530 367.0000  
35.3720 368.0000  
35.3920 369.0000  
35.4110 371.0000  
35.4310 371.0000  
35.4500 371.0000  
35.4700 371.0000  
35.4890 372.0000  
35.5080 374.0000  
35.5280 376.0000  
35.5470 379.0000  
35.5670 382.0000  
35.5860 384.0000  
35.6060 385.0000  
35.6250 385.0000  
35.6450 384.0000  
35.6640 382.0000  
35.6830 381.0000  
35.7030 380.0000  
35.7220 379.0000  
35.7420 380.0000

35.7610 381.0000  
35.7810 382.0000  
35.8000 383.0000  
35.8200 384.0000  
35.8390 382.0000  
35.8580 380.0000  
35.8780 375.0000  
35.8970 371.0000  
35.9170 367.0000  
35.9360 364.0000  
35.9560 362.0000  
35.9750 362.0000  
35.9950 363.0000  
36.0140 363.0000  
36.0330 364.0000  
36.0530 364.0000  
36.0720 366.0000  
36.0920 367.0000  
36.1110 370.0000  
36.1310 373.0000  
36.1500 375.0000  
36.1700 377.0000  
36.1890 377.0000  
36.2080 376.0000  
36.2280 375.0000  
36.2470 373.0000  
36.2670 373.0000  
36.2860 373.0000  
36.3060 374.0000  
36.3250 375.0000  
36.3450 376.0000  
36.3640 377.0000  
36.3830 378.0000  
36.4030 378.0000  
36.4220 377.0000  
36.4420 375.0000  
36.4610 372.0000  
36.4810 369.0000  
36.5000 365.0000  
36.5200 362.0000  
36.5390 359.0000  
36.5580 357.0000  
36.5780 355.0000  
36.5970 353.0000



36.6170 353.0000  
36.6360 353.0000  
36.6560 354.0000  
36.6750 356.0000  
36.6950 358.0000  
36.7140 361.0000  
36.7330 363.0000  
36.7530 365.0000  
36.7720 366.0000  
36.7920 365.0000  
36.8110 363.0000  
36.8310 360.0000  
36.8500 356.0000  
36.8700 353.0000  
36.8890 350.0000  
36.9080 348.0000  
36.9280 346.0000  
36.9470 345.0000  
36.9670 344.0000  
36.9860 343.0000  
37.0060 342.0000  
37.0250 341.0000  
37.0450 340.0000  
37.0640 340.0000  
37.0830 342.0000  
37.1030 344.0000  
37.1220 348.0000  
37.1420 351.0000  
37.1610 355.0000  
37.1810 357.0000  
37.2000 359.0000  
37.2200 359.0000  
37.2390 358.0000  
37.2580 357.0000  
37.2780 356.0000  
37.2970 354.0000  
37.3170 352.0000  
37.3360 350.0000  
37.3560 348.0000  
37.3750 346.0000  
37.3950 345.0000  
37.4140 344.0000  
37.4330 343.0000  
37.4530 342.0000

37.4720 339.0000  
37.4920 337.0000  
37.5110 334.0000  
37.5310 332.0000  
37.5500 332.0000  
37.5700 334.0000  
37.5890 337.0000  
37.6080 342.0000  
37.6280 347.0000  
37.6470 350.0000  
37.6670 351.0000  
37.6860 350.0000  
37.7060 348.0000  
37.7250 346.0000  
37.7450 344.0000  
37.7640 343.0000  
37.7830 344.0000  
37.8030 345.0000  
37.8220 346.0000  
37.8420 346.0000  
37.8610 345.0000  
37.8810 344.0000  
37.9000 341.0000  
37.9200 339.0000  
37.9390 337.0000  
37.9580 338.0000  
37.9780 339.0000  
37.9970 341.0000  
38.0170 343.0000  
38.0360 344.0000  
38.0560 343.0000  
38.0750 341.0000  
38.0950 338.0000  
38.1140 336.0000  
38.1330 334.0000  
38.1530 334.0000  
38.1720 336.0000  
38.1920 338.0000  
38.2110 340.0000  
38.2310 341.0000  
38.2500 341.0000  
38.2700 339.0000  
38.2890 337.0000  
38.3080 333.0000

38.3280 329.0000  
38.3470 324.0000  
38.3670 320.0000  
38.3860 319.0000  
38.4060 320.0000  
38.4250 324.0000  
38.4450 330.0000  
38.4640 335.0000  
38.4830 339.0000  
38.5030 340.0000  
38.5220 337.0000  
38.5420 331.0000  
38.5610 324.0000  
38.5810 317.0000  
38.6000 313.0000  
38.6200 311.0000  
38.6390 311.0000  
38.6580 314.0000  
38.6780 318.0000  
38.6970 321.0000  
38.7170 325.0000  
38.7360 327.0000  
38.7560 329.0000  
38.7750 331.0000  
38.7950 332.0000  
38.8140 333.0000  
38.8330 333.0000  
38.8530 331.0000  
38.8720 328.0000  
38.8920 325.0000  
38.9110 320.0000  
38.9310 316.0000  
38.9500 313.0000  
38.9700 310.0000  
38.9890 310.0000  
39.0080 311.0000  
39.0280 313.0000  
39.0470 317.0000  
39.0670 320.0000  
39.0860 324.0000  
39.1060 327.0000  
39.1250 329.0000  
39.1450 331.0000  
39.1640 331.0000

39.1830 331.0000  
39.2030 329.0000  
39.2220 327.0000  
39.2420 324.0000  
39.2610 321.0000  
39.2810 320.0000  
39.3000 318.0000  
39.3200 318.0000  
39.3390 318.0000  
39.3580 318.0000  
39.3780 318.0000  
39.3970 318.0000  
39.4170 319.0000  
39.4360 319.0000  
39.4560 321.0000  
39.4750 322.0000  
39.4950 323.0000  
39.5140 323.0000  
39.5330 321.0000  
39.5530 320.0000  
39.5720 318.0000  
39.5920 316.0000  
39.6110 314.0000  
39.6310 313.0000  
39.6500 312.0000  
39.6700 311.0000  
39.6890 311.0000  
39.7080 310.0000  
39.7280 309.0000  
39.7470 308.0000  
39.7670 308.0000  
39.7860 307.0000  
39.8060 306.0000  
39.8250 304.0000  
39.8450 303.0000  
39.8640 304.0000  
39.8830 305.0000  
39.9030 308.0000  
39.9220 312.0000  
39.9420 316.0000  
39.9610 318.0000  
39.9810 318.0000  
40.0000 317.0000  
40.0200 313.0000

40.0390 308.0000  
40.0580 304.0000  
40.0780 301.0000  
40.0970 300.0000  
40.1170 300.0000  
40.1360 301.0000  
40.1560 303.0000  
40.1750 305.0000  
40.1950 305.0000  
40.2140 305.0000  
40.2330 304.0000  
40.2530 302.0000  
40.2720 300.0000  
40.2920 299.0000  
40.3110 297.0000  
40.3310 297.0000  
40.3500 296.0000  
40.3700 296.0000  
40.3890 296.0000  
40.4080 295.0000  
40.4280 295.0000  
40.4470 295.0000  
40.4670 295.0000  
40.4860 296.0000  
40.5060 297.0000  
40.5250 298.0000  
40.5450 298.0000  
40.5640 298.0000  
40.5830 298.0000  
40.6030 297.0000  
40.6220 297.0000  
40.6420 297.0000  
40.6610 297.0000  
40.6810 298.0000  
40.7000 299.0000  
40.7200 299.0000  
40.7390 299.0000  
40.7580 298.0000  
40.7780 296.0000  
40.7970 294.0000  
40.8170 292.0000  
40.8360 291.0000  
40.8560 291.0000  
40.8750 292.0000

40.8950 293.0000  
40.9140 294.0000  
40.9330 295.0000  
40.9530 296.0000  
40.9720 296.0000  
40.9920 298.0000  
41.0110 299.0000  
41.0310 301.0000  
41.0500 302.0000  
41.0700 303.0000  
41.0890 301.0000  
41.1080 299.0000  
41.1280 295.0000  
41.1470 292.0000  
41.1670 290.0000  
41.1860 289.0000  
41.2060 290.0000  
41.2250 292.0000  
41.2450 293.0000  
41.2640 293.0000  
41.2830 290.0000  
41.3030 286.0000  
41.3220 282.0000  
41.3420 277.0000  
41.3610 275.0000  
41.3810 275.0000  
41.4000 276.0000  
41.4200 279.0000  
41.4390 282.0000  
41.4580 284.0000  
41.4780 285.0000  
41.4970 284.0000  
41.5170 283.0000  
41.5360 282.0000  
41.5560 282.0000  
41.5750 283.0000  
41.5950 285.0000  
41.6140 288.0000  
41.6330 291.0000  
41.6530 293.0000  
41.6720 294.0000  
41.6920 293.0000  
41.7110 292.0000  
41.7310 290.0000

41.7500 289.0000  
41.7700 288.0000  
41.7890 289.0000  
41.8080 290.0000  
41.8280 292.0000  
41.8470 292.0000  
41.8670 292.0000  
41.8860 290.0000  
41.9060 287.0000  
41.9250 283.0000  
41.9450 280.0000  
41.9640 278.0000  
41.9830 277.0000  
42.0030 278.0000  
42.0220 280.0000  
42.0420 283.0000  
42.0610 286.0000  
42.0810 288.0000  
42.1000 290.0000  
42.1200 289.0000  
42.1390 288.0000  
42.1580 284.0000  
42.1780 280.0000  
42.1970 276.0000  
42.2170 273.0000  
42.2360 271.0000  
42.2560 271.0000  
42.2750 273.0000  
42.2950 275.0000  
42.3140 277.0000  
42.3330 277.0000  
42.3530 277.0000  
42.3720 275.0000  
42.3920 273.0000  
42.4110 270.0000  
42.4310 269.0000  
42.4500 269.0000  
42.4700 269.0000  
42.4890 271.0000  
42.5080 272.0000  
42.5280 273.0000  
42.5470 272.0000  
42.5670 271.0000  
42.5860 269.0000

42.6060 268.0000  
42.6250 268.0000  
42.6450 269.0000  
42.6640 270.0000  
42.6830 272.0000  
42.7030 274.0000  
42.7220 275.0000  
42.7420 275.0000  
42.7610 274.0000  
42.7810 273.0000  
42.8000 271.0000  
42.8200 271.0000  
42.8390 271.0000  
42.8580 272.0000  
42.8780 272.0000  
42.8970 273.0000  
42.9170 272.0000  
42.9360 272.0000  
42.9560 272.0000  
42.9750 273.0000  
42.9950 274.0000  
43.0140 276.0000  
43.0330 278.0000  
43.0530 280.0000  
43.0720 280.0000  
43.0920 279.0000  
43.1110 277.0000  
43.1310 274.0000  
43.1500 271.0000  
43.1700 268.0000  
43.1890 266.0000  
43.2080 265.0000  
43.2280 265.0000  
43.2470 266.0000  
43.2670 268.0000  
43.2860 270.0000  
43.3060 272.0000  
43.3250 274.0000  
43.3450 274.0000  
43.3640 274.0000  
43.3830 272.0000  
43.4030 269.0000  
43.4220 267.0000  
43.4420 265.0000



43.4610 264.0000  
43.4810 265.0000  
43.5000 266.0000  
43.5200 269.0000  
43.5390 271.0000  
43.5580 273.0000  
43.5780 274.0000  
43.5970 274.0000  
43.6170 273.0000  
43.6360 272.0000  
43.6560 270.0000  
43.6750 268.0000  
43.6950 267.0000  
43.7140 266.0000  
43.7330 266.0000  
43.7530 267.0000  
43.7720 268.0000  
43.7920 268.0000  
43.8110 267.0000  
43.8310 266.0000  
43.8500 265.0000  
43.8700 265.0000  
43.8890 265.0000  
43.9080 267.0000  
43.9280 269.0000  
43.9470 272.0000  
43.9670 274.0000  
43.9860 275.0000  
44.0060 274.0000  
44.0250 271.0000  
44.0450 268.0000  
44.0640 264.0000  
44.0830 261.0000  
44.1030 258.0000  
44.1220 256.0000  
44.1420 256.0000  
44.1610 257.0000  
44.1810 259.0000  
44.2000 261.0000  
44.2200 263.0000  
44.2390 264.0000  
44.2580 265.0000  
44.2780 265.0000  
44.2970 264.0000

44.3170 264.0000  
44.3360 264.0000  
44.3560 266.0000  
44.3750 269.0000  
44.3950 273.0000  
44.4140 276.0000  
44.4330 279.0000  
44.4530 279.0000  
44.4720 278.0000  
44.4920 274.0000  
44.5110 270.0000  
44.5310 266.0000  
44.5500 261.0000  
44.5700 258.0000  
44.5890 256.0000  
44.6080 255.0000  
44.6280 255.0000  
44.6470 255.0000  
44.6670 256.0000  
44.6860 256.0000  
44.7060 256.0000  
44.7250 256.0000  
44.7450 256.0000  
44.7640 257.0000  
44.7830 258.0000  
44.8030 259.0000  
44.8220 261.0000  
44.8420 262.0000  
44.8610 263.0000  
44.8810 263.0000  
44.9000 261.0000  
44.9200 259.0000  
44.9390 255.0000  
44.9580 251.0000  
44.9780 246.0000  
44.9970 241.0000  
45.0170 238.0000  
45.0360 236.0000  
45.0560 237.0000  
45.0750 239.0000  
45.0950 242.0000  
45.1140 245.0000  
45.1330 249.0000  
45.1530 252.0000

45.1720 254.0000  
45.1920 254.0000  
45.2110 255.0000  
45.2310 254.0000  
45.2500 253.0000  
45.2700 253.0000  
45.2890 252.0000  
45.3080 251.0000  
45.3280 250.0000  
45.3470 249.0000  
45.3670 249.0000  
45.3860 249.0000  
45.4060 248.0000  
45.4250 248.0000  
45.4450 247.0000  
45.4640 246.0000  
45.4830 246.0000  
45.5030 246.0000  
45.5220 247.0000  
45.5420 250.0000  
45.5610 252.0000  
45.5810 253.0000  
45.6000 253.0000  
45.6200 251.0000  
45.6390 246.0000  
45.6580 241.0000  
45.6780 236.0000  
45.6970 234.0000  
45.7170 233.0000  
45.7360 236.0000  
45.7560 240.0000  
45.7750 245.0000  
45.7950 250.0000  
45.8140 252.0000  
45.8330 253.0000  
45.8530 252.0000  
45.8720 250.0000  
45.8920 248.0000  
45.9110 246.0000  
45.9310 245.0000  
45.9500 244.0000  
45.9700 245.0000  
45.9890 245.0000  
46.0080 246.0000

46.0280 245.0000  
46.0470 244.0000  
46.0670 243.0000  
46.0860 243.0000  
46.1060 242.0000  
46.1250 242.0000  
46.1450 243.0000  
46.1640 243.0000  
46.1830 244.0000  
46.2030 244.0000  
46.2220 245.0000  
46.2420 245.0000  
46.2610 246.0000  
46.2810 246.0000  
46.3000 246.0000  
46.3200 244.0000  
46.3390 242.0000  
46.3580 239.0000  
46.3780 236.0000  
46.3970 233.0000  
46.4170 231.0000  
46.4360 231.0000  
46.4560 231.0000  
46.4750 233.0000  
46.4950 234.0000  
46.5140 236.0000  
46.5330 238.0000  
46.5530 239.0000  
46.5720 240.0000  
46.5920 242.0000  
46.6110 243.0000  
46.6310 245.0000  
46.6500 246.0000  
46.6700 246.0000  
46.6890 246.0000  
46.7080 245.0000  
46.7280 244.0000  
46.7470 244.0000  
46.7670 243.0000  
46.7860 243.0000  
46.8060 242.0000  
46.8250 241.0000  
46.8450 240.0000  
46.8640 239.0000

46.8830 239.0000  
46.9030 239.0000  
46.9220 239.0000  
46.9420 239.0000  
46.9610 240.0000  
46.9810 239.0000  
47.0000 238.0000  
47.0200 235.0000  
47.0390 232.0000  
47.0580 228.0000  
47.0780 224.0000  
47.0970 221.0000  
47.1170 220.0000  
47.1360 220.0000  
47.1560 221.0000  
47.1750 223.0000  
47.1950 225.0000  
47.2140 227.0000  
47.2330 230.0000  
47.2530 232.0000  
47.2720 234.0000  
47.2920 236.0000  
47.3110 236.0000  
47.3310 235.0000  
47.3500 233.0000  
47.3700 230.0000  
47.3890 228.0000  
47.4080 226.0000  
47.4280 226.0000  
47.4470 225.0000  
47.4670 225.0000  
47.4860 225.0000  
47.5060 223.0000  
47.5250 220.0000  
47.5450 217.0000  
47.5640 214.0000  
47.5830 213.0000  
47.6030 212.0000  
47.6220 214.0000  
47.6420 216.0000  
47.6610 218.0000  
47.6810 219.0000  
47.7000 220.0000  
47.7200 219.0000

47.7390 218.0000  
47.7580 218.0000  
47.7780 220.0000  
47.7970 223.0000  
47.8170 227.0000  
47.8360 231.0000  
47.8560 234.0000  
47.8750 235.0000  
47.8950 235.0000  
47.9140 234.0000  
47.9330 233.0000  
47.9530 230.0000  
47.9720 228.0000  
47.9920 225.0000  
48.0110 222.0000  
48.0310 219.0000  
48.0500 217.0000  
48.0700 216.0000  
48.0890 217.0000  
48.1080 220.0000  
48.1280 225.0000  
48.1470 230.0000  
48.1670 234.0000  
48.1860 238.0000  
48.2060 239.0000  
48.2250 238.0000  
48.2450 234.0000  
48.2640 230.0000  
48.2830 225.0000  
48.3030 221.0000  
48.3220 217.0000  
48.3420 215.0000  
48.3610 215.0000  
48.3810 216.0000  
48.4000 217.0000  
48.4200 218.0000  
48.4390 219.0000  
48.4580 220.0000  
48.4780 220.0000  
48.4970 220.0000  
48.5170 220.0000  
48.5360 218.0000  
48.5560 216.0000  
48.5750 213.0000

48.5950 211.0000  
48.6140 209.0000  
48.6330 208.0000  
48.6530 208.0000  
48.6720 209.0000  
48.6920 208.0000  
48.7110 207.0000  
48.7310 206.0000  
48.7500 204.0000  
48.7700 204.0000  
48.7890 205.0000  
48.8080 207.0000  
48.8280 210.0000  
48.8470 212.0000  
48.8670 213.0000  
48.8860 214.0000  
48.9060 213.0000  
48.9250 212.0000  
48.9450 213.0000  
48.9640 214.0000  
48.9830 215.0000  
49.0030 216.0000  
49.0220 217.0000  
49.0420 217.0000  
49.0610 217.0000  
49.0810 216.0000  
49.1000 215.0000  
49.1200 214.0000  
49.1390 214.0000  
49.1580 215.0000  
49.1780 216.0000  
49.1970 216.0000  
49.2170 216.0000  
49.2360 215.0000  
49.2560 213.0000  
49.2750 211.0000  
49.2950 209.0000  
49.3140 207.0000  
49.3330 205.0000  
49.3530 204.0000  
49.3720 204.0000  
49.3920 204.0000  
49.4110 205.0000  
49.4310 207.0000

49.4500 209.0000  
49.4700 210.0000  
49.4890 210.0000  
49.5080 209.0000  
49.5280 208.0000  
49.5470 207.0000  
49.5670 207.0000  
49.5860 207.0000  
49.6060 208.0000  
49.6250 209.0000  
49.6450 210.0000  
49.6640 210.0000  
49.6830 210.0000  
49.7030 210.0000  
49.7220 209.0000  
49.7420 209.0000  
49.7610 209.0000  
49.7810 210.0000  
49.8000 209.0000  
49.8200 209.0000  
49.8390 208.0000  
49.8580 207.0000  
49.8780 206.0000  
49.8970 205.0000  
49.9170 204.0000  
49.9360 203.0000  
49.9560 201.0000  
49.9750 199.0000  
49.9950 199.0000  
50.0140 199.0000  
50.0330 201.0000  
50.0530 204.0000  
50.0720 207.0000  
50.0920 209.0000  
50.1110 210.0000  
50.1310 209.0000  
50.1500 207.0000  
50.1700 204.0000  
50.1890 200.0000  
50.2080 197.0000  
50.2280 196.0000  
50.2470 195.0000  
50.2670 196.0000  
50.2860 197.0000



50.3060 199.0000  
50.3250 201.0000  
50.3450 202.0000  
50.3640 203.0000  
50.3830 203.0000  
50.4030 201.0000  
50.4220 199.0000  
50.4420 196.0000  
50.4610 193.0000  
50.4810 190.0000  
50.5000 188.0000  
50.5200 188.0000  
50.5390 188.0000  
50.5580 190.0000  
50.5780 193.0000  
50.5970 196.0000  
50.6170 198.0000  
50.6360 200.0000  
50.6560 201.0000  
50.6750 202.0000  
50.6950 202.0000  
50.7140 203.0000  
50.7330 204.0000  
50.7530 205.0000  
50.7720 207.0000  
50.7920 208.0000  
50.8110 210.0000  
50.8310 211.0000  
50.8500 210.0000  
50.8700 209.0000  
50.8890 207.0000  
50.9080 204.0000  
50.9280 202.0000  
50.9470 202.0000  
50.9670 202.0000  
50.9860 204.0000  
51.0060 206.0000  
51.0250 208.0000  
51.0450 209.0000  
51.0640 210.0000  
51.0830 209.0000  
51.1030 207.0000  
51.1220 204.0000  
51.1420 200.0000

51.1610 197.0000  
51.1810 193.0000  
51.2000 191.0000  
51.2200 189.0000  
51.2390 189.0000  
51.2580 189.0000  
51.2780 189.0000  
51.2970 189.0000  
51.3170 189.0000  
51.3360 189.0000  
51.3560 189.0000  
51.3750 189.0000  
51.3950 190.0000  
51.4140 191.0000  
51.4330 192.0000  
51.4530 193.0000  
51.4720 195.0000  
51.4920 197.0000  
51.5110 199.0000  
51.5310 201.0000  
51.5500 203.0000  
51.5700 205.0000  
51.5890 206.0000  
51.6080 207.0000  
51.6280 208.0000  
51.6470 207.0000  
51.6670 205.0000  
51.6860 202.0000  
51.7060 198.0000  
51.7250 194.0000  
51.7450 191.0000  
51.7640 189.0000  
51.7830 189.0000  
51.8030 191.0000  
51.8220 193.0000  
51.8420 195.0000  
51.8610 196.0000  
51.8810 195.0000  
51.9000 193.0000  
51.9200 189.0000  
51.9390 184.0000  
51.9580 181.0000  
51.9780 178.0000  
51.9970 178.0000

52.0170 178.0000  
52.0360 180.0000  
52.0560 181.0000  
52.0750 183.0000  
52.0950 184.0000  
52.1140 184.0000  
52.1330 184.0000  
52.1530 183.0000  
52.1720 183.0000  
52.1920 184.0000  
52.2110 186.0000  
52.2310 188.0000  
52.2500 190.0000  
52.2700 192.0000  
52.2890 193.0000  
52.3080 193.0000  
52.3280 192.0000  
52.3470 190.0000  
52.3670 187.0000  
52.3860 184.0000  
52.4060 182.0000  
52.4250 181.0000  
52.4450 180.0000  
52.4640 181.0000  
52.4830 183.0000  
52.5030 185.0000  
52.5220 187.0000  
52.5420 189.0000  
52.5610 189.0000  
52.5810 189.0000  
52.6000 187.0000  
52.6200 184.0000  
52.6390 182.0000  
52.6580 181.0000  
52.6780 179.0000  
52.6970 178.0000  
52.7170 177.0000  
52.7360 176.0000  
52.7560 175.0000  
52.7750 173.0000  
52.7950 172.0000  
52.8140 173.0000  
52.8330 174.0000  
52.8530 176.0000

52.8720 179.0000  
52.8920 182.0000  
52.9110 185.0000  
52.9310 187.0000  
52.9500 189.0000  
52.9700 190.0000  
52.9890 190.0000  
53.0080 189.0000  
53.0280 187.0000  
53.0470 185.0000  
53.0670 183.0000  
53.0860 182.0000  
53.1060 181.0000  
53.1250 180.0000  
53.1450 180.0000  
53.1640 180.0000  
53.1830 180.0000  
53.2030 180.0000  
53.2220 179.0000  
53.2420 178.0000  
53.2610 176.0000  
53.2810 175.0000  
53.3000 174.0000  
53.3200 174.0000  
53.3390 175.0000  
53.3580 177.0000  
53.3780 179.0000  
53.3970 181.0000  
53.4170 182.0000  
53.4360 183.0000  
53.4560 182.0000  
53.4750 180.0000  
53.4950 178.0000  
53.5140 176.0000  
53.5330 175.0000  
53.5530 175.0000  
53.5720 176.0000  
53.5920 177.0000  
53.6110 179.0000  
53.6310 180.0000  
53.6500 180.0000  
53.6700 179.0000  
53.6890 178.0000  
53.7080 176.0000

53.7280 175.0000  
53.7470 174.0000  
53.7670 175.0000  
53.7860 177.0000  
53.8060 179.0000  
53.8250 181.0000  
53.8450 181.0000  
53.8640 181.0000  
53.8830 180.0000  
53.9030 177.0000  
53.9220 175.0000  
53.9420 172.0000  
53.9610 170.0000  
53.9810 168.0000  
54.0000 166.0000  
54.0200 164.0000  
54.0390 163.0000  
54.0580 163.0000  
54.0780 163.0000  
54.0970 165.0000  
54.1170 168.0000  
54.1360 171.0000  
54.1560 173.0000  
54.1750 174.0000  
54.1950 175.0000  
54.2140 175.0000  
54.2330 174.0000  
54.2530 174.0000  
54.2720 174.0000  
54.2920 174.0000  
54.3110 175.0000  
54.3310 176.0000  
54.3500 177.0000  
54.3700 178.0000  
54.3890 178.0000  
54.4080 178.0000  
54.4280 178.0000  
54.4470 177.0000  
54.4670 176.0000  
54.4860 176.0000  
54.5060 176.0000  
54.5250 177.0000  
54.5450 178.0000  
54.5640 179.0000

54.5830 179.0000  
54.6030 178.0000  
54.6220 176.0000  
54.6420 173.0000  
54.6610 170.0000  
54.6810 167.0000  
54.7000 166.0000  
54.7200 166.0000  
54.7390 167.0000  
54.7580 169.0000  
54.7780 171.0000  
54.7970 171.0000  
54.8170 172.0000  
54.8360 171.0000  
54.8560 170.0000  
54.8750 170.0000  
54.8950 170.0000  
54.9140 171.0000  
54.9330 173.0000  
54.9530 175.0000  
54.9720 176.0000  
54.9920 176.0000  
55.0110 174.0000  
55.0310 172.0000  
55.0500 168.0000  
55.0700 165.0000  
55.0890 163.0000  
55.1080 162.0000  
55.1280 164.0000  
55.1470 166.0000  
55.1670 168.0000  
55.1860 169.0000  
55.2060 170.0000  
55.2250 169.0000  
55.2450 167.0000  
55.2640 166.0000  
55.2830 165.0000  
55.3030 166.0000  
55.3220 166.0000  
55.3420 167.0000  
55.3610 168.0000  
55.3810 169.0000  
55.4000 169.0000  
55.4200 169.0000

55.4390 170.0000  
55.4580 171.0000  
55.4780 173.0000  
55.4970 176.0000  
55.5170 178.0000  
55.5360 180.0000  
55.5560 179.0000  
55.5750 177.0000  
55.5950 173.0000  
55.6140 168.0000  
55.6330 164.0000  
55.6530 160.0000  
55.6720 159.0000  
55.6920 159.0000  
55.7110 161.0000  
55.7310 163.0000  
55.7500 165.0000  
55.7700 167.0000  
55.7890 168.0000  
55.8080 169.0000  
55.8280 170.0000  
55.8470 170.0000  
55.8670 170.0000  
55.8860 170.0000  
55.9060 170.0000  
55.9250 171.0000  
55.9450 171.0000  
55.9640 171.0000  
55.9830 171.0000  
56.0030 170.0000  
56.0220 171.0000  
56.0420 171.0000  
56.0610 172.0000  
56.0810 173.0000  
56.1000 174.0000  
56.1200 174.0000  
56.1390 173.0000  
56.1580 172.0000  
56.1780 169.0000  
56.1970 167.0000  
56.2170 165.0000  
56.2360 165.0000  
56.2560 166.0000  
56.2750 167.0000

56.2950 169.0000  
56.3140 169.0000  
56.3330 169.0000  
56.3530 167.0000  
56.3720 165.0000  
56.3920 163.0000  
56.4110 161.0000  
56.4310 160.0000  
56.4500 160.0000  
56.4700 161.0000  
56.4890 163.0000  
56.5080 165.0000  
56.5280 168.0000  
56.5470 170.0000  
56.5670 172.0000  
56.5860 172.0000  
56.6060 171.0000  
56.6250 169.0000  
56.6450 166.0000  
56.6640 163.0000  
56.6830 161.0000  
56.7030 161.0000  
56.7220 161.0000  
56.7420 162.0000  
56.7610 163.0000  
56.7810 164.0000  
56.8000 164.0000  
56.8200 164.0000  
56.8390 163.0000  
56.8580 163.0000  
56.8780 163.0000  
56.8970 163.0000  
56.9170 164.0000  
56.9360 164.0000  
56.9560 164.0000  
56.9750 164.0000  
56.9950 164.0000  
57.0140 164.0000  
57.0330 164.0000  
57.0530 165.0000  
57.0720 166.0000  
57.0920 168.0000  
57.1110 169.0000  
57.1310 170.0000



57.1500 170.0000  
57.1700 170.0000  
57.1890 170.0000  
57.2080 169.0000  
57.2280 168.0000  
57.2470 167.0000  
57.2670 166.0000  
57.2860 165.0000  
57.3060 164.0000  
57.3250 164.0000  
57.3450 165.0000  
57.3640 166.0000  
57.3830 167.0000  
57.4030 169.0000  
57.4220 170.0000  
57.4420 170.0000  
57.4610 171.0000  
57.4810 171.0000  
57.5000 171.0000  
57.5200 170.0000  
57.5390 168.0000  
57.5580 165.0000  
57.5780 162.0000  
57.5970 159.0000  
57.6170 157.0000  
57.6360 155.0000  
57.6560 155.0000  
57.6750 155.0000  
57.6950 155.0000  
57.7140 156.0000  
57.7330 156.0000  
57.7530 156.0000  
57.7720 156.0000  
57.7920 156.0000  
57.8110 157.0000  
57.8310 157.0000  
57.8500 157.0000  
57.8700 158.0000  
57.8890 158.0000  
57.9080 158.0000  
57.9280 158.0000  
57.9470 159.0000  
57.9670 160.0000  
57.9860 162.0000

58.0060 165.0000  
58.0250 168.0000  
58.0450 170.0000  
58.0640 172.0000  
58.0830 172.0000  
58.1030 171.0000  
58.1220 169.0000  
58.1420 166.0000  
58.1610 165.0000  
58.1810 163.0000  
58.2000 163.0000  
58.2200 163.0000  
58.2390 164.0000  
58.2580 165.0000  
58.2780 166.0000  
58.2970 167.0000  
58.3170 167.0000  
58.3360 166.0000  
58.3560 165.0000  
58.3750 163.0000  
58.3950 160.0000  
58.4140 157.0000  
58.4330 154.0000  
58.4530 151.0000  
58.4720 150.0000  
58.4920 149.0000  
58.5110 150.0000  
58.5310 152.0000  
58.5500 154.0000  
58.5700 157.0000  
58.5890 161.0000  
58.6080 165.0000  
58.6280 169.0000  
58.6470 172.0000  
58.6670 174.0000  
58.6860 174.0000  
58.7060 171.0000  
58.7250 167.0000  
58.7450 162.0000  
58.7640 157.0000  
58.7830 153.0000  
58.8030 151.0000  
58.8220 151.0000  
58.8420 152.0000

58.8610 154.0000  
58.8810 157.0000  
58.9000 160.0000  
58.9200 162.0000  
58.9390 164.0000  
58.9580 164.0000  
58.9780 164.0000  
58.9970 163.0000  
59.0170 161.0000  
59.0360 159.0000  
59.0560 158.0000  
59.0750 158.0000  
59.0950 158.0000  
59.1140 159.0000  
59.1330 161.0000  
59.1530 162.0000  
59.1720 163.0000  
59.1920 163.0000  
59.2110 163.0000  
59.2310 163.0000  
59.2500 162.0000  
59.2700 161.0000  
59.2890 159.0000  
59.3080 157.0000  
59.3280 154.0000  
59.3470 151.0000  
59.3670 149.0000  
59.3860 148.0000  
59.4060 147.0000  
59.4250 147.0000  
59.4450 147.0000  
59.4640 148.0000  
59.4830 148.0000  
59.5030 148.0000  
59.5220 148.0000  
59.5420 149.0000  
59.5610 150.0000  
59.5810 152.0000  
59.6000 154.0000  
59.6200 155.0000  
59.6390 155.0000  
59.6580 155.0000  
59.6780 154.0000  
59.6970 153.0000

59.7170 151.0000  
59.7360 149.0000  
59.7560 148.0000  
59.7750 146.0000  
59.7950 146.0000  
59.8140 147.0000  
59.8330 149.0000  
59.8530 151.0000  
59.8720 154.0000  
59.8920 156.0000  
59.9110 157.0000  
59.9310 158.0000  
59.9500 157.0000  
59.9700 155.0000  
59.9890 153.0000  
60.0080 153.0000  
60.0280 153.0000  
60.0470 154.0000  
60.0670 155.0000  
60.0860 157.0000  
60.1060 159.0000  
60.1250 159.0000  
60.1450 159.0000  
60.1640 159.0000  
60.1830 158.0000  
60.2030 157.0000  
60.2220 157.0000  
60.2420 158.0000  
60.2610 159.0000  
60.2810 160.0000  
60.3000 161.0000  
60.3200 161.0000  
60.3390 161.0000  
60.3580 161.0000  
60.3780 161.0000  
60.3970 162.0000  
60.4170 162.0000  
60.4360 162.0000  
60.4560 160.0000  
60.4750 158.0000  
60.4950 155.0000  
60.5140 152.0000  
60.5330 151.0000  
60.5530 151.0000

60.5720 152.0000  
60.5920 155.0000  
60.6110 158.0000  
60.6310 160.0000  
60.6500 161.0000  
60.6700 161.0000  
60.6890 160.0000  
60.7080 158.0000  
60.7280 157.0000  
60.7470 156.0000  
60.7670 156.0000  
60.7860 157.0000  
60.8060 159.0000  
60.8250 160.0000  
60.8450 161.0000  
60.8640 161.0000  
60.8830 161.0000  
60.9030 160.0000  
60.9220 158.0000  
60.9420 157.0000  
60.9610 156.0000  
60.9810 156.0000  
61.0000 156.0000  
61.0200 155.0000  
61.0390 154.0000  
61.0580 152.0000  
61.0780 150.0000  
61.0970 148.0000  
61.1170 146.0000  
61.1360 145.0000  
61.1560 145.0000  
61.1750 146.0000  
61.1950 148.0000  
61.2140 150.0000  
61.2330 152.0000  
61.2530 155.0000  
61.2720 157.0000  
61.2920 158.0000  
61.3110 158.0000  
61.3310 157.0000  
61.3500 156.0000  
61.3700 154.0000  
61.3890 152.0000  
61.4080 151.0000

61.4280 152.0000  
61.4470 153.0000  
61.4670 155.0000  
61.4860 156.0000  
61.5060 157.0000  
61.5250 155.0000  
61.5450 153.0000  
61.5640 149.0000  
61.5830 146.0000  
61.6030 144.0000  
61.6220 143.0000  
61.6420 144.0000  
61.6610 145.0000  
61.6810 147.0000  
61.7000 150.0000  
61.7200 153.0000  
61.7390 155.0000  
61.7580 156.0000  
61.7780 156.0000  
61.7970 156.0000  
61.8170 155.0000  
61.8360 154.0000  
61.8560 153.0000  
61.8750 152.0000  
61.8950 151.0000  
61.9140 151.0000  
61.9330 151.0000  
61.9530 151.0000  
61.9720 152.0000  
61.9920 152.0000  
62.0110 152.0000  
62.0310 152.0000  
62.0500 152.0000  
62.0700 153.0000  
62.0890 154.0000  
62.1080 156.0000  
62.1280 156.0000  
62.1470 157.0000  
62.1670 157.0000  
62.1860 157.0000  
62.2060 157.0000  
62.2250 157.0000  
62.2450 158.0000  
62.2640 158.0000

62.2830 158.0000  
62.3030 156.0000  
62.3220 154.0000  
62.3420 151.0000  
62.3610 148.0000  
62.3810 144.0000  
62.4000 142.0000  
62.4200 141.0000  
62.4390 141.0000  
62.4580 143.0000  
62.4780 145.0000  
62.4970 148.0000  
62.5170 151.0000  
62.5360 153.0000  
62.5560 154.0000  
62.5750 155.0000  
62.5950 155.0000  
62.6140 155.0000  
62.6330 154.0000  
62.6530 154.0000  
62.6720 154.0000  
62.6920 153.0000  
62.7110 153.0000  
62.7310 153.0000  
62.7500 153.0000  
62.7700 153.0000  
62.7890 154.0000  
62.8080 155.0000  
62.8280 155.0000  
62.8470 156.0000  
62.8670 156.0000  
62.8860 156.0000  
62.9060 156.0000  
62.9250 156.0000  
62.9450 155.0000  
62.9640 154.0000  
62.9830 153.0000  
63.0030 152.0000  
63.0220 152.0000  
63.0420 152.0000  
63.0610 152.0000  
63.0810 152.0000  
63.1000 151.0000  
63.1200 150.0000

63.1390 149.0000  
63.1580 149.0000  
63.1780 150.0000  
63.1970 152.0000  
63.2170 154.0000  
63.2360 155.0000  
63.2560 156.0000  
63.2750 155.0000  
63.2950 154.0000  
63.3140 151.0000  
63.3330 149.0000  
63.3530 146.0000  
63.3720 145.0000  
63.3920 144.0000  
63.4110 144.0000  
63.4310 144.0000  
63.4500 143.0000  
63.4700 143.0000  
63.4890 142.0000  
63.5080 141.0000  
63.5280 141.0000  
63.5470 142.0000  
63.5670 144.0000  
63.5860 146.0000  
63.6060 147.0000  
63.6250 148.0000  
63.6450 148.0000  
63.6640 148.0000  
63.6830 149.0000  
63.7030 149.0000  
63.7220 149.0000  
63.7420 149.0000  
63.7610 148.0000  
63.7810 147.0000  
63.8000 146.0000  
63.8200 146.0000  
63.8390 146.0000  
63.8580 147.0000  
63.8780 148.0000  
63.8970 150.0000  
63.9170 151.0000  
63.9360 152.0000  
63.9560 152.0000  
63.9750 152.0000



63.9950 151.0000  
64.0140 149.0000  
64.0340 148.0000  
64.0530 146.0000  
64.0720 144.0000  
64.0920 143.0000  
64.1110 143.0000  
64.1310 143.0000  
64.1500 145.0000  
64.1700 148.0000  
64.1890 150.0000  
64.2090 152.0000  
64.2280 153.0000  
64.2470 153.0000  
64.2670 152.0000  
64.2860 151.0000  
64.3060 151.0000  
64.3250 150.0000  
64.3450 150.0000  
64.3640 150.0000  
64.3830 150.0000  
64.4030 149.0000  
64.4220 148.0000  
64.4420 147.0000  
64.4610 146.0000  
64.4810 146.0000  
64.5000 147.0000  
64.5200 148.0000  
64.5390 149.0000  
64.5590 150.0000  
64.5780 151.0000  
64.5970 151.0000  
64.6170 151.0000  
64.6360 150.0000  
64.6560 149.0000  
64.6750 148.0000  
64.6950 147.0000  
64.7140 147.0000  
64.7340 147.0000  
64.7530 148.0000  
64.7720 149.0000  
64.7920 150.0000  
64.8110 150.0000  
64.8310 149.0000

64.8500 148.0000  
64.8700 147.0000  
64.8890 147.0000  
64.9090 147.0000  
64.9280 147.0000  
64.9470 148.0000  
64.9670 149.0000  
64.9860 150.0000  
65.0060 151.0000  
65.0250 151.0000  
65.0450 150.0000  
65.0640 149.0000  
65.0840 147.0000  
65.1030 145.0000  
65.1220 144.0000  
65.1420 143.0000  
65.1610 143.0000  
65.1810 143.0000  
65.2000 144.0000  
65.2200 144.0000  
65.2390 144.0000  
65.2580 145.0000  
65.2780 145.0000  
65.2970 146.0000  
65.3170 147.0000  
65.3360 148.0000  
65.3560 149.0000  
65.3750 150.0000  
65.3950 151.0000  
65.4140 152.0000  
65.4340 153.0000  
65.4530 154.0000  
65.4720 154.0000  
65.4920 153.0000  
65.5110 152.0000  
65.5310 151.0000  
65.5500 150.0000  
65.5700 149.0000  
65.5890 149.0000  
65.6090 148.0000  
65.6280 149.0000  
65.6470 149.0000  
65.6670 149.0000  
65.6860 148.0000

65.7060 146.0000  
65.7250 143.0000  
65.7450 141.0000  
65.7640 139.0000  
65.7840 138.0000  
65.8030 138.0000  
65.8220 139.0000  
65.8420 141.0000  
65.8610 142.0000  
65.8810 143.0000  
65.9000 145.0000  
65.9200 146.0000  
65.9390 147.0000  
65.9590 148.0000  
65.9780 149.0000  
65.9970 149.0000  
66.0170 149.0000  
66.0360 148.0000  
66.0560 147.0000  
66.0750 147.0000  
66.0950 147.0000  
66.1140 148.0000  
66.1340 149.0000  
66.1530 150.0000  
66.1720 150.0000  
66.1920 149.0000  
66.2110 146.0000  
66.2310 141.0000  
66.2500 137.0000  
66.2700 134.0000  
66.2890 133.0000  
66.3090 135.0000  
66.3280 137.0000  
66.3470 141.0000  
66.3670 145.0000  
66.3860 148.0000  
66.4060 150.0000  
66.4250 150.0000  
66.4450 150.0000  
66.4640 148.0000  
66.4840 146.0000  
66.5030 144.0000  
66.5220 142.0000  
66.5420 141.0000

66.5610 141.0000  
66.5810 141.0000  
66.6000 142.0000  
66.6200 143.0000  
66.6390 144.0000  
66.6590 145.0000  
66.6780 146.0000  
66.6970 147.0000  
66.7170 147.0000  
66.7360 146.0000  
66.7560 145.0000  
66.7750 144.0000  
66.7950 143.0000  
66.8140 143.0000  
66.8340 144.0000  
66.8530 145.0000  
66.8720 146.0000  
66.8920 146.0000  
66.9110 146.0000  
66.9310 146.0000  
66.9500 145.0000  
66.9700 145.0000  
66.9890 144.0000  
67.0090 144.0000  
67.0280 144.0000  
67.0470 143.0000  
67.0670 143.0000  
67.0860 142.0000  
67.1060 142.0000  
67.1250 142.0000  
67.1450 143.0000  
67.1640 144.0000  
67.1840 145.0000  
67.2030 146.0000  
67.2220 147.0000  
67.2420 147.0000  
67.2610 148.0000  
67.2810 148.0000  
67.3000 149.0000  
67.3200 150.0000  
67.3390 150.0000  
67.3590 150.0000  
67.3780 148.0000  
67.3970 147.0000

67.4170 146.0000  
67.4360 145.0000  
67.4560 144.0000  
67.4750 144.0000  
67.4950 143.0000  
67.5140 142.0000  
67.5340 141.0000  
67.5530 140.0000  
67.5720 139.0000  
67.5920 139.0000  
67.6110 140.0000  
67.6310 141.0000  
67.6500 142.0000  
67.6700 143.0000  
67.6890 144.0000  
67.7090 145.0000  
67.7280 145.0000  
67.7470 145.0000  
67.7670 144.0000  
67.7860 143.0000  
67.8060 141.0000  
67.8250 140.0000  
67.8450 139.0000  
67.8640 138.0000  
67.8840 138.0000  
67.9030 137.0000  
67.9220 137.0000  
67.9420 137.0000  
67.9610 137.0000  
67.9810 138.0000  
68.0000 139.0000  
68.0200 139.0000  
68.0390 140.0000  
68.0590 141.0000  
68.0780 142.0000  
68.0970 144.0000  
68.1170 145.0000  
68.1360 146.0000  
68.1560 146.0000  
68.1750 145.0000  
68.1950 144.0000  
68.2140 143.0000  
68.2340 142.0000  
68.2530 142.0000

68.2720 143.0000  
68.2920 143.0000  
68.3110 143.0000  
68.3310 143.0000  
68.3500 141.0000  
68.3700 140.0000  
68.3890 139.0000  
68.4090 140.0000  
68.4280 141.0000  
68.4470 143.0000  
68.4670 146.0000  
68.4860 148.0000  
68.5060 149.0000  
68.5250 148.0000  
68.5450 146.0000  
68.5640 143.0000  
68.5840 140.0000  
68.6030 137.0000  
68.6220 135.0000  
68.6420 134.0000  
68.6610 134.0000  
68.6810 135.0000  
68.7000 136.0000  
68.7200 137.0000  
68.7390 139.0000  
68.7590 141.0000  
68.7780 143.0000  
68.7970 144.0000  
68.8170 144.0000  
68.8360 143.0000  
68.8560 141.0000  
68.8750 139.0000  
68.8950 137.0000  
68.9140 135.0000  
68.9340 135.0000  
68.9530 135.0000  
68.9720 137.0000  
68.9920 139.0000  
69.0110 140.0000  
69.0310 141.0000  
69.0500 141.0000  
69.0700 140.0000  
69.0890 139.0000  
69.1090 138.0000

69.1280 138.0000  
69.1470 138.0000  
69.1670 140.0000  
69.1860 141.0000  
69.2060 142.0000  
69.2250 143.0000  
69.2450 142.0000  
69.2640 142.0000  
69.2840 140.0000  
69.3030 138.0000  
69.3220 137.0000  
69.3420 137.0000  
69.3610 138.0000  
69.3810 139.0000  
69.4000 141.0000  
69.4200 142.0000  
69.4390 141.0000  
69.4590 140.0000  
69.4780 137.0000  
69.4970 133.0000  
69.5170 130.0000  
69.5360 127.0000  
69.5560 126.0000  
69.5750 127.0000  
69.5950 130.0000  
69.6140 133.0000  
69.6340 137.0000  
69.6530 140.0000  
69.6720 142.0000  
69.6920 143.0000  
69.7110 144.0000  
69.7310 144.0000  
69.7500 143.0000  
69.7700 143.0000  
69.7890 142.0000  
69.8090 142.0000  
69.8280 141.0000  
69.8470 141.0000  
69.8670 140.0000  
69.8860 140.0000  
69.9060 139.0000  
69.9250 138.0000  
69.9450 137.0000  
69.9640 136.0000

69.9840 136.0000  
70.0030 137.0000  
70.0220 139.0000  
70.0420 141.0000  
70.0610 143.0000  
70.0810 145.0000  
70.1000 145.0000  
70.1200 145.0000  
70.1390 143.0000  
70.1590 141.0000  
70.1780 139.0000  
70.1970 138.0000  
70.2170 138.0000  
70.2360 139.0000  
70.2560 141.0000  
70.2750 143.0000  
70.2950 144.0000  
70.3140 145.0000  
70.3340 144.0000  
70.3530 143.0000  
70.3720 141.0000  
70.3920 138.0000  
70.4110 135.0000  
70.4310 132.0000  
70.4500 130.0000  
70.4700 129.0000  
70.4890 129.0000  
70.5090 129.0000  
70.5280 130.0000  
70.5470 131.0000  
70.5670 132.0000  
70.5860 134.0000  
70.6060 135.0000  
70.6250 137.0000  
70.6450 138.0000  
70.6640 139.0000  
70.6840 140.0000  
70.7030 140.0000  
70.7220 141.0000  
70.7420 141.0000  
70.7610 141.0000  
70.7810 141.0000  
70.8000 140.0000  
70.8200 139.0000



70.8390 137.0000  
70.8590 135.0000  
70.8780 133.0000  
70.8970 131.0000  
70.9170 130.0000  
70.9360 129.0000  
70.9560 130.0000  
70.9750 130.0000  
70.9950 131.0000  
71.0140 131.0000  
71.0340 131.0000  
71.0530 131.0000  
71.0720 131.0000  
71.0920 131.0000  
71.1110 132.0000  
71.1310 133.0000  
71.1500 134.0000  
71.1700 136.0000  
71.1890 137.0000  
71.2090 138.0000  
71.2280 138.0000  
71.2470 139.0000  
71.2670 140.0000  
71.2860 141.0000  
71.3060 141.0000  
71.3250 141.0000  
71.3450 140.0000  
71.3640 138.0000  
71.3840 135.0000  
71.4030 132.0000  
71.4220 130.0000  
71.4420 128.0000  
71.4610 128.0000  
71.4810 129.0000  
71.5000 130.0000  
71.5200 132.0000  
71.5390 134.0000  
71.5590 136.0000  
71.5780 138.0000  
71.5970 139.0000  
71.6170 140.0000  
71.6360 141.0000  
71.6560 141.0000  
71.6750 141.0000

71.6950 140.0000  
71.7140 140.0000  
71.7340 139.0000  
71.7530 139.0000  
71.7720 139.0000  
71.7920 138.0000  
71.8110 137.0000  
71.8310 136.0000  
71.8500 134.0000  
71.8700 133.0000  
71.8890 133.0000  
71.9090 133.0000  
71.9280 134.0000  
71.9470 135.0000  
71.9670 136.0000  
71.9860 136.0000  
72.0060 136.0000  
72.0250 135.0000  
72.0450 134.0000  
72.0640 133.0000  
72.0840 133.0000  
72.1030 133.0000  
72.1220 133.0000  
72.1420 133.0000  
72.1610 132.0000  
72.1810 130.0000  
72.2000 128.0000  
72.2200 125.0000  
72.2390 123.0000  
72.2590 122.0000  
72.2780 122.0000  
72.2970 124.0000  
72.3170 127.0000  
72.3360 131.0000  
72.3560 136.0000  
72.3750 140.0000  
72.3950 142.0000  
72.4140 144.0000  
72.4340 143.0000  
72.4530 142.0000  
72.4720 139.0000  
72.4920 137.0000  
72.5110 136.0000  
72.5310 135.0000

72.5500 135.0000  
72.5700 136.0000  
72.5890 136.0000  
72.6090 136.0000  
72.6280 136.0000  
72.6470 136.0000  
72.6670 136.0000  
72.6860 136.0000  
72.7060 136.0000  
72.7250 136.0000  
72.7450 136.0000  
72.7640 136.0000  
72.7840 136.0000  
72.8030 136.0000  
72.8220 136.0000  
72.8420 136.0000  
72.8610 136.0000  
72.8810 136.0000  
72.9000 135.0000  
72.9200 134.0000  
72.9390 133.0000  
72.9590 131.0000  
72.9780 131.0000  
72.9970 130.0000  
73.0170 131.0000  
73.0360 133.0000  
73.0560 134.0000  
73.0750 136.0000  
73.0950 137.0000  
73.1140 138.0000  
73.1340 138.0000  
73.1530 138.0000  
73.1720 138.0000  
73.1920 138.0000  
73.2110 138.0000  
73.2310 138.0000  
73.2500 138.0000  
73.2700 139.0000  
73.2890 140.0000  
73.3090 141.0000  
73.3280 142.0000  
73.3470 144.0000  
73.3670 145.0000  
73.3860 146.0000

73.4060 147.0000  
73.4250 147.0000  
73.4450 147.0000  
73.4640 147.0000  
73.4840 147.0000  
73.5030 146.0000  
73.5220 144.0000  
73.5420 142.0000  
73.5610 139.0000  
73.5810 135.0000  
73.6000 131.0000  
73.6200 129.0000  
73.6390 128.0000  
73.6590 128.0000  
73.6780 130.0000  
73.6970 133.0000  
73.7170 136.0000  
73.7360 138.0000  
73.7560 140.0000  
73.7750 141.0000  
73.7950 141.0000  
73.8140 141.0000  
73.8340 141.0000  
73.8530 141.0000  
73.8720 141.0000  
73.8920 142.0000  
73.9110 142.0000  
73.9310 141.0000  
73.9500 139.0000  
73.9700 136.0000  
73.9890 133.0000  
74.0090 131.0000  
74.0280 130.0000  
74.0470 131.0000  
74.0670 132.0000  
74.0860 134.0000  
74.1060 137.0000  
74.1250 139.0000  
74.1450 140.0000  
74.1640 141.0000  
74.1840 140.0000  
74.2030 138.0000  
74.2220 135.0000  
74.2420 133.0000

74.2610 132.0000  
74.2810 131.0000  
74.3000 131.0000  
74.3200 132.0000  
74.3390 132.0000  
74.3590 132.0000  
74.3780 131.0000  
74.3970 130.0000  
74.4170 130.0000  
74.4360 131.0000  
74.4560 133.0000  
74.4750 136.0000  
74.4950 139.0000  
74.5140 143.0000  
74.5340 144.0000  
74.5530 145.0000  
74.5720 144.0000  
74.5920 144.0000  
74.6110 142.0000  
74.6310 141.0000  
74.6500 141.0000  
74.6700 140.0000  
74.6890 139.0000  
74.7090 138.0000  
74.7280 137.0000  
74.7470 137.0000  
74.7670 136.0000  
74.7860 135.0000  
74.8060 135.0000  
74.8250 134.0000  
74.8450 133.0000  
74.8640 133.0000  
74.8840 133.0000  
74.9030 133.0000  
74.9220 134.0000  
74.9420 134.0000  
74.9610 134.0000  
74.9810 133.0000  
75.0000 132.0000  
75.0200 130.0000  
75.0390 129.0000  
75.0590 129.0000  
75.0780 129.0000  
75.0970 130.0000

75.1170 132.0000  
75.1360 134.0000  
75.1560 137.0000  
75.1750 139.0000  
75.1950 141.0000  
75.2140 143.0000  
75.2340 144.0000  
75.2530 145.0000  
75.2720 144.0000  
75.2920 142.0000  
75.3110 139.0000  
75.3310 135.0000  
75.3500 132.0000  
75.3700 131.0000  
75.3890 130.0000  
75.4090 130.0000  
75.4280 132.0000  
75.4470 133.0000  
75.4670 134.0000  
75.4860 136.0000  
75.5060 136.0000  
75.5250 137.0000  
75.5450 137.0000  
75.5640 137.0000  
75.5840 138.0000  
75.6030 138.0000  
75.6220 138.0000  
75.6420 138.0000  
75.6610 138.0000  
75.6810 137.0000  
75.7000 136.0000  
75.7200 135.0000  
75.7390 134.0000  
75.7590 133.0000  
75.7780 133.0000  
75.7970 133.0000  
75.8170 134.0000  
75.8360 136.0000  
75.8560 138.0000  
75.8750 139.0000  
75.8950 139.0000  
75.9140 138.0000  
75.9340 136.0000  
75.9530 134.0000

75.9720 132.0000  
75.9920 131.0000  
76.0110 131.0000  
76.0310 131.0000  
76.0500 132.0000  
76.0700 133.0000  
76.0890 134.0000  
76.1090 135.0000  
76.1280 136.0000  
76.1470 138.0000  
76.1670 139.0000  
76.1860 140.0000  
76.2060 140.0000  
76.2250 138.0000  
76.2450 136.0000  
76.2640 134.0000  
76.2840 132.0000  
76.3030 132.0000  
76.3220 133.0000  
76.3420 135.0000  
76.3610 138.0000  
76.3810 140.0000  
76.4000 142.0000  
76.4200 142.0000  
76.4390 140.0000  
76.4590 138.0000  
76.4780 136.0000  
76.4970 135.0000  
76.5170 134.0000  
76.5360 134.0000  
76.5560 134.0000  
76.5750 134.0000  
76.5950 134.0000  
76.6140 133.0000  
76.6340 132.0000  
76.6530 131.0000  
76.6720 130.0000  
76.6920 129.0000  
76.7110 127.0000  
76.7310 126.0000  
76.7500 125.0000  
76.7700 125.0000  
76.7890 127.0000  
76.8090 130.0000

76.8280 132.0000  
76.8470 135.0000  
76.8670 137.0000  
76.8860 137.0000  
76.9060 135.0000  
76.9250 133.0000  
76.9450 129.0000  
76.9640 126.0000  
76.9840 123.0000  
77.0030 121.0000  
77.0220 120.0000  
77.0420 120.0000  
77.0610 122.0000  
77.0810 124.0000  
77.1000 127.0000  
77.1200 129.0000  
77.1390 132.0000  
77.1590 133.0000  
77.1780 134.0000  
77.1970 135.0000  
77.2170 135.0000  
77.2360 136.0000  
77.2560 137.0000  
77.2750 138.0000  
77.2950 139.0000  
77.3140 139.0000  
77.3340 138.0000  
77.3530 137.0000  
77.3720 136.0000  
77.3920 134.0000  
77.4110 133.0000  
77.4310 131.0000  
77.4500 129.0000  
77.4700 128.0000  
77.4890 127.0000  
77.5090 127.0000  
77.5280 128.0000  
77.5470 129.0000  
77.5670 130.0000  
77.5860 130.0000  
77.6060 129.0000  
77.6250 128.0000  
77.6450 126.0000  
77.6640 125.0000



77.6840 124.0000  
77.7030 124.0000  
77.7220 125.0000  
77.7420 125.0000  
77.7610 125.0000  
77.7810 125.0000  
77.8000 125.0000  
77.8200 126.0000  
77.8390 126.0000  
77.8590 127.0000  
77.8780 129.0000  
77.8970 130.0000  
77.9170 132.0000  
77.9360 134.0000  
77.9560 136.0000  
77.9750 137.0000  
77.9950 137.0000  
78.0140 136.0000  
78.0340 134.0000  
78.0530 132.0000  
78.0720 129.0000  
78.0920 127.0000  
78.1110 126.0000  
78.1310 126.0000  
78.1500 127.0000  
78.1700 129.0000  
78.1890 131.0000  
78.2090 131.0000  
78.2280 132.0000  
78.2470 131.0000  
78.2670 130.0000  
78.2860 129.0000  
78.3060 127.0000  
78.3250 127.0000  
78.3450 126.0000  
78.3640 126.0000  
78.3840 126.0000  
78.4030 125.0000  
78.4220 125.0000  
78.4420 126.0000  
78.4610 126.0000  
78.4810 128.0000  
78.5000 130.0000  
78.5200 132.0000

78.5390 134.0000  
78.5590 135.0000  
78.5780 135.0000  
78.5970 134.0000  
78.6170 132.0000  
78.6360 130.0000  
78.6560 127.0000  
78.6750 126.0000  
78.6950 125.0000  
78.7140 124.0000  
78.7340 124.0000  
78.7530 124.0000  
78.7720 124.0000  
78.7920 124.0000  
78.8110 124.0000  
78.8310 124.0000  
78.8500 125.0000  
78.8700 127.0000  
78.8890 129.0000  
78.9090 131.0000  
78.9280 132.0000  
78.9470 132.0000  
78.9670 132.0000  
78.9860 130.0000  
79.0060 128.0000  
79.0250 127.0000  
79.0450 126.0000  
79.0640 126.0000  
79.0840 127.0000  
79.1030 128.0000  
79.1220 128.0000  
79.1420 128.0000  
79.1610 127.0000  
79.1810 126.0000  
79.2000 125.0000  
79.2200 124.0000  
79.2390 124.0000  
79.2590 124.0000  
79.2780 124.0000  
79.2970 124.0000  
79.3170 124.0000  
79.3360 125.0000  
79.3560 125.0000  
79.3750 126.0000

79.3950 126.0000  
79.4140 126.0000  
79.4340 125.0000  
79.4530 124.0000  
79.4720 123.0000  
79.4920 121.0000  
79.5110 120.0000  
79.5310 120.0000  
79.5500 120.0000  
79.5700 121.0000  
79.5890 123.0000  
79.6090 126.0000  
79.6280 128.0000  
79.6470 130.0000  
79.6670 130.0000  
79.6860 130.0000  
79.7060 129.0000  
79.7250 128.0000  
79.7450 127.0000  
79.7640 127.0000  
79.7840 128.0000  
79.8030 130.0000  
79.8220 132.0000  
79.8420 134.0000  
79.8610 135.0000  
79.8810 135.0000  
79.9000 133.0000  
79.9200 132.0000  
79.9390 130.0000  
79.9590 128.0000  
79.9780 128.0000  
79.9970 128.0000



|                                         |      |      |      |      |      |      |
|-----------------------------------------|------|------|------|------|------|------|
| <i>Turicibacter</i>                     | 0.00 | 0.00 | 0.00 | 0.00 | 0.00 | 0.00 |
| <i>Ralstonia</i>                        | 0.00 | 0.00 | 0.00 | 0.00 | 0.00 | 0.00 |
| <i>Christensenellaceae_R-7_group</i>    | 0.00 | 0.00 | 0.00 | 0.00 | 0.00 | 0.00 |
| <i>Prevotellaceae_Ga6A1_group</i>       | 0.00 | 0.00 | 0.00 | 0.00 | 0.00 | 0.00 |
| <i>Lachnoclostridium</i>                | 0.00 | 0.00 | 0.00 | 0.00 | 0.00 | 0.00 |
| <i>Odoribacter</i>                      | 0.00 | 0.00 | 0.00 | 0.00 | 0.00 | 0.00 |
| <i>Coriobacteriaceae_UCG-002</i>        | 0.00 | 0.00 | 0.00 | 0.00 | 0.00 | 0.00 |
| <i>Herbaspirillum</i>                   | 0.00 | 0.00 | 0.00 | 0.00 | 0.00 | 0.00 |
| <i>[Eubacterium]_eligens_group</i>      | 0.00 | 0.00 | 0.00 | 0.00 | 0.00 | 0.00 |
| <i>Erysipelatoclostridium</i>           | 0.00 | 0.00 | 0.00 | 0.00 | 0.00 | 0.00 |
| <i>[Eubacterium]_ruminantium_group</i>  | 0.00 | 0.00 | 0.00 | 0.00 | 0.00 | 0.00 |
| <i>Dialister</i>                        | 0.00 | 0.00 | 0.00 | 0.00 | 0.00 | 0.00 |
| <i>Mucispirillum</i>                    | 0.00 | 0.00 | 0.00 | 0.00 | 0.00 | 0.00 |
| <i>Lachnospiraceae_UCG-006</i>          | 0.00 | 0.00 | 0.00 | 0.00 | 0.00 | 0.00 |
| <i>UCG-005</i>                          | 0.00 | 0.00 | 0.00 | 0.00 | 0.00 | 0.00 |
| <i>Parasutterella</i>                   | 0.00 | 0.00 | 0.00 | 0.00 | 0.00 | 0.00 |
| <i>Holdemanella</i>                     | 0.00 | 0.00 | 0.00 | 0.00 | 0.00 | 0.00 |
| <i>Family_XIII_AD3011_group</i>         | 0.00 | 0.00 | 0.00 | 0.00 | 0.00 | 0.00 |
| <i>Weissella</i>                        | 0.00 | 0.00 | 0.00 | 0.00 | 0.00 | 0.00 |
| <i>Arthrobacter</i>                     | 0.00 | 0.00 | 0.00 | 0.00 | 0.00 | 0.00 |
| <i>Pseudarthrobacter</i>                | 0.00 | 0.00 | 0.00 | 0.00 | 0.00 | 0.00 |
| <i>Oscillibacter</i>                    | 0.00 | 0.00 | 0.00 | 0.00 | 0.00 | 0.00 |
| <i>Desulfovibrio</i>                    | 0.00 | 0.00 | 0.00 | 0.00 | 0.00 | 0.00 |
| <i>[Eubacterium]_fissicatena_group</i>  | 0.00 | 0.00 | 0.00 | 0.00 | 0.00 | 0.00 |
| <i>[Ruminococcus]_torques_group</i>     | 0.00 | 0.00 | 0.00 | 0.00 | 0.00 | 0.00 |
| <i>Veillonella</i>                      | 0.00 | 0.00 | 0.00 | 0.00 | 0.00 | 0.00 |
| <i>[Eubacterium]_xylanophilum_group</i> | 0.00 | 0.00 | 0.00 | 0.00 | 0.00 | 0.00 |
| <i>unidentified_Rhodospirillales</i>    | 0.00 | 0.00 | 0.00 | 0.00 | 0.00 | 0.00 |
| <i>Coproccoccus</i>                     | 0.00 | 0.00 | 0.00 | 0.00 | 0.00 | 0.00 |
| <i>Romboutsia</i>                       | 0.00 | 0.00 | 0.00 | 0.00 | 0.00 | 0.00 |
| <i>Phascolarctobacterium</i>            | 0.00 | 0.00 | 0.00 | 0.00 | 0.00 | 0.00 |
| <i>Methanobrevibacter</i>               | 0.00 | 0.00 | 0.00 | 0.00 | 0.00 | 0.00 |
| <i>Catenibacterium</i>                  | 0.00 | 0.00 | 0.00 | 0.00 | 0.00 | 0.00 |
| <i>Lachnospiraceae_UCG-001</i>          | 0.00 | 0.00 | 0.00 | 0.00 | 0.00 | 0.00 |
| <i>ASF356</i>                           | 0.00 | 0.00 | 0.00 | 0.00 | 0.00 | 0.00 |
| <i>Anaerostipes</i>                     | 0.00 | 0.00 | 0.00 | 0.00 | 0.00 | 0.00 |
| <i>Agathobacter</i>                     | 0.00 | 0.00 | 0.00 | 0.00 | 0.00 | 0.00 |
| <i>[Eubacterium]_ventriosum_group</i>   | 0.00 | 0.00 | 0.00 | 0.00 | 0.00 | 0.00 |
| <i>Ileibacterium</i>                    | 0.00 | 0.00 | 0.00 | 0.00 | 0.00 | 0.00 |
| <i>Intestinimonas</i>                   | 0.00 | 0.00 | 0.00 | 0.00 | 0.00 | 0.00 |
| <i>Collinsella</i>                      | 0.00 | 0.00 | 0.00 | 0.00 | 0.00 | 0.00 |
| <i>Microbacterium</i>                   | 0.00 | 0.00 | 0.00 | 0.00 | 0.00 | 0.00 |
| <i>Klebsiella</i>                       | 0.00 | 0.00 | 0.00 | 0.00 | 0.00 | 0.00 |
| <i>Delftia</i>                          | 0.00 | 0.00 | 0.00 | 0.00 | 0.00 | 0.00 |

|                                     |      |      |      |      |      |      |
|-------------------------------------|------|------|------|------|------|------|
| <i>Proteus</i>                      | 0.00 | 0.00 | 0.00 | 0.00 | 0.00 | 0.00 |
| <i>Allisonella</i>                  | 0.00 | 0.00 | 0.00 | 0.00 | 0.00 | 0.00 |
| <i>GCA-900066575</i>                | 0.00 | 0.00 | 0.00 | 0.00 | 0.00 | 0.00 |
| <i>Pyramidobacter</i>               | 0.00 | 0.00 | 0.00 | 0.00 | 0.00 | 0.00 |
| <i>Anaerotruncus</i>                | 0.00 | 0.00 | 0.00 | 0.00 | 0.00 | 0.00 |
| <i>Bacillus</i>                     | 0.00 | 0.00 | 0.00 | 0.00 | 0.00 | 0.00 |
| <i>Staphylococcus</i>               | 0.00 | 0.00 | 0.00 | 0.00 | 0.00 | 0.00 |
| <i>Fusobacterium</i>                | 0.00 | 0.00 | 0.00 | 0.00 | 0.00 | 0.00 |
| <i>Vagococcus</i>                   | 0.00 | 0.00 | 0.00 | 0.00 | 0.00 | 0.00 |
| <i>Dorea</i>                        | 0.00 | 0.00 | 0.00 | 0.00 | 0.00 | 0.00 |
| <i>Lachnospira</i>                  | 0.00 | 0.00 | 0.00 | 0.00 | 0.00 | 0.00 |
| <i>Adlercreutzia</i>                | 0.00 | 0.00 | 0.00 | 0.00 | 0.00 | 0.00 |
| <i>Paraprevotella</i>               | 0.00 | 0.00 | 0.00 | 0.00 | 0.00 | 0.00 |
| <i>Burkholderia-Caballeronia-</i>   |      |      |      |      |      |      |
| <i>Paraburkholderia</i>             | 0.00 | 0.00 | 0.00 | 0.00 | 0.00 | 0.00 |
| <i>Anaeroplasma</i>                 | 0.00 | 0.00 | 0.00 | 0.00 | 0.00 | 0.00 |
| <i>Butyricicoccus</i>               | 0.00 | 0.00 | 0.00 | 0.00 | 0.00 | 0.00 |
| <i>Sutterella</i>                   | 0.00 | 0.00 | 0.00 | 0.00 | 0.00 | 0.00 |
| <i>Peptococcus</i>                  | 0.00 | 0.00 | 0.00 | 0.00 | 0.00 | 0.00 |
| <i>Moraxella</i>                    | 0.00 | 0.00 | 0.00 | 0.00 | 0.00 | 0.00 |
| <i>Carnobacterium</i>               | 0.00 | 0.00 | 0.00 | 0.00 | 0.00 | 0.00 |
| <i>[Eubacterium]_brachy_group</i>   | 0.00 | 0.00 | 0.00 | 0.00 | 0.00 | 0.00 |
| <i>Monoglobus</i>                   | 0.00 | 0.00 | 0.00 | 0.00 | 0.00 | 0.00 |
| <i>CAG-352</i>                      | 0.00 | 0.00 | 0.00 | 0.00 | 0.00 | 0.00 |
| <i>Enhydrobacter</i>                | 0.00 | 0.00 | 0.00 | 0.00 | 0.00 | 0.00 |
| <i>unidentified_Ruminococcaceae</i> | 0.00 | 0.00 | 0.00 | 0.00 | 0.00 | 0.00 |
| <i>unidentified_Lachnospiraceae</i> | 0.00 | 0.00 | 0.00 | 0.00 | 0.00 | 0.00 |
| <i>Myroides</i>                     | 0.00 | 0.00 | 0.00 | 0.00 | 0.00 | 0.00 |
| <i>Bilophila</i>                    | 0.00 | 0.00 | 0.00 | 0.00 | 0.00 | 0.00 |
| <i>Peptostreptococcus</i>           | 0.00 | 0.00 | 0.00 | 0.00 | 0.00 | 0.00 |
| <i>Haemophilus</i>                  | 0.00 | 0.00 | 0.00 | 0.00 | 0.00 | 0.00 |
| <i>[Eubacterium]_nodatum_group</i>  | 0.00 | 0.00 | 0.00 | 0.00 | 0.00 | 0.00 |
| <i>Caldicoprobacter</i>             | 0.00 | 0.00 | 0.00 | 0.00 | 0.00 | 0.00 |
| <i>UCG-003</i>                      | 0.00 | 0.00 | 0.00 | 0.00 | 0.00 | 0.00 |
| <i>UBA1819</i>                      | 0.00 | 0.00 | 0.00 | 0.00 | 0.00 | 0.00 |
| <i>Intestinibacter</i>              | 0.00 | 0.00 | 0.00 | 0.00 | 0.00 | 0.00 |
| <i>Lachnospiraceae_ND3007_group</i> | 0.00 | 0.00 | 0.00 | 0.00 | 0.00 | 0.00 |
| <i>Megamonas</i>                    | 0.00 | 0.00 | 0.00 | 0.00 | 0.00 | 0.00 |
| <i>Lachnospiraceae_UCG-010</i>      | 0.00 | 0.00 | 0.00 | 0.00 | 0.00 | 0.00 |
| <i>Negativibacillus</i>             | 0.00 | 0.00 | 0.00 | 0.00 | 0.00 | 0.00 |
| <i>Mucilaginibacter</i>             | 0.00 | 0.00 | 0.00 | 0.00 | 0.00 | 0.00 |
| <i>[Eubacterium]_hallii_group</i>   | 0.00 | 0.00 | 0.00 | 0.00 | 0.00 | 0.00 |
| <i>Tuzzerella</i>                   | 0.00 | 0.00 | 0.00 | 0.00 | 0.00 | 0.00 |
| <i>Lachnospiraceae_UCG-004</i>      | 0.00 | 0.00 | 0.00 | 0.00 | 0.00 | 0.00 |

|                                             |      |      |      |      |      |      |
|---------------------------------------------|------|------|------|------|------|------|
| <i>Eggerthella</i>                          | 0.00 | 0.00 | 0.00 | 0.00 | 0.00 | 0.00 |
| <i>Rikenella</i>                            | 0.00 | 0.00 | 0.00 | 0.00 | 0.00 | 0.00 |
| <i>Holdemania</i>                           | 0.00 | 0.00 | 0.00 | 0.00 | 0.00 | 0.00 |
| <i>Anaerovorax</i>                          | 0.00 | 0.00 | 0.00 | 0.00 | 0.00 | 0.00 |
| <i>Prevotella_7</i>                         | 0.00 | 0.00 | 0.00 | 0.00 | 0.00 | 0.00 |
| <i>CAG-56</i>                               | 0.00 | 0.00 | 0.00 | 0.00 | 0.00 | 0.00 |
| <i>Erysipelotrichaceae_UCG-003</i>          | 0.00 | 0.00 | 0.00 | 0.00 | 0.00 | 0.00 |
| <i>Fusicatenibacter</i>                     | 0.00 | 0.00 | 0.00 | 0.00 | 0.00 | 0.00 |
| <i>Marvinbryantia</i>                       | 0.00 | 0.00 | 0.00 | 0.00 | 0.00 | 0.00 |
| <i>unidentified_Christensenellaceae</i>     | 0.00 | 0.00 | 0.00 | 0.00 | 0.00 | 0.00 |
| <i>UCG-009</i>                              | 0.00 | 0.00 | 0.00 | 0.00 | 0.00 | 0.00 |
| <i>unidentified_Mitochondria</i>            | 0.00 | 0.00 | 0.00 | 0.00 | 0.00 | 0.00 |
| <i>Lacticaseibacillus</i>                   | 0.00 | 0.00 | 0.00 | 0.00 | 0.00 | 0.00 |
| <i>Undibacterium</i>                        | 0.00 | 0.00 | 0.00 | 0.00 | 0.00 | 0.00 |
| <i>Leifsonia</i>                            | 0.00 | 0.00 | 0.00 | 0.00 | 0.00 | 0.00 |
| <i>Senegalimassilia</i>                     | 0.00 | 0.00 | 0.00 | 0.00 | 0.00 | 0.00 |
| <i>Rothia</i>                               | 0.00 | 0.00 | 0.00 | 0.00 | 0.00 | 0.00 |
| <i>Serratia</i>                             | 0.00 | 0.00 | 0.00 | 0.00 | 0.00 | 0.00 |
| <i>c__Clostridia;g__unidentified_Rumino</i> | 0.00 | 0.00 | 0.00 | 0.00 | 0.00 | 0.00 |
| <i>coccaceae</i>                            |      |      |      |      |      |      |
| <i>Family_XIII_UCG-001</i>                  | 0.00 | 0.00 | 0.00 | 0.00 | 0.00 | 0.00 |
| <i>Leuconostoc</i>                          | 0.00 | 0.00 | 0.00 | 0.00 | 0.00 | 0.00 |
| <i>Defluviitaleaceae_UCG-011</i>            | 0.00 | 0.00 | 0.00 | 0.00 | 0.00 | 0.00 |
| <i>Paludicola</i>                           | 0.00 | 0.00 | 0.00 | 0.00 | 0.00 | 0.00 |
| <i>Acetitomaculum</i>                       | 0.00 | 0.00 | 0.00 | 0.00 | 0.00 | 0.00 |
| <i>Eubacterium</i>                          | 0.00 | 0.00 | 0.00 | 0.00 | 0.00 | 0.00 |
| <i>Exiguobacterium</i>                      | 0.00 | 0.00 | 0.00 | 0.00 | 0.00 | 0.00 |
| <i>Aggregatibacter</i>                      | 0.00 | 0.00 | 0.00 | 0.00 | 0.00 | 0.00 |
| <i>SWB02</i>                                | 0.00 | 0.00 | 0.00 | 0.00 | 0.00 | 0.00 |
| <i>Thiopseudomonas</i>                      | 0.00 | 0.00 | 0.00 | 0.00 | 0.00 | 0.00 |
| <i>Mangrovibacter</i>                       | 0.00 | 0.00 | 0.00 | 0.00 | 0.00 | 0.00 |
| <i>Harryflintia</i>                         | 0.00 | 0.00 | 0.00 | 0.00 | 0.00 | 0.00 |
| <i>unidentified_Chloroplast</i>             | 0.00 | 0.00 | 0.00 | 0.00 | 0.00 | 0.00 |
| <i>Methylobacterium-Methylorubrum</i>       | 0.00 | 0.00 | 0.00 | 0.00 | 0.00 | 0.00 |
| <i>Flavonifractor</i>                       | 0.00 | 0.00 | 0.00 | 0.00 | 0.00 | 0.00 |
| <i>Anaerofustis</i>                         | 0.00 | 0.00 | 0.00 | 0.00 | 0.00 | 0.00 |
| <i>Liquorilactobacillus</i>                 | 0.00 | 0.00 | 0.00 | 0.00 | 0.00 | 0.00 |
| <i>Mycoplasma</i>                           | 0.00 | 0.00 | 0.00 | 0.00 | 0.00 | 0.00 |
| <i>Achromobacter</i>                        | 0.00 | 0.00 | 0.00 | 0.00 | 0.00 | 0.00 |
| <i>Megasphaera</i>                          | 0.00 | 0.00 | 0.00 | 0.00 | 0.00 | 0.00 |
| <i>Duganella</i>                            | 0.00 | 0.00 | 0.00 | 0.00 | 0.00 | 0.00 |
| <i>Macrococcus</i>                          | 0.00 | 0.00 | 0.00 | 0.00 | 0.00 | 0.00 |
| <i>Fermentimonas</i>                        | 0.00 | 0.00 | 0.00 | 0.00 | 0.00 | 0.00 |
| <i>Clostridium_sensu_stricto_11</i>         | 0.00 | 0.00 | 0.00 | 0.00 | 0.00 | 0.00 |

|                                                           |      |      |      |      |      |      |
|-----------------------------------------------------------|------|------|------|------|------|------|
| <i>Ruminoflibacter</i>                                    | 0.00 | 0.00 | 0.00 | 0.00 | 0.00 | 0.00 |
| <i>Coprobacter</i>                                        | 0.00 | 0.00 | 0.00 | 0.00 | 0.00 | 0.00 |
| <i>Ruminiclostridium</i>                                  | 0.00 | 0.00 | 0.00 | 0.00 | 0.00 | 0.00 |
| <i>Aeromonas</i>                                          | 0.00 | 0.00 | 0.00 | 0.00 | 0.00 | 0.00 |
| <i>Amphibacillus</i>                                      | 0.00 | 0.00 | 0.00 | 0.00 | 0.00 | 0.00 |
| <i>Tyzzereella</i>                                        | 0.00 | 0.00 | 0.00 | 0.00 | 0.00 | 0.00 |
| <i>Candidatus_Soleaferrea</i>                             | 0.00 | 0.00 | 0.00 | 0.00 | 0.00 | 0.00 |
| <i>Solobacterium</i>                                      | 0.00 | 0.00 | 0.00 | 0.00 | 0.00 | 0.00 |
| <i>Comamonas</i>                                          | 0.00 | 0.00 | 0.00 | 0.00 | 0.00 | 0.00 |
| <i>Frisingicoccus</i>                                     | 0.00 | 0.00 | 0.00 | 0.00 | 0.00 | 0.00 |
| <i>Endobacter</i>                                         | 0.00 | 0.00 | 0.00 | 0.00 | 0.00 | 0.00 |
| <i>Neisseria</i>                                          | 0.00 | 0.00 | 0.00 | 0.00 | 0.00 | 0.00 |
| <i>[Clostridium]_innocuum_group</i>                       | 0.00 | 0.00 | 0.00 | 0.00 | 0.00 | 0.00 |
| <i>Selenomonas</i>                                        | 0.00 | 0.00 | 0.00 | 0.00 | 0.00 | 0.00 |
| <i>Phenylobacterium</i>                                   | 0.00 | 0.00 | 0.00 | 0.00 | 0.00 | 0.00 |
| <i>Lachnospiraceae_FCS020_group</i>                       | 0.00 | 0.00 | 0.00 | 0.00 | 0.00 | 0.00 |
| <i>Stenotrophomonas</i>                                   | 0.00 | 0.00 | 0.00 | 0.00 | 0.00 | 0.00 |
| <i>Marinimicrobium</i>                                    | 0.00 | 0.00 | 0.00 | 0.00 | 0.00 | 0.00 |
| <i>A2</i>                                                 | 0.00 | 0.00 | 0.00 | 0.00 | 0.00 | 0.00 |
| <i>Aquabacterium</i>                                      | 0.00 | 0.00 | 0.00 | 0.00 | 0.00 | 0.00 |
| <i>Halocella</i>                                          | 0.00 | 0.00 | 0.00 | 0.00 | 0.00 | 0.00 |
| <i>Clostridium_sensu_stricto_12</i>                       | 0.00 | 0.00 | 0.00 | 0.00 | 0.00 | 0.00 |
| <i>Haloplasma</i>                                         | 0.00 | 0.00 | 0.00 | 0.00 | 0.00 | 0.00 |
| <i>Candidatus_Stoquefichus</i>                            | 0.00 | 0.00 | 0.00 | 0.00 | 0.00 | 0.00 |
| <i>Sporosarcina</i>                                       | 0.00 | 0.00 | 0.00 | 0.00 | 0.00 | 0.00 |
| <i>Anaplasma</i>                                          | 0.00 | 0.00 | 0.00 | 0.00 | 0.00 | 0.00 |
| <i>Skermanella</i>                                        | 0.00 | 0.00 | 0.00 | 0.00 | 0.00 | 0.00 |
| <i>Schleiferilactobacillus</i>                            | 0.00 | 0.00 | 0.00 | 0.00 | 0.00 | 0.00 |
| <i>Paenibacillus</i>                                      | 0.00 | 0.00 | 0.00 | 0.00 | 0.00 | 0.00 |
| <i>unidentified_Prevotellaceae</i>                        | 0.00 | 0.00 | 0.00 | 0.00 | 0.00 | 0.00 |
| <i>Oribacterium</i>                                       | 0.00 | 0.00 | 0.00 | 0.00 | 0.00 | 0.00 |
| <i>Actinomyces</i>                                        | 0.00 | 0.00 | 0.00 | 0.00 | 0.00 | 0.00 |
| <i>Taibaiella</i>                                         | 0.00 | 0.00 | 0.00 | 0.00 | 0.00 | 0.00 |
| <i>Parvibacter</i>                                        | 0.00 | 0.00 | 0.00 | 0.00 | 0.00 | 0.00 |
| <i>Ercella</i>                                            | 0.00 | 0.00 | 0.00 | 0.00 | 0.00 | 0.00 |
| <i>Shewanella</i>                                         | 0.00 | 0.00 | 0.00 | 0.00 | 0.00 | 0.00 |
| <i>Gordonibacter</i>                                      | 0.00 | 0.00 | 0.00 | 0.00 | 0.00 | 0.00 |
| <i>Rickettsia</i>                                         | 0.00 | 0.00 | 0.00 | 0.00 | 0.00 | 0.00 |
| <i>Pectinatus</i>                                         | 0.00 | 0.00 | 0.00 | 0.00 | 0.00 | 0.00 |
| <i>Spirosoma</i>                                          | 0.00 | 0.00 | 0.00 | 0.00 | 0.00 | 0.00 |
| <i>Candidatus_Arthromitus</i>                             | 0.00 | 0.00 | 0.00 | 0.00 | 0.00 | 0.00 |
| <i>Phoceia</i>                                            | 0.00 | 0.00 | 0.00 | 0.00 | 0.00 | 0.00 |
| <i>Allorhizobium-Neorhizobium-Pararhizobium-Rhizobium</i> | 0.00 | 0.00 | 0.00 | 0.00 | 0.00 | 0.00 |



|                                         |      |      |      |      |      |      |
|-----------------------------------------|------|------|------|------|------|------|
| <i>Corynebacterium</i>                  | 0.00 | 0.00 | 0.00 | 0.00 | 0.00 | 0.00 |
| <i>Dietzia</i>                          | 0.00 | 0.00 | 0.00 | 0.00 | 0.00 | 0.00 |
| <i>unidentified_Gastranaerophilales</i> | 0.00 | 0.00 | 0.00 | 0.00 | 0.00 | 0.00 |
| <i>Luteibacter</i>                      | 0.00 | 0.00 | 0.00 | 0.00 | 0.00 | 0.00 |
| <i>Hymenobacter</i>                     | 0.00 | 0.00 | 0.00 | 0.00 | 0.00 | 0.00 |
| <i>Pseudogracilibacillus</i>            | 0.00 | 0.00 | 0.00 | 0.00 | 0.00 | 0.00 |
| <i>Fibroacter</i>                       | 0.00 | 0.00 | 0.00 | 0.00 | 0.00 | 0.00 |
| <i>Kurthia</i>                          | 0.00 | 0.00 | 0.00 | 0.00 | 0.00 | 0.00 |
| <i>Halomonas</i>                        | 0.00 | 0.00 | 0.00 | 0.00 | 0.00 | 0.00 |
| <i>Gemella</i>                          | 0.00 | 0.00 | 0.00 | 0.00 | 0.00 | 0.00 |
| <i>Gaiella</i>                          | 0.00 | 0.00 | 0.00 | 0.00 | 0.00 | 0.00 |
| <i>Aminobacter</i>                      | 0.00 | 0.00 | 0.00 | 0.00 | 0.00 | 0.00 |
| <i>Tepidimicrobium</i>                  | 0.00 | 0.00 | 0.00 | 0.00 | 0.00 | 0.00 |
| <i>Olsenella</i>                        | 0.00 | 0.00 | 0.00 | 0.00 | 0.00 | 0.00 |
| <i>Epulopiscium</i>                     | 0.00 | 0.00 | 0.00 | 0.00 | 0.00 | 0.00 |
| <i>Papillibacter</i>                    | 0.00 | 0.00 | 0.00 | 0.00 | 0.00 | 0.00 |
| <i>Acetatifactor</i>                    | 0.00 | 0.00 | 0.00 | 0.00 | 0.00 | 0.00 |
| <i>Arsenicococcus</i>                   | 0.00 | 0.00 | 0.00 | 0.00 | 0.00 | 0.00 |
| <i>Aliidiomarina</i>                    | 0.00 | 0.00 | 0.00 | 0.00 | 0.00 | 0.00 |
| <i>Brevundimonas</i>                    | 0.00 | 0.00 | 0.00 | 0.00 | 0.00 | 0.00 |
| <i>Fibrella</i>                         | 0.00 | 0.00 | 0.00 | 0.00 | 0.00 | 0.00 |
| <i>Novibacillus</i>                     | 0.00 | 0.00 | 0.00 | 0.00 | 0.00 | 0.00 |
| <i>Lactiplantibacillus</i>              | 0.00 | 0.00 | 0.00 | 0.00 | 0.00 | 0.00 |
| <i>Bryobacter</i>                       | 0.00 | 0.00 | 0.00 | 0.00 | 0.00 | 0.00 |
| <i>Acidicaldus</i>                      | 0.00 | 0.00 | 0.00 | 0.00 | 0.00 | 0.00 |
| <i>Acholeplasma</i>                     | 0.00 | 0.00 | 0.00 | 0.00 | 0.00 | 0.00 |
| <i>Ideonella</i>                        | 0.00 | 0.00 | 0.00 | 0.00 | 0.00 | 0.00 |
| <i>Roseimarinus</i>                     | 0.00 | 0.00 | 0.00 | 0.00 | 0.00 | 0.00 |
| <i>Kribbella</i>                        | 0.00 | 0.00 | 0.00 | 0.00 | 0.00 | 0.00 |
| <i>TM7x</i>                             | 0.00 | 0.00 | 0.00 | 0.00 | 0.00 | 0.00 |
| <i>Cloacibacterium</i>                  | 0.00 | 0.00 | 0.00 | 0.00 | 0.00 | 0.00 |
| <i>Candidatus_Solibacter</i>            | 0.00 | 0.00 | 0.00 | 0.00 | 0.00 | 0.00 |
| <i>Nubsella</i>                         | 0.00 | 0.00 | 0.00 | 0.00 | 0.00 | 0.00 |
| <i>Cutibacterium</i>                    | 0.00 | 0.00 | 0.00 | 0.00 | 0.00 | 0.00 |
| <i>Ammoniibacillus</i>                  | 0.00 | 0.00 | 0.00 | 0.00 | 0.00 | 0.00 |
| <i>Gracilibacillus</i>                  | 0.00 | 0.00 | 0.00 | 0.00 | 0.00 | 0.00 |
| <i>Lysinibacillus</i>                   | 0.00 | 0.00 | 0.00 | 0.00 | 0.00 | 0.00 |
| <i>Anaerococcus</i>                     | 0.00 | 0.00 | 0.00 | 0.00 | 0.00 | 0.00 |
| <i>Arcobacter</i>                       | 0.00 | 0.00 | 0.00 | 0.00 | 0.00 | 0.00 |
| <i>Fournierella</i>                     | 0.00 | 0.00 | 0.00 | 0.00 | 0.00 | 0.00 |
| <i>Sinomonas</i>                        | 0.00 | 0.00 | 0.00 | 0.00 | 0.00 | 0.00 |
| <i>MND1</i>                             | 0.00 | 0.00 | 0.00 | 0.00 | 0.00 | 0.00 |
| <i>UCG-012</i>                          | 0.00 | 0.00 | 0.00 | 0.00 | 0.00 | 0.00 |
| <i>Flavobacterium</i>                   | 0.00 | 0.00 | 0.00 | 0.00 | 0.00 | 0.00 |

|                                 |      |      |      |      |      |      |
|---------------------------------|------|------|------|------|------|------|
| <i>Desulfohalotomaculum</i>     | 0.00 | 0.00 | 0.00 | 0.00 | 0.00 | 0.00 |
| <i>Hydrogenoanaerobacterium</i> | 0.00 | 0.00 | 0.00 | 0.00 | 0.00 | 0.00 |
| <i>RB41</i>                     | 0.00 | 0.00 | 0.00 | 0.00 | 0.00 | 0.00 |
| <i>Hydrogenispora</i>           | 0.00 | 0.00 | 0.00 | 0.00 | 0.00 | 0.00 |
| <i>Anaerostignum</i>            | 0.00 | 0.00 | 0.00 | 0.00 | 0.00 | 0.00 |
| <i>Brochothrix</i>              | 0.00 | 0.00 | 0.00 | 0.00 | 0.00 | 0.00 |
| <i>Acidibacter</i>              | 0.00 | 0.00 | 0.00 | 0.00 | 0.00 | 0.00 |
| <i>Planktomarina</i>            | 0.00 | 0.00 | 0.00 | 0.00 | 0.00 | 0.00 |
| <i>Prevotella</i>               | 0.00 | 0.00 | 0.00 | 0.00 | 0.00 | 0.00 |
| <i>Nocardiopsis</i>             | 0.00 | 0.00 | 0.00 | 0.00 | 0.00 | 0.00 |
| <i>Pygmaibacter</i>             | 0.00 | 0.00 | 0.00 | 0.00 | 0.00 | 0.00 |
| <i>Bradyrhizobium</i>           | 0.00 | 0.00 | 0.00 | 0.00 | 0.00 | 0.00 |
| <i>Sinibacillus</i>             | 0.00 | 0.00 | 0.00 | 0.00 | 0.00 | 0.00 |
| <i>Others</i>                   | 0.42 | 0.26 | 0.31 | 0.31 | 0.30 | 0.25 |
